# Supplementary material for: Fei-Phos ligand-controlled asymmetric palladium-catalyzed allylic substitutions with structurally diverse nucleophiles: scope and limitations
Source: Royal Society of Chemistry journal article supplement (doi:10.1039/c6ra09657c), 2016-01-01
Supplement: c6ra09657c1.pdf [file c6ra09657c1.pdf]

# Supporting Information

## Fei-Phos Ligand-controlled Asymmetric Palladium -Catalyzed Allylic Substitutions with Structurally Diverse Nucleophiles: Scope and Limitation

Jian-Xing Xu<sup>a</sup>, Fei Ye<sup>a</sup>, Xing-Feng Bai<sup>a,b</sup>, Jin Zhang<sup>a</sup>, Zheng Xu<sup>a</sup>,

Zhan-Jiang Zheng<sup>a</sup>, and Li-Wen Xu<sup>a,b\*</sup>

<sup>a</sup> Key Laboratory of Organosilicon Chemistry and Material Technology of Ministry of Education, Hangzhou Normal University, Hangzhou 311121, P. R. China  
Fax: (+) 86-571-28867756, E-mail: liwenxu@hznu.edu.cn

<sup>b</sup> State Key Laboratory for Oxo Synthesis and Selective Oxidation, Lanzhou Institute of Chemical Physics (CAS) and University of the Chinese Academy of Sciences, Lanzhou 730000, P. R. China

### Table of Contents

|                                                                                                                            |     |
|----------------------------------------------------------------------------------------------------------------------------|-----|
| 1. General Information.....                                                                                                | S2  |
| 2. Synthesis of chiral ligands.....                                                                                        | S3  |
| 3. General procedures for Pd-catalyzed asymmetric allylation alkylation to the formation of products 2, 3, 5,6, and 8..... | S7  |
| 4. Table S1-S9.....                                                                                                        | S27 |
| 5. NMR Spectra of products: <sup>1</sup> H, <sup>13</sup> C, <sup>31</sup> P NMR.....                                      | S35 |
| 6. HPLC Spectra of products: Determination of <i>ee</i> values.....                                                        | S78 |

## 1. General Information

All the reactions dealing with air or moisture sensitive compounds were carried out in a dry reaction vessel under positive pressure of argon. Reagents were purchased from commercial sources and were used as received unless mentioned otherwise. Reactions were monitored by thin layer chromatography using silica gel. Air- and moisture-sensitive liquids and solutions were transferred via a syringe or a stainless steel cannula.  $^1\text{H}$ NMR was recorded at 400 MHz or 500 MHz: chemical shifts are reported in ppm relative to tetramethylsilane (TMS) with the solvent resonance employed as the internal standard ( $\text{CDCl}_3$ :  $\delta = 7.26$  ppm).  $^{13}\text{C}$  NMR was recorded at 100 MHz or 125 MHz: chemical shifts are reported in ppm from tetramethylsilane (TMS) with the solvent resonance as the internal standard ( $\text{CDCl}_3$ :  $\delta = 77.20$  ppm). High resolution mass spectra (HRMS) of the products were obtained on a Bruker Daltonics micro TOF-spectrometer. Infrared spectra were recorded on a Nexus 870 FTIR spectrometer. Toluene, N,N-Dimethylacetamide (DMAc), and  $\text{CHCl}_3$  was dried and distilled over  $\text{CaH}_2$ . THF were distilled from sodium benzophenone ketyl. The preparation of allylic substrates, such as 1,3-diphenyl-2-propenyl acetate was carried out easily according to reported methods<sup>[1]</sup>.

## 2. Synthesis of chiral ligands<sup>[2]</sup>

The product of similar chiral ligands in the previous report.<sup>[2]</sup>

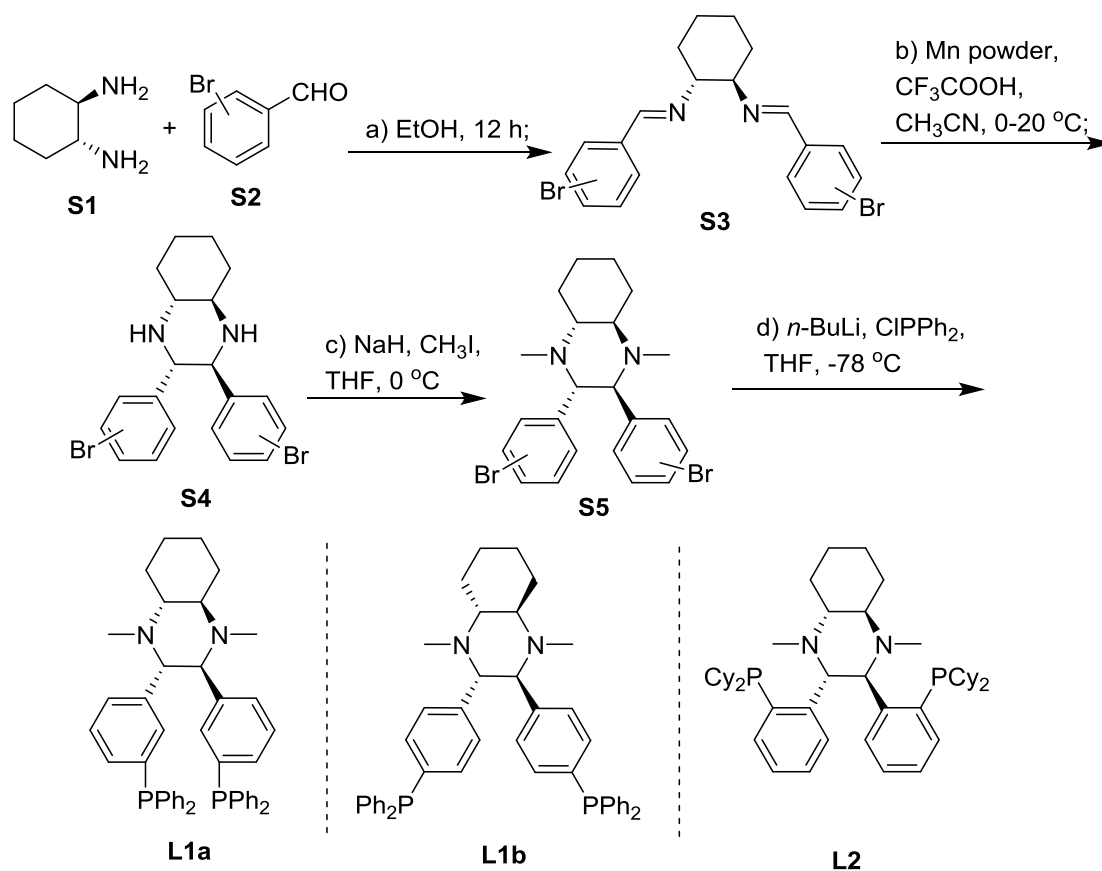

A solution of Bromobenzaldehyde **S2** (9.2 g, 50 mmol) in EtOH (25 mL) was added dropwise to the ethanol/H<sub>2</sub>O (1.5/1) solution (50 mL) of trans-(*R,R*)-diaminocyclohexane **S1** (2.85 g, 25 mmol) at room temperature over 1 h. After stirring at reflux temperature for 12 h, H<sub>2</sub>O (30 mL) was added to the mixture and cooled to 0 °C. After maintain it for 5 h at the same temperature, the precipitate was filtrated, the filter residue was washed with cooled ethanol and cooled H<sub>2</sub>O.

The **S3** was dissolved in a mixture of dry acetonitrile (200 mL) and toluene (20 mL). To the solution was added manganese powder (300 mesh; 2.2 g, 40 mmol), and the resulting mixture was cooled to 0 °C before trifluoroacetic acid (7.6 mL, 80 mmol) was added dropwise over a period of 30 min under an Ar atmosphere. The reaction mixture was stirred vigorously at 20 °C for 24 h followed by addition of two additional equivalents of trifluoroacetic acid at 0 °C. After standing at that temperature

for 2 h, the resulting mixture was filtered and the residue was washed with petroleum ether (bp 60-90 °C, 10 mL×2) to afford a white solid. The solid was dissolved in H<sub>2</sub>O (10 mL) and neutralized with saturated NaHCO<sub>3</sub> solution to pH = 8. The aqueous solution was extracted with dichloromethane (20 mL×3). The combined organic layer was washed with H<sub>2</sub>O (10 mL), dried over anhydrous Na<sub>2</sub>SO<sub>4</sub>, and concentrated. The resulting product can be applied directly to the next step reaction without further purification .

**S4** (12 mmol) was dissolved in THF (20 mL), which was added dropwise to the solution of sodium hydride (80% purity, 0.86 g, 28.8 mmol) at 0 °C. After stirring at the same temperature for 3 h. Iodomethane (1.86 mL, 30 mmol) was added to the above mixture at the same temperature and the resulting mixture was stirred at room temperature for 12 h. A solution of 1M aqueous NaHSO<sub>3</sub> was added slowly to quench the reaction. The aqueous phase was extracted with dichloromethane (3×20 mL). Combined organic layers were dried over Na<sub>2</sub>SO<sub>4</sub> and concentrated under reduced pressure. The residue was purified by silica gel column chromatography (petroleum/acetate, 20/1 to 5/1) to give the targeted compound.

To a solution of **S5** (10 mmol) in 20 mL THF at -78 °C was dropwise added 10 mL (25 mmol) of 2.5 M solution of *n*-BuLi in hexanes. The resulting solution was stirred at -78 °C for 1 h, and then a solution of 4.5 mL of chlorodiphenylphosphine (25 mmol) in 20 mL of THF was added dropwise during 15 mins. The reaction mixture was stirred for another 3 h at the same temperature, and then warmed at room temperature. After stirring for another 4 h, a solution of 1M aqueous NH<sub>4</sub>Cl was added slowly until the reaction mixture became clear in both phases. The aqueous phase was extracted with dichloromethane (3×20 mL). Combined organic layers were dried over Na<sub>2</sub>SO<sub>4</sub> and concentrated under reduced pressure. The residue was purified by silica gel column chromatography (petroleum/acetate, 20/1 to 5/1) to give the targeted compound.

**N,N'-((1R,2R)-cyclohexane-1,2-diyl)bis(1-(3-bromophenyl)methanimine) (S3a):**

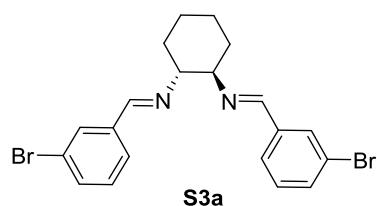

White solid, Yield: 89%.  $[\alpha]_D^{25} = -194.1$  ( $c = 2.32$ ,  $\text{CHCl}_3$ ).  $^1\text{H}$  NMR (400 MHz,  $\text{CDCl}_3$ )  $\delta$  8.11 (s, 2H), 7.79 (s, 2H), 7.44 (dd,  $J = 7.8, 1.3$  Hz, 4H), 7.17 (t,  $J = 7.8$  Hz, 2H), 3.44 – 3.33 (m, 2H), 1.93 – 1.73 (m, 6H), 1.48 (t,  $J = 9.1$  Hz, 2H).  $^{13}\text{C}$  NMR (101 MHz,  $\text{CDCl}_3$ )  $\delta$  159.40, 138.29, 133.23, 130.36, 129.99, 126.89, 122.82, 73.74, 32.82, 24.40. HRMS (ESI) calcd. for  $\text{C}_{20}\text{H}_{20}\text{Br}_2\text{N}_2[\text{M}+\text{H}]^+$ : 447.0066, Found: 447.0068.

**N,N'-((1R,2R)-cyclohexane-1,2-diyl)bis(1-(4-bromophenyl)methanimine) (S3b):**

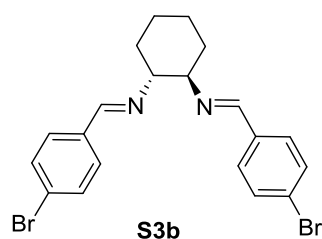

White solid, Yield: 83%.  $[\alpha]_D^{25} = -253.7$  ( $c = 2.37$ ,  $\text{CHCl}_3$ ).  $^1\text{H}$  NMR (400 MHz,  $\text{CDCl}_3$ )  $\delta$  8.10 (s, 2H), 7.49 – 7.38 (m, 8H), 3.44 – 3.28 (m, 2H), 1.93 – 1.73 (m, 6H), 1.48 (t,  $J = 9.0$  Hz, 2H).  $^{13}\text{C}$  NMR (101 MHz,  $\text{CDCl}_3$ )  $\delta$  159.73, 135.15, 131.68, 129.32, 124.69, 73.77, 32.81, 24.42. HRMS (ESI) calcd. for  $\text{C}_{20}\text{H}_{20}\text{Br}_2\text{N}_2[\text{M}+\text{H}]^+$ : 447.0066, Found: 447.0066.

**(2S,3S,5R,6R)-2,3-bis(3-bromophenyl)-1,4-dimethyldecahydroquinoxaline (S5a):**

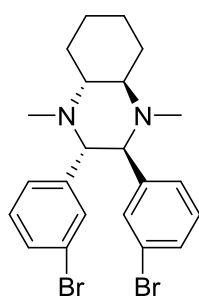

White solid, Yield: 78%.  $[\alpha]_D^{25} = -104.1$  ( $c = 2.32$ ,  $\text{CHCl}_3$ ).  $^1\text{H}$  NMR (400 MHz,  $\text{CDCl}_3$ )  $\delta$  7.63 – 6.39 (m, 8H), 3.05 (s, 2H), 2.21 (d,  $J = 13.0$  Hz, 2H), 2.07 (d,  $J = 8.9$  Hz, 2H), 1.97 (s, 6H), 1.80 (d,  $J = 8.0$  Hz, 2H), 1.38 – 1.14 (m, 4H).  $^{13}\text{C}$  NMR (101 MHz,  $\text{CDCl}_3$ )  $\delta$  144.19, 131.35, 130.06, 129.24, 127.66, 122.07, 75.75, 67.31, 39.90, 29.50, 24.92. HRMS (ESI) calcd. for  $\text{C}_{22}\text{H}_{26}\text{Br}_2\text{N}_2[\text{M}+\text{H}]^+$ :

477.0536, Found: 447.0538.

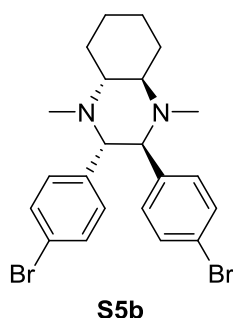

**(2S,3S,5R,6R)-2,3-bis(4-bromophenyl)-1,4-dimethyldecahydroquinoxaline (S5b):** White solid, Yield: 70%.  $[\alpha]_D^{25} = -139.0$  ( $c$

= 2.23, CHCl<sub>3</sub>). <sup>1</sup>H NMR (400 MHz, CDCl<sub>3</sub>) δ 7.60 – 6.37 (m, 8H), 3.05 (s, 2H), 2.21 (d, *J* = 13.0 Hz, 2H), 2.07 (d, *J* = 8.9 Hz, 2H), 1.97 (s, 6H), 1.80 (d, *J* = 8.0 Hz, 2H), 1.39 – 1.14 (m, 4H). <sup>13</sup>C NMR (101 MHz, CDCl<sub>3</sub>) δ 144.19, 131.35, 130.06, 129.24, 127.66, 122.07, 75.75, 67.31, 39.90, 29.50, 24.92. HRMS (ESI) calcd. for C<sub>22</sub>H<sub>26</sub>Br<sub>2</sub>N<sub>2</sub>[M+H]<sup>+</sup>: 477.0536, Found: 447.0537.

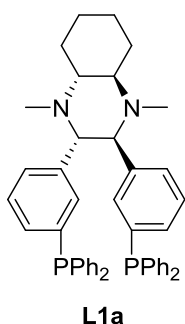

**(2S,3S,5R,6R)-2,3-bis(3-(diphenylphosphanyl)phenyl)-1,4-dimethyldecahydroquinoxaline (L1a):** White solid, Yield: 78%. [ $\alpha$ ]<sub>D</sub><sup>25</sup> = -135.8 (*c* = 2.32, CHCl<sub>3</sub>). <sup>1</sup>H NMR (400 MHz, CDCl<sub>3</sub>) δ 7.59 – 6.67 (m, 28H), 3.10 (s, 2H), 2.16 (d, *J* = 12.4 Hz, 2H), 2.03 (d, *J* = 10.0 Hz, 2H), 1.90 (s, 6H), 1.75 (d, *J* = 8.1 Hz, 2H), 1.33 – 1.12 (m, 4H). <sup>13</sup>C NMR (101 MHz, CDCl<sub>3</sub>) δ 142.04, 137.46, 137.35, 133.87, 133.66, 133.47, 128.58, 128.50, 128.44, 128.38, 75.85, 67.58, 39.66, 29.54, 24.98. HRMS (ESI) calcd. for C<sub>46</sub>H<sub>46</sub>N<sub>2</sub>P<sub>2</sub>[M+H]<sup>+</sup>: 689.3209, Found: 689.3211.

**(2S,3S,5R,6R)-2,3-bis(4-(diphenylphosphanyl)phenyl)-1,4-dimethyldecahydroquinoxaline (L1b):**

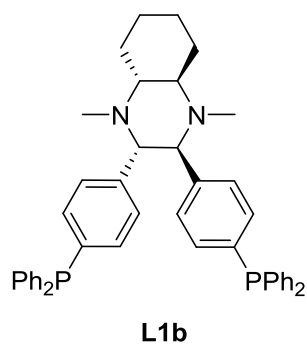

**noxaline (L1b):** White solid, Yield: 68%. [ $\alpha$ ]<sub>D</sub><sup>25</sup> = -288.5 (*c* = 2.32, CHCl<sub>3</sub>). <sup>1</sup>H NMR (400 MHz, CDCl<sub>3</sub>) δ 7.56 – 6.73 (m, 28H), 3.14 (s, 2H), 2.21 (d, *J* = 11.6 Hz, 2H), 2.10 (s, 2H), 1.99 (s, 6H), 1.78 (d, *J* = 6.7 Hz, 2H), 1.40 – 1.28 (m, 3H), 1.24 – 1.19 (m, 1H). <sup>13</sup>C NMR (101 MHz, CDCl<sub>3</sub>) δ 137.40, 137.30, 137.11, 137.00, 133.83, 133.64, 133.44, 133.25, 128.66, 128.50, 128.43, 128.37, 76.06, 67.55, 39.95, 29.51, 24.96. HRMS (ESI) calcd. for C<sub>46</sub>H<sub>46</sub>N<sub>2</sub>P<sub>2</sub>[M+H]<sup>+</sup>: 689.3209, Found: 689.3207.

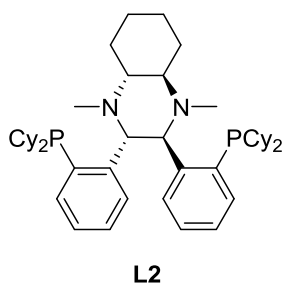

**(2S,3S,5R,6R)-2,3-bis(2-(dicyclohexylphosphanyl)phenyl)-1,4-dimethyldecahydroquinoxaline (L2):** White solid, Yield: 79%. [ $\alpha$ ]<sub>D</sub><sup>25</sup> = -11.2 (*c* = 2.32, CHCl<sub>3</sub>). <sup>1</sup>H NMR (400

MHz, CDCl<sub>3</sub>) δ 8.00 (d, *J* = 6.2 Hz, 2H), 7.38 – 7.08 (m, 6H), 4.90 – 4.74 (m, 2H), 2.26 (d, *J* = 9.1 Hz, 2H), 2.15 (d, *J* = 12.2 Hz, 2H), 1.80 (s, 6H), 1.77 – 1.28 (m, 22H), 1.22 – 0.93 (m, 17H), 0.81 (dd, *J* = 26.1, 13.7 Hz, 4H), 0.37 (t, *J* = 11.1 Hz, 2H), 0.09 (q, *J* = 12.4 Hz, 2H). HRMS (ESI) calcd. for C<sub>46</sub>H<sub>70</sub>N<sub>2</sub>P<sub>2</sub>[M+H]<sup>+</sup>: 713.5087, Found: 713.5081.

### 3. General procedures for Pd-catalyzed asymmetric allylation alkylation to the formation of products 2a-2f, 3a-3j, 5a-5g and 6a-6g.

#### 3.1 General procedure for Pd-catalyzed asymmetric allylic etherification of alcohols in the presence of (2*S*,3*S*,5*R*,6*R*)-**Fei-Phos**.

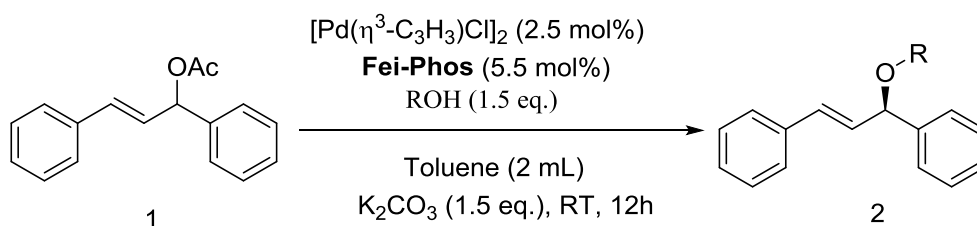

A flame-dried Schlenk tube was charged with [Pd( $\eta^3$ -allyl)Cl]<sub>2</sub> (4.5 mg, 0.0125 mmol, 2.5 mol%) and (2*S*,3*S*,5*R*,6*R*)-**Fei-Phos** (18.9 mg, 0.0275 mmol, 5.5 mol%) under N<sub>2</sub> atmosphere, and the mixture was dissolved in dry Toluene (2.0 mL). The solution was stirred at room temperature for 30 min and then adding (*E*)-1,3-diphenyl-2-propenyl acetate (0.5 mmol). The mixture solution was further stirred for 10 minutes at room temperature, and anhydrous K<sub>2</sub>CO<sub>3</sub> (104 mg, 0.75 mmol) was added in to the vial followed by alcohol (0.75 mmol). The reaction mixture was stirred at room temperature for 12 h. The solution was quenched with EtOAc and saturated aqueous NH<sub>4</sub>Cl solution. The mixture was then extracted twice with EtOAc (20×3 mL), dried over anhydrous Na<sub>2</sub>SO<sub>4</sub>, and concentrated in vacuo. The crude product was purified by flash column chromatography to afford the product.

The product of catalytic asymmetric allylic etherification in the previous report.<sup>[2]</sup>

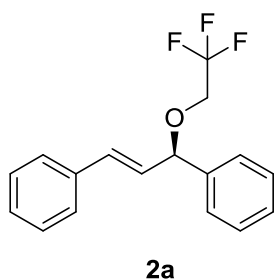

**(*R,E*)-(3-(2,2,2-trifluoroethoxy)prop-1-ene-1,3-diyl)dibenzene (2a):** Yellow oil, Yield: 98%.  $[\alpha]_D^{25} = 6.5$  ( $c = 4.35$ ,  $\text{CHCl}_3$ ), 31% *ee* [determined by HPLC analysis using a Chiralcel OJ-H column; *n*-Hex / *i*-PrOH = 98:2, 1 mL/min, 254 nm;  $t_R$  (minor) = 16.65 min;  $t_R$  (major) = 20.20 min].  $^1\text{H}$  NMR (400 MHz,  $\text{CDCl}_3$ )  $\delta$  7.41 – 7.19 (m, 11H), 6.64 (d,  $J = 15.9$  Hz, 1H), 6.27 (dd,  $J = 15.9, 7.2$  Hz, 1H), 5.07 (d,  $J = 7.2$  Hz, 1H), 3.90 – 3.79 (m, 2H).  $^{13}\text{C}$  NMR (101 MHz,  $\text{CDCl}_3$ )  $\delta$  139.60, 136.12, 132.90, 128.78, 128.66, 128.53, 128.32, 128.19, 126.91, 126.78, 124.21 (q,  $J = 278.9$  Hz), 83.82, 65.51 (q,  $J = 34.2$  Hz). HRMS (ESI) calcd. for  $\text{C}_{17}\text{H}_{14}\text{F}_3\text{O}[\text{M}+\text{Na}]^+$ : 315.0967, Found: 315.0962.

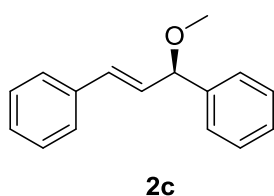

**(*R,E*)-(3-methoxyprop-1-ene-1,3-diyl)dibenzene (2c):** Colorless oil, Yield: 95%.  $[\alpha]_D^{25} = 7.3$  ( $c = 5.26$ ,  $\text{CHCl}_3$ ), 97% *ee* [determined by HPLC analysis using a Chiralcel OJ-H column; *n*-Hex / *i*-PrOH = 96:4, 1 mL/min, 254 nm;  $t_R$  (minor) = 10.43 min;  $t_R$  (major) = 11.00 min].  $^1\text{H}$  NMR (400 MHz,  $\text{CDCl}_3$ )  $\delta$  7.38 – 7.08 (m, 10H), 6.54 (d,  $J = 15.9$  Hz, 1H), 6.19 (dd,  $J = 15.9, 7.0$  Hz, 1H), 4.70 (d,  $J = 7.0$  Hz, 1H), 3.28 (d,  $J = 1.2$  Hz, 3H).  $^{13}\text{C}$  NMR (101 MHz,  $\text{CDCl}_3$ )  $\delta$  141.12, 136.68, 131.51, 130.25, 128.56, 127.75, 126.90, 126.64, 84.36, 56.47. HRMS (ESI) calcd. for  $\text{C}_{16}\text{H}_{16}\text{O}[\text{M}+\text{Na}]^+$ : 247.1093, Found: 247.0944.

### 3.2 General procedure for Pd-catalyzed asymmetric allylic alkylation of cyanoacetates in the presence of (2*S*,3*S*,5*R*,6*R*)-Fei-Phos.

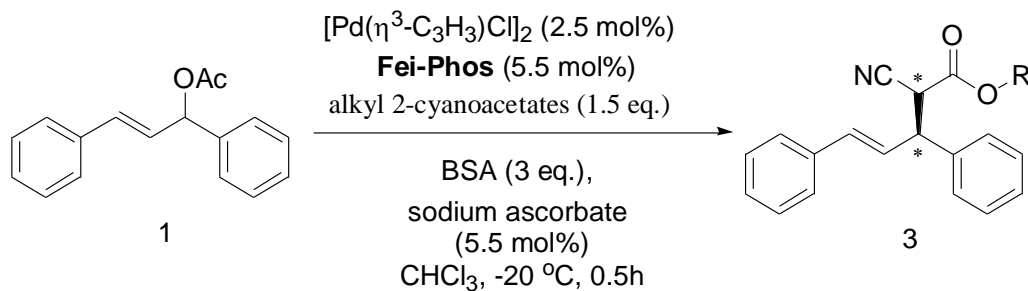



A flame-dried Schlenk tube was charged with  $[\text{Pd}(\eta^3\text{-allyl})\text{Cl}]_2$  (4.5 mg, 0.0125 mmol, 2.5 mol%) and (2*S*,3*S*,5*R*,6*R*)-**Fei-Phos** (18.9 mg, 0.0275 mmol, 5.5 mol%) and sodium ascorbate (5.4 mg, 0.0275 mmol, 5.5mol%) under an  $\text{N}_2$  atmosphere, and the mixture was dissolved in dry  $\text{CHCl}_3$  (2.0 mL). The solution was stirred at  $-20\text{ }^\circ\text{C}$  for 30 min and then (*E*)-1,3-diphenyl-2-propenyl acetate (0.5 mmol), cyanoacetate (0.75 mmol), BSA (1.5 mmol) was added to the above solution. The reaction mixture was stirred at  $-20\text{ }^\circ\text{C}$  for 30 min. The solution was quenched with EtOAc and saturated aqueous  $\text{NH}_4\text{Cl}$  solution. The mixture was then extracted twice with EtOAc (20×3 mL), dried over anhydrous  $\text{Na}_2\text{SO}_4$ , and concentrated in vacuo. The crude product was purified by flash column chromatography to afford the alkylated product.

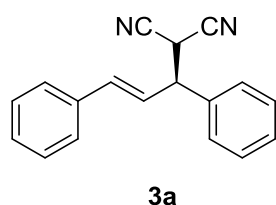

**(*S,E*)-2-(1,3-diphenylallyl)malononitrile (3a):** Light yellow oil, Yield: 72%.  $[\alpha]_{\text{D}}^{25} = 24.2$  ( $c = 3.33$ ,  $\text{CHCl}_3$ ), 92% *ee* [determined by HPLC analysis using a Chiralcel OJ-H column; *n*-Hex / *i*-PrOH = 70:30, 1 mL/min, 254 nm;  $t_{\text{R}}$  (minor) = 17.85 min;  $t_{\text{R}}$  (major) = 20.00 min].  $^1\text{H}$  NMR (400 MHz,  $\text{CDCl}_3$ )  $\delta$  7.51 – 7.25 (m, 10H), 6.71 (d,  $J = 15.7$  Hz, 1H), 6.47 (dd,  $J = 15.7, 8.0$  Hz, 1H), 4.15 – 3.99 (m, 2H).  $^{13}\text{C}$  NMR (101 MHz,  $\text{CDCl}_3$ )  $\delta$  135.09, 134.34, 134.01, 127.93, 127.45, 127.23, 127.12, 126.21, 125.29, 122.45, 110.19, 110.11, 48.30, 28.70. HRMS (ESI) calcd. for  $\text{C}_{18}\text{H}_{14}\text{N}_2[\text{M}+\text{Na}]^+$ : 281.1049, Found: 281.1039.

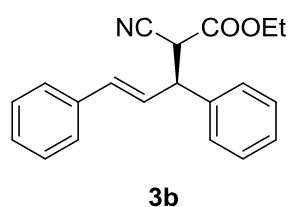

**(*E*)-ethyl-2-cyano-3,5-diphenylpent-4-enoate (3b):** Colorless oil, Yield: 92%.  $[\alpha]_{\text{D}}^{25} = 19.2$  ( $c = 7.22$ ,  $\text{CHCl}_3$ ), 90% *ee*, *dr* > 99:1 [determined by HPLC analysis using a Chiralcel IB column; *n*-Hex / *i*-PrOH = 99:1, 0.5 mL/min, 254 nm;  $t_{\text{R}}$  (minor) = 29.93 min;  $t_{\text{R}}$  (major) = 34.36 min].  $^1\text{H}$  NMR (400 MHz,  $\text{CDCl}_3$ )  $\delta$  7.47 – 7.20 (m, 10H), 6.59 (dd,  $J = 15.7, 11.5$  Hz, 1H), 6.48 (ddd,  $J = 31.0, 15.7, 8.3$  Hz, 1H), 4.24 (dd,  $J = 8.2, 6.5$  Hz, 1H), 4.18 – 4.10 (m, 2H), 3.90 (dd,  $J = 15.4, 7.0$  Hz, 1H), 1.16 (td,  $J = 7.1, 3.8$  Hz, 3H).  $^{13}\text{C}$  NMR (101 MHz,  $\text{CDCl}_3$ )  $\delta$  164.95, 164.91, 138.80,

138.12, 136.23, 136.16, 134.35, 133.28, 129.09, 129.06, 128.68, 128.66, 128.19, 128.15, 128.03, 127.72, 127.10, 126.68, 126.58, 125.75, 115.49, 62.93, 62.88, 49.47, 49.22, 44.88, 44.55, 13.97.

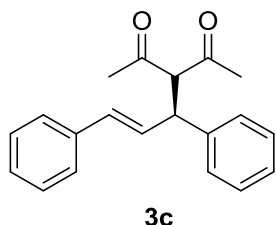

**(*S,E*)-3-(1,3-diphenylallyl)pentane-2,4-dione (3c):** White solid, Yield: 92%.  $[\alpha]_D^{25} = 4.7$  ( $c = 7.06$ ,  $\text{CHCl}_3$ ), 94% *ee* [determined by HPLC analysis using a Chiralcel AD-H column; *n*-Hex / *i*-PrOH = 95:5, 1 mL/min, 254 nm;  $t_R$  (minor) = 10.73 min;  $t_R$  (major) = 11.92 min].  $^1\text{H}$  NMR (400 MHz,  $\text{CDCl}_3$ )  $\delta$  7.41 – 7.11 (m, 3H), 6.42 (d,  $J = 15.9$  Hz, 1H), 6.19 (ddd,  $J = 15.8, 4.7, 3.1$  Hz, 1H), 4.51 – 4.14 (m, 1H), 2.24 (s, 1H), 1.91 (s, 1H).  $^{13}\text{C}$  NMR (101 MHz,  $\text{CDCl}_3$ )  $\delta$  202.74, 202.58, 140.18, 136.63, 131.72, 129.36, 129.02, 128.53, 127.96, 127.71, 127.26, 126.38, 74.55, 49.16, 29.97, 29.71. HRMS (ESI) calcd. for  $\text{C}_{20}\text{H}_{20}\text{O}_2[\text{M}+\text{Na}]^+$ : 315.1356, Found: 315.1340.

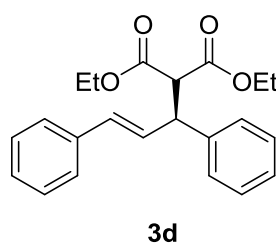

**diethyl (*S,E*)-2-(1,3-diphenylallyl)malonate (3d):** Yield: 90%. 94% *ee* [determined by HPLC analysis using a Chiralcel AD-H column; *n*-Hex / *i*-PrOH = 90:10, 1 mL/min, 254 nm;  $t_R$  (minor) = 9.67 min;  $t_R$  (major) = 12.88 min].  $^1\text{H}$  NMR (400 MHz,  $\text{CDCl}_3$ )  $\delta$  7.41 – 7.11 (m, 10H), 6.47 (d,  $J = 15.8$  Hz, 1H), 6.34 (dd,  $J = 15.7, 8.5$  Hz, 1H), 4.26 (dd,  $J = 10.9, 8.5$  Hz, 1H), 4.17 (q,  $J = 7.2$  Hz, 2H), 3.97 (qd,  $J = 7.1, 1.4$  Hz, 2H), 3.92 (d,  $J = 10.9$  Hz, 1H), 1.20 (t,  $J = 7.1$  Hz, 3H), 1.00 (t,  $J = 7.1$  Hz, 3H).  $^{13}\text{C}$  NMR (101 MHz,  $\text{CDCl}_3$ )  $\delta$  167.85, 167.43, 140.36, 136.90, 131.71, 129.41, 128.65, 128.47, 128.02, 127.52, 127.09, 126.37, 61.57, 61.36, 57.82, 49.22, 14.14, 13.79.

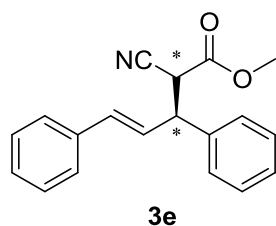

**methyl (*E*)-2-cyano-3,5-diphenyl-pent-4-enoate (3e):** Colorless oil, Yield: 86%.  $[\alpha]_D^{25} = 26.5$  ( $c = 5.23$   $\text{CHCl}_3$ ), 91% *ee*, *dr* > 99:1 [determined by HPLC analysis using a Chiralcel IB column; *n*-Hex / *i*-PrOH = 99:1, 0.5 mL/min, 254 nm;  $t_R$

(minor) = 40.54 min;  $t_R$  (major) = 46.56 min].  $^1\text{H}$  NMR (400 MHz,  $\text{CDCl}_3$ )  $\delta$  7.42 – 7.21 (m, 10H), 6.59 (dd,  $J = 15.8, 10.0$  Hz, 1H), 6.48 (ddd,  $J = 31.9, 15.7, 8.3$  Hz, 1H), 4.27 – 4.17 (m, 1H), 3.93 (dd,  $J = 16.8, 6.8$  Hz, 1H), 3.71 (d,  $J = 7.8$  Hz, 3H).  $^{13}\text{C}$  NMR (100 MHz,  $\text{CDCl}_3$ )  $\delta$  165.42, 165.39, 138.82, 138.08, 136.26, 136.19, 134.41, 133.33, 129.11, 129.07, 128.68, 128.65, 128.21, 128.16, 128.05, 127.98, 127.66, 127.05, 126.69, 126.60, 125.69, 115.33, 115.27, 53.49, 53.41, 49.37, 49.09, 44.75, 44.43.

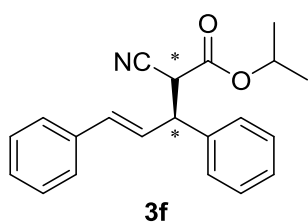

**isopropyl (*E*)-2-cyano-3,5-diphenyl-pent-4-enoate (3f):**

Light yellow oil, Yield: 83%.  $[\alpha]_D^{25} = 19.2$  ( $c = 4.47$   $\text{CHCl}_3$ ), 90%/92% *ee*, 54:46 *dr* [determined by HPLC analysis using a Chiralcel IC column; *n*-Hex / *i*-PrOH = 99:1, 0.5 mL/min, 254 nm;  $t_R = 51.30$  min,  $t_R = 54.49$  min,  $t_R = 59.28$  min,  $t_R = 85.69$  min].  $^1\text{H}$  NMR (400 MHz,  $\text{CDCl}_3$ )  $\delta$  7.42 – 7.23 (m, 10H), 6.58 (dd,  $J = 15.7, 12.4$  Hz, 1H), 6.54 – 6.39 (m, 1H), 4.97 (hept,  $J = 6.2$  Hz, 1H), 4.25 – 4.13 (m, 1H), 3.87 (dd,  $J = 13.3, 7.2$  Hz, 1H), 1.19 – 1.08 (m, 6H).  $^{13}\text{C}$  NMR (101 MHz,  $\text{CDCl}_3$ )  $\delta$  164.48, 164.44, 138.78, 138.19, 136.23, 136.16, 134.28, 133.25, 129.07, 129.05, 128.68, 128.66, 128.16, 128.13, 128.06, 128.01, 127.78, 127.18, 126.67, 126.58, 125.87, 115.59, 71.06, 49.55, 49.36, 45.00, 44.68, 21.55, 21.53, 21.48, 21.42.

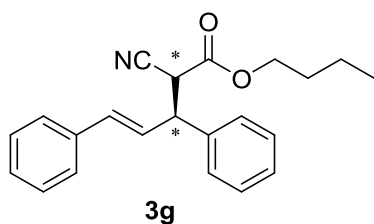

**butyl (*E*)-2-cyano-3,5-diphenyl-pent-4-enoate (3g):**

Light yellow oil, Yield: 84%.  $[\alpha]_D^{25} = 18.4$  ( $c = 4.65$   $\text{CHCl}_3$ ), 92%/88% *ee*, 54:46 *dr* [determined by HPLC analysis using a Chiralcel IC column; *n*-Hex / *i*-PrOH = 99:1, 0.5 mL/min, 254 nm;  $t_R = 50.27$  min,  $t_R = 53.74$  min,  $t_R = 64.58$  min,  $t_R = 83.84$  min].  $^1\text{H}$  NMR (400 MHz,  $\text{CDCl}_3$ )  $\delta$  7.43 – 7.22 (m, 10H), 6.59 (dd,  $J = 15.8, 10.3$  Hz, 1H), 6.48 (ddd,  $J = 31.7, 15.7, 8.2$  Hz, 1H), 4.26 – 4.16 (m, 1H), 4.09 (dd,  $J = 6.0, 4.6$  Hz, 1H), 3.91 (dd,  $J = 14.0, 6.9$  Hz, 1H), 1.51 (dq,  $J = 13.7, 6.9$  Hz, 2H), 1.35 – 1.19 (m, 2H), 0.83 (td,  $J = 7.3, 1.4$  Hz, 3H).  $^{13}\text{C}$  NMR (101 MHz,  $\text{CDCl}_3$ )  $\delta$  165.02, 164.98,

138.86, 138.17, 136.25, 136.19, 134.36, 133.29, 129.07, 129.03, 128.65, 128.62, 128.11, 128.02, 127.6, 127.14, 126.67, 126.58, 125.72, 115.41, 66.71, 66.66, 49.46, 49.22, 44.88, 44.56, 30.36, 29.71, 18.92, 13.52.

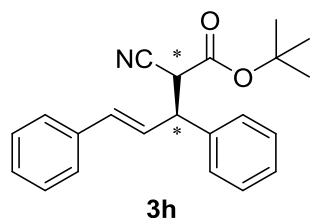

**tert-butyl (*E*)-2-cyano-3,5-diphenyl-pent-4-enoate (3h):**

Light yellow oil, Yield: 80%.  $[\alpha]_D^{25} = 22.1$  ( $c = 2.26$   $\text{CHCl}_3$ ), 94%/94% *ee*, 54:46 *dr* [determined by HPLC analysis using a Chiralcel IC column; *n*-Hex / *i*-PrOH = 99:1, 0.5 mL/min, 254 nm;  $t_R = 34.00$  min,  $t_R = 36.30$  min,  $t_R = 43.35$  min,  $t_R = 52.63$  min].  $^1\text{H}$  NMR (400 MHz,  $\text{CDCl}_3$ )  $\delta$  7.41 – 7.16 (m, 10H), 6.57 (t,  $J = 15.2$  Hz, 1H), 6.46 (ddd,  $J = 28.4, 15.7, 8.3$  Hz, 1H), 4.23 – 4.07 (m, 1H), 3.81 (dd,  $J = 12.1, 7.3$  Hz, 1H), 1.34 (s, 9H).  $^{13}\text{C}$  NMR (101 MHz,  $\text{CDCl}_3$ )  $\delta$  163.84, 163.78, 138.88, 138.32, 136.28, 136.22, 134.13, 133.10, 129.02, 128.98, 128.67, 128.66, 128.14, 128.08, 127.94, 127.83, 127.44, 126.64, 126.56, 126.13, 115.88, 84.33, 49.51, 49.44, 45.61, 45.30, 27.72, 27.69.

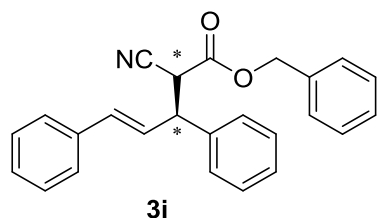

**benzyl (*E*)-2-cyano-3,5-diphenyl-pent-4-enoate (3i):**

Light yellow oil, Yield: 89%.  $[\alpha]_D^{25} = 16.9$  ( $c = 6.67$   $\text{CHCl}_3$ ), 90%/92% *ee*, 55:45 *dr* [determined by HPLC analysis using a Chiralcel IC column; *n*-Hex / *i*-PrOH = 99:1, 0.5 mL/min, 254 nm;  $t_R = 72.33$  min,  $t_R = 87.46$  min,  $t_R = 103.01$  min,  $t_R = 113.32$  min].  $^1\text{H}$  NMR (400 MHz,  $\text{CDCl}_3$ )  $\delta$  7.38 – 7.15 (m, 15H), 6.55 – 6.50 (m, 1H), 6.50 – 6.35 (m, 1H), 5.15 – 5.07 (m, 2H), 4.20 (dt,  $J = 16.1, 7.2$  Hz, 1H), 3.94 (dd,  $J = 12.7, 7.0$  Hz, 1H).  $^{13}\text{C}$  NMR (101 MHz,  $\text{CDCl}_3$ )  $\delta$  164.86, 164.83, 138.69, 137.99, 136.14, 136.08, 134.47, 134.36, 134.30, 133.35, 129.12, 129.11, 128.78, 128.73, 128.70, 128.68, 128.65, 128.62, 128.55, 128.20, 128.16, 128.15, 128.05, 127.96, 127.68, 126.91, 126.73, 126.63, 125.49, 115.28, 115.26, 68.48, 49.52, 49.19, 44.93, 44.57.

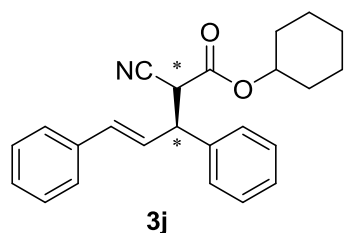

**cyclohexyl (E)-2-cyano-3,5-diphenyl-pent-4-enoate**

**(3j):** White solid, Yield: 88%.  $[\alpha]_D^{25} = 27.9$  ( $c = 6.93$   $\text{CHCl}_3$ ), 94%/94% *ee*, 54:46 *dr* [determined by HPLC analysis using a Chiralcel IC column; *n*-Hex / *i*-PrOH =

99:1, 0.5 mL/min, 254 nm;  $t_R = 47.99$  min,  $t_R = 51.77$  min,  $t_R = 62.21$  min,  $t_R = 79.37$  min].  $^1\text{H NMR}$  (400 MHz,  $\text{CDCl}_3$ )  $\delta$  7.43 – 7.28 (m, 9H), 7.26 – 7.21 (m, 1H), 6.60 (d,  $J = 15.8$  Hz, 1H), 6.51 (dd,  $J = 16.2, 8.7$  Hz, 1H), 4.84 – 4.69 (m, 1H), 4.23 (t,  $J = 7.3$  Hz, 1H), 3.87 (d,  $J = 7.3$  Hz, 1H), 1.74 – 1.26 (m, 10H).  $^{13}\text{C NMR}$  (100 MHz,  $\text{CDCl}_3$ )  $\delta$  164.36, 138.88, 136.28, 134.27, 129.03, 128.60, 128.06, 127.95, 127.74, 126.63, 125.93, 115.53, 75.56, 49.29, 45.01, 31.16, 31.07, 25.15, 23.31. HRMS (ESI) calcd. for  $\text{C}_{24}\text{H}_{25}\text{NO}_2[\text{M}+\text{Na}]$ : 382.1778, Found: 382.1785.

### 3.3 General procedure for Pd-catalyzed asymmetric allylic alkylation of indoles in the presence of (2*S*,3*S*,5*R*,6*R*)-Fei-Phos.

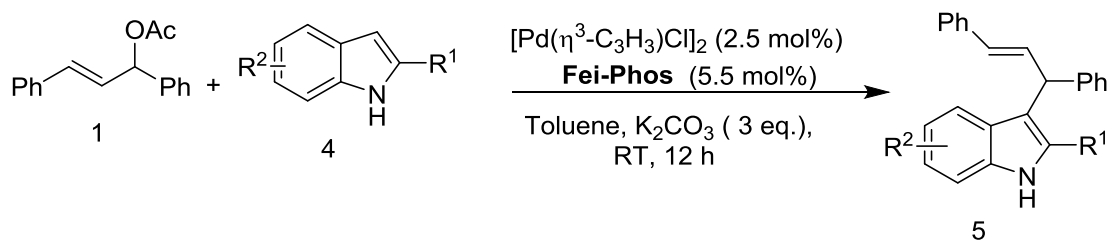

A flame-dried Schlenk tube was charged with  $[\text{Pd}(\eta^3\text{-allyl})\text{Cl}]_2$  (4.5 mg, 0.0125 mmol, 2.5 mol%) and (2*S*,3*S*,5*R*,6*R*)-**Fei-Phos** (18.9 mg, 0.0275 mmol, 5.5 mol%) under an  $\text{N}_2$  atmosphere, and the mixture was dissolved in dry toluene (2.0 mL). The solution was stirred at room temperature for 30 min and then adding (*E*)-1,3-diphenyl-2-propenyl acetate **1** (126 mg, 0.5 mmol). The mixture solution was further stirred for 10 minutes at room temperature, and anhydrous  $\text{K}_2\text{CO}_3$  (207 mg, 1.5 mmol) was added in to the vial followed by indoles **4** (1.5 mmol). The reaction mixture was stirred at room temperature for 12 h. The solution was quenched with EtOAc and saturated aqueous  $\text{NH}_4\text{Cl}$  solution. The mixture was then extracted twice with EtOAc ( $20 \times 3$  mL), dried over anhydrous  $\text{Na}_2\text{SO}_4$ , and concentrated in vacuo.

The crude product was purified by flash column chromatography to afford the alkylated product **5**. And the product **5** was directly converted to *N*-Boc-protected derivatives **6**.

### 3.4 The preparation of *N*-Boc-protected indoles **6**

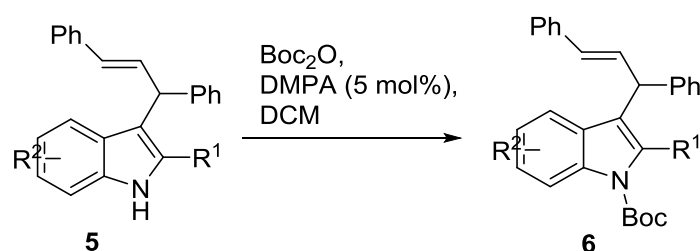

To a solution of **5** (0.1 mmol) and DMAP (0.6 mg, 0.005 mmol) in  $\text{CH}_2\text{Cl}_2$  (2 mL) was added  $(\text{Boc})_2\text{O}$  (32.7 mg, 0.15 mmol), and the solution was stirred for 2 h at room temperature. The resulting mixture was evaporated under reduced pressure and purified by flash column chromatography to afford the *N*-Boc-protected alkylated indole **6**. Enantiomeric excess was determined on an aliquot before the addition of the acetic anhydride by HPLC with chiral stationary phase.

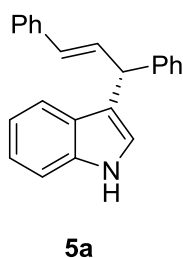

**(*R,E*)-3-(1,3-diphenylallyl)-1H-indole (**5a**):** White solid, 124-127 °C. 82% yield.  $[\alpha]_{\text{D}}^{25} = -38.3$  ( $c = 0.6$ ,  $\text{CDCl}_3$ ).  $^1\text{H NMR}$  (500 MHz,  $\text{CDCl}_3$ )  $\delta$  7.89 (bs, 1H), 7.48-7.33 (m, 9H), 7.32-7.20 (m, 3H), 7.15-7.07 (m, 1H), 6.82 (d,  $J = 3.75\text{Hz}$ , 1H), 6.85-6.75 (m, 1H), 6.56-6.48 (m, 1H), 5.23-5.15 (m, 1H).  $^{13}\text{C NMR}$  (125 MHz,  $\text{CDCl}_3$ )

$\delta$  143.5, 137.6, 136.7, 132.7, 130.6, 128.6, 127.3, 126.9, 126.5, 126.4, 122.7, 122.1, 119.9, 119.5, 118.7, 111.2, 46.3. IR ( $\text{cm}^{-1}$ , neat) 3384.5, 3022.1, 2852.2, 1597.7, 1489.4, 1449.4, 1419.2, 1335.1, 1220.5, 1007.5, 962.9, 742.3, 694.3.

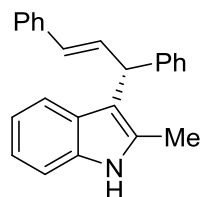

**(*R,E*)-3-(1,3-diphenylallyl)-2-methyl-1H-indole (**5b**):** Yellow solid, GC-MS (EI): calcd for  $\text{C}_{23}\text{H}_{19}\text{N}$  [ $M$ ]: 309.1; Found: 309.2, 254.1, 232.1, 206.1, 178.1, 152.1, 115.1.

**(*R,E*)-3-(1,3-diphenylallyl)-2-methyl-1H-indole (**5b**):** Yellow solid,

mp: 39-40 °C. 80% yield. <sup>1</sup>H NMR (500 MHz, CDCl<sub>3</sub>) δ 7.89 (bs, 1H), 7.49-7.44 (m, 6H), 7.39-7.34 (m, 5H), 7.33-7.30 (m, 1H), 7.19-7.15 (m, 1H), 7.10-7.05 (m, 1H), 6.94 (dd, J = 7.0 Hz, 32.0 Hz, 1H), 6.52 (d, J = 31.5 Hz, 1H), 5.24 (d, J = 7.5 Hz, 1H), 2.39 (s, 3H). <sup>13</sup>C NMR (125 MHz, CDCl<sub>3</sub>) δ 143.6, 137.7, 135.5, 132.3, 130.7, 129.8, 129.1, 128.6, 128.4, 128.3, 128.0, 127.2, 126.4, 126.2, 120.9, 119.4, 119.3, 112.8, 110.5, 45.2, 12.4. IR (cm<sup>-1</sup>, neat) 3338.43, 3058.2, 3027.6, 2924.7, 1685.1, 1616.4, 1491.1, 1450.0, 1264.4, 968.7, 734.1, 696.9.

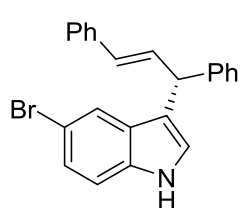

**5c**

**(*R,E*)-5-bromo-3-(1,3-diphenylallyl)-1H-indole (5c):**

Colorless oil. 81% yield.  $[\alpha]_D^{25} = -28.1$  ( $c = 0.85$ , CDCl<sub>3</sub>). <sup>1</sup>H NMR (500 MHz, CDCl<sub>3</sub>) δ 8.00 (bs, 1H), 7.67-7.63 (m, 1H), 7.45-7.29 (m, 11H), 7.21-7.17 (m, 1H), 6.89 (s, 1H), 6.76 (dd, J = 7.5 Hz, 16.0 Hz, 1H), 6.50 (d, J = 16.0 Hz, 1H), 5.13 (d, J = 7.0 Hz, 1H). <sup>13</sup>C NMR (125 MHz, CDCl<sub>3</sub>) δ 143.1, 137.4, 135.3, 132.2, 130.9, 128.6, 128.5, 127.5, 126.7, 126.5, 125.1, 124.0, 122.3, 118.3, 112.8, 46.0. IR (cm<sup>-1</sup>, neat) 3420.4, 3024.5, 2921.4, 2851.0, 1693.0, 1492.4, 1449.1, 1213.5, 1094.7, 1028.4, 882.2, 794.9, 695.3.

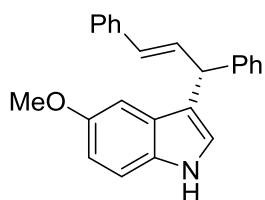

**5d**

**(*R,E*)-3-(1,3-diphenylallyl)-5-methoxy-1H-indole (5d):**

Colorless oil. 88% yield.  $[\alpha]_D^{25} = -30.2$  ( $c = 0.9$ , CDCl<sub>3</sub>). The product **5d** was directly converted to *N*-Boc-protected derivatives **6d**.

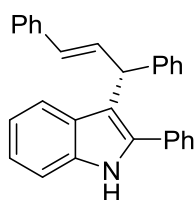

**5e**

**(*R,E*)-3-(1,3-diphenylallyl)-2-phenyl-1H-indole (5e):**

Yellow oil. 85% yield.  $[\alpha]_D^{25} = -36.4$  ( $c = 0.7$ , CDCl<sub>3</sub>). The product **5e** was directly converted to *N*-Boc-protected derivatives **6e**.

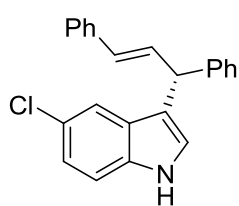

**5f**

**(*R,E*)-5-chloro-3-(1,3-diphenylallyl)-1H-indole (5f):** Yellow oil. 80% yield.  $[\alpha]_D^{25} = -28.9$  ( $c = 0.8$ ,  $\text{CDCl}_3$ ). The product **5f** was directly converted to *N*-Boc-protected derivatives **6f**.

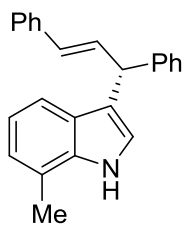

**5g**

**(*R,E*)-3-(1,3-diphenylallyl)-7-methyl-1H-indole (5g):** Yellow oil. 80% yield.  $[\alpha]_D^{25} = -14.1$  ( $c = 0.5$ ,  $\text{CDCl}_3$ ).  $^1\text{H}$  NMR (500 MHz,  $\text{CDCl}_3$ )  $\delta$  7.86 (bs, 1H), 7.52-7.47 (m, 4H), 7.47-7.31 (m, 7H), 7.14-7.09 (m, 2H), 6.93 (d,  $J = 1.5$  Hz, 1H), 6.88 (dd,  $J = 7.5$  Hz, 16.0 Hz, 1H), 6.59 (d,  $J = 15.5$  Hz, 1H), 5.26 (d,  $J = 7.5$  Hz, 1H),

2.55 (s, 3H).  $^{13}\text{C}$  NMR (125 MHz,  $\text{CDCl}_3$ )  $\delta$  143.6, 137.7, 136.4, 132.8, 130.7, 128.7, 128.6, 127.4, 126.6, 126.5, 122.7, 122.6, 120.4, 119.8, 119.2, 117.8, 46.5, 16.7. IR ( $\text{cm}^{-1}$ , neat) 3427.3, 3026.1, 2964.1, 2964.2, 2921.2, 2853.4, 2245.7, 1598.5, 1493.3, 1449.4, 1340.5, 1029.1, 905.7, 786.8, 726.5, 695.6.

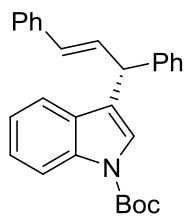

**6a**

**(*R,E*)-tert-butyl 3-(1,3-diphenylallyl)-1H-indole-1-carboxylate (6a):**

White solid, 56-58 °C. 79% yield, 96% *ee*.  $[\alpha]_D^{25} = -31.7$  ( $c = 1.2$ ,  $\text{CDCl}_3$ ). HPLC conditions: chiralcel OD-H, n-hexane/2-propanol = 99/1, 0.7 mL/min, 254 nm. minor enantiomer:  $t_R = 7.53$  min (S); major enantiomer:  $t_R = 8.51$  min (R).  $^1\text{H}$  NMR (500 MHz,  $\text{CDCl}_3$ )  $\delta$  8.33-8.21 (m, 1H), 7.55-7.52 (m, 1H), 7.47-7.28 (m, 12H), 7.25-7.21 (m, 1H), 6.82 (dd,  $J = 7.5$  Hz, 16.0 Hz, 1H), 6.56 (d,  $J = 15.5$  Hz, 1H), 5.15 (d,  $J = 7.0$  Hz, 1H), 1.77 (s, 9H).  $^{13}\text{C}$  NMR (125 MHz,  $\text{CDCl}_3$ )  $\delta$  150.0, 142.2, 137.3, 131.4, 131.3, 130.0, 129.1, 128.7, 128.6, 128.5, 127.5, 126.8, 126.5, 124.5, 123.9, 122.6, 120.3, 115.4, 83.8, 46.1, 28.3. IR ( $\text{cm}^{-1}$ , neat) 3057.4, 2976.4, 2930.4, 1727.7, 1599.7, 1450.5, 1368.2, 1308.0, 1254.4, 1150.4, 1074.1, 966.8, 852.4, 742.8. GC-MS (EI): calcd for  $\text{C}_{28}\text{H}_{27}\text{NO}_2$  [M]: 409.2; Found: 309.2, 268.0, 232.1, 204.1, 165.0, 130.1, 91.0.



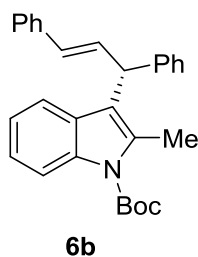

**(R,E)-tert-butyl**

**3-(1,3-diphenylallyl)-2-methyl-1H-indole-1-carboxylate (6b):**

White solid, mp: 130-132 °C. 75% yield, 99% *ee*.  $[\alpha]_D^{25} = -8.5$  ( $c = 0.6$ ,  $\text{CDCl}_3$ ). HPLC conditions: chiralcel OJ-H, n-hexane/2-propanol = 80/20, 0.3 mL/min, 254 nm. major enantiomer:  $t_R = 20.48$  min (R); minor enantiomer:  $t_R = 26.93$  min (S).  $^1\text{H}$  NMR (500 MHz,  $\text{CDCl}_3$ )  $\delta$  8.23-8.19 (m, 1H), 7.46-7.42 (m, 2H), 7.42-7.38 (m, 2H), 7.37-7.32 (m, 5H), 7.29-7.25 (m, 3H), 7.16-7.11 (m, 1H), 6.87 (dd,  $J=7.5$  Hz, 16.0 Hz, 1H), 6.53 (d,  $J = 16.0$  Hz, 1H), 5.25 (d,  $J = 7.5$  Hz, 1H), 2.68 (s, 3H), 1.75 (s, 9H).  $^{13}\text{C}$  NMR (125 MHz,  $\text{CDCl}_3$ )  $\delta$  150.8, 142.5, 137.3, 136.1, 134.1, 131.6, 130.7, 129.0, 128.6, 128.4, 128.1, 127.3, 126.4, 126.3, 123.2, 122.3, 119.6, 119.3, 115.5, 83.7, 44.6, 28.4, 14.43. IR ( $\text{cm}^{-1}$ , neat) 3025.6, 2976.2, 2929.7, 1727.3, 1599.2, 1492.8, 1455.6, 1392.8, 1365.0, 1116.0, 964.5, 842.0, 743.6, 694.9. GC-MS (EI): calcd for  $\text{C}_{29}\text{H}_{29}\text{NO}_2$  [M]: 423.2; Found: 323.2, 291.1, 246.1, 218.1, 191.1, 144.1, 116.1.

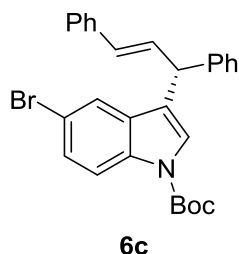

**(R,E)-tert-butyl-5-bromo-3-(1,3-diphenylallyl)-1H-indole-1-carboxylate (6c):** White solid, 152-153 °C. 78% yield, 94% *ee*.

$[\alpha]_D^{25} = -28.8$  ( $c = 0.8$ ,  $\text{CDCl}_3$ ). HPLC conditions: chiralcel OJ-H, n-hexane/2-propanol = 99/1, 0.5 mL/min, 254 nm. minor enantiomer:  $t_R = 11.75$  min (S); major enantiomer:  $t_R = 12.77$  min (R).  $^1\text{H}$  NMR (500 MHz,  $\text{CDCl}_3$ )  $\delta$  8.09-7.95 (m, 1H), 7.51-7.47 (m, 1H), 7.44-7.37 (m, 4H), 7.37-7.28 (m, 7H), 7.27-7.22 (m, 1H), 6.71-6.64 (m, 1H), 6.44 (d,  $J = 15.5$  Hz, 1H), 5.01 (d,  $J = 7.5$  Hz, 1H), 1.68 (s, 9H).  $^{13}\text{C}$  NMR (125 MHz,  $\text{CDCl}_3$ )  $\delta$  149.5, 141.6, 137.1, 131.6, 131.5, 130.8, 128.7, 128.6, 128.4, 127.5, 127.3, 126.9, 126.4, 124.9, 122.6, 122.4, 116.7, 115.9, 84.2, 45.7, 28.4. IR ( $\text{cm}^{-1}$ , neat) 3025.8, 2977.0, 1732.1, 1600.1, 1447.4, 1367.1, 1275.5, 1150.5, 1028.5, 786.5, 695.7. GC-MS (EI): calcd for  $\text{C}_{28}\text{H}_{26}\text{BrNO}_2$  [M]: 487.1; Found: 389.1, 310.0, 284.0, 255.1, 230.1, 191.0, 154.0, 115.0.

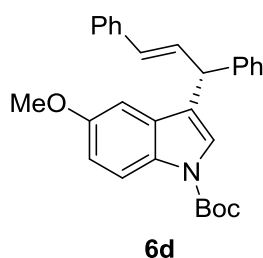

**(*R,E*)-tert-butyl-3-(1,3-diphenylallyl)-5-methoxy-1H-indole-**

**1-carboxylate (6d):** White solid, 124-126 °C. 77% yield, 98% *ee*.  $[\alpha]_D^{25} = -41.1$  ( $c = 0.56$ ,  $\text{CDCl}_3$ ). HPLC conditions: chiralcel OD-H, n-hexane/2-propanol = 99/1, 0.7 mL/min, 254 nm. minor enantiomer:  $t_R = 10.25$  min (S); major enantiomer:

$t_R = 11.89$  min (R).  $^1\text{H NMR}$  (500 MHz,  $\text{CDCl}_3$ )  $\delta$  8.03(s, 1H), 7.43-7.30 (m, 9H), 7.30-7.22 (m, 2H), 6.96-6.91 (m, 1H), 6.83-6.79 (m, 1H), 6.75-6.68 (m, 1H), 6.48 (d,  $J = 15.5$  Hz, 1H), 5.03 (d,  $J = 7.0$  Hz, 1H), 3.74 (s, 3H), 1.69 (s, 9H).  $^{13}\text{C NMR}$  (125 MHz,  $\text{CDCl}_3$ )  $\delta$  155.6, 149.9, 142.0, 137.2, 131.4, 131.1, 128.6, 128.5, 128.4, 127.4, 126.7, 126.4, 124.5, 122.8, 115.9, 112.8, 103.1, 83.5, 55.6, 46.0, 28.3. IR ( $\text{cm}^{-1}$ , neat) 2974.3, 2010.0, 1730.7, 1474.7, 1445.0, 1372.0, 1253.0, 1150.8, 1072.6, 968.6, 917.8, 699.8. GC-MS (EI): calcd for  $\text{C}_{29}\text{H}_{29}\text{NO}_3$  [M]: 439.2; Found: 339.2, 308.2, 262.1, 218.1, 191.0, 160.0, 115.0.

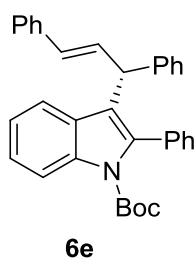

**(*R,E*)-tert-butyl-3-(1,3-diphenylallyl)-2-phenyl-1H-indole-1-carb**

**oxylate (6e):** White solid, mp: 153-155 °C. 78% yield, 95% *ee*.  $[\alpha]_D^{25} = -22.2$  ( $c = 0.87$ ,  $\text{CDCl}_3$ ). HPLC conditions: chiralcel AD-H, n-hexane/2-propanol = 99/1, 1.0 mL/min, 254 nm. minor nantiomer:  $t_R = 3.74$  min (S) ; major enantiomer:  $t_R = 9.16$  min (R).  $^1\text{H NMR}$

(500 MHz,  $\text{CDCl}_3$ )  $\delta$  8.35-8.30 (m, 1H), 7.49-7.39 (m, 5H), 7.38-7.26 (m, 10H), 7.25-7.18 (m, 2H), 7.17-7.11 (m, 1H), 6.83-6.75 (m, 1H), 6.35 (d,  $J = 16.0$  Hz, 1H), 4.89 (d,  $J = 5.5$  Hz, 1H), 1.28-1.25 (m, 9H).  $^{13}\text{C NMR}$  (125 MHz,  $\text{CDCl}_3$ )  $\delta$  150.2, 142.6, 137.4, 137.0, 136.6, 134.3, 131.6, 130.7, 130.1, 128.5, 128.3, 128.1, 128.0, 127.8, 127.3, 126.4, 126.3, 124.3, 122.6, 121.3, 120.9, 115.4, 83.1, 44.9, 27.5. IR ( $\text{cm}^{-1}$ , neat) 3027.0, 2921.2, 2850.8, 1719.4, 1454.0, 1325.7, 1150.1, 1027.1, 964.9, 830.7, 748.1, 693.7.

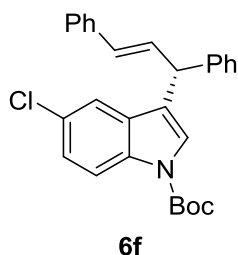

**(*R,E*)-tert-butyl-5-chloro-3-(1,3-diphenylallyl)-1H-indole-1-carboxylate (6f):** White solid, mp: 54-56 °C. 75% yield, 92% *ee*.  $[\alpha]_D^{25} = -14.6$  ( $c = 0.7$ ,  $\text{CDCl}_3$ ). HPLC conditions: chiralcel OD-H, n-hexane/2-propanol = 99/1, 0.5 mL/min, 254 nm. minor enantiomer:  $t_R = 10.07$  min (S) ; major enantiomer:  $t_R = 10.98$  min

(R).  $^1\text{H NMR}$  (500 MHz,  $\text{CDCl}_3$ )  $\delta$  8.10 (s, 1H), 7.46-7.26 (m, 13H), 6.70 (dd,  $J = 7.5$  Hz, 16.0 Hz, H), 6.47 (d,  $J = 15.5$  Hz, 1H), 5.03 (d,  $J = 7.0$  Hz, 1H), 1.70 (s, 9H).  $^{13}\text{C NMR}$  (125 MHz,  $\text{CDCl}_3$ )  $\delta$  149.6, 141.7, 137.1, 131.6, 131.1, 130.8, 128.8, 128.6, 128.2, 127.5, 127.0, 126.5, 125.1, 124.6, 122.5, 119.7, 116.4, 84.2, 45.8, 28.2. IR ( $\text{cm}^{-1}$ , neat) 3027.4, 2976.4, 2927.4, 1735.1, 1491.7, 1332.6, 1243.1, 1030.5, 842.1, 754.5, 694.6.

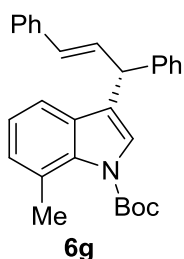

**(*R,E*)-tert-butyl-3-(1,3-diphenylallyl)-7-methyl-1H-indole-1-carboxylate (6g):** White solid, mp: 123-125 °C. 76% yield, 91% *ee*. HPLC conditions: chiralcel OD-H, n-hexane/2-propanol = 97/3, 0.7 mL/min, 254 nm. minor enantiomer:  $t_R = 6.22$  min (S) ; major enantiomer:  $t_R = 6.73$  min (R).  $^1\text{H NMR}$  (500 MHz,  $\text{CDCl}_3$ )  $\delta$  7.51-7.33 (m, 12H),

7.24-7.18 (m, 2H), 6.85 (dd,  $J = 7.5$  Hz, 16.0 Hz, H), 6.59 (d,  $J = 15.5$  Hz, 1H), 5.17 (d,  $J = 7.5$  Hz, 1H), 2.80 (s, 3H), 1.75 (s, 9H).  $^{13}\text{C NMR}$  (125 MHz,  $\text{CDCl}_3$ )  $\delta$  149.9, 142.3, 137.4, 135.6, 131.5, 131.3, 128.7, 128.6, 127.9, 127.5, 126.8, 126.2, 125.5, 123.1, 122.8, 117.9, 83.5, 28.2, 22.4.

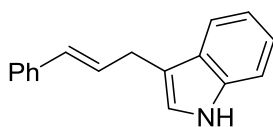

**3-cinnamyl-1H-indole (6h),** white solid, Yield: 78%.  $^1\text{H NMR}$  (400 MHz,  $\text{CDCl}_3$ )  $\delta$  7.85 (s, 1H), 7.63 (d,  $J = 7.9$  Hz, 1H), 7.37 – 7.08 (m, 8H), 6.53 (d,  $J = 15.9$  Hz, 1H), 6.45 (dt,  $J = 15.7, 6.2$  Hz, 1H), 3.67 (d,  $J = 6.1$  Hz, 2H).  $^{13}\text{C NMR}$  (101 MHz,  $\text{CDCl}_3$ )  $\delta$  137.09, 135.80, 129.79, 128.65, 127.83, 126.82, 126.29, 125.46, 121.40, 121.12,

118.70, 118.47, 113.96, 110.45, 76.70, 76.38, 76.06, 28.31. HRMS (ESI) calcd. for  $C_{17}H_{16}N[M+H]^+$ : 234.1277, Found: 234.1125.

### 3.5 General procedures for Pd-catalyzed asymmetric allylic amination of aniline

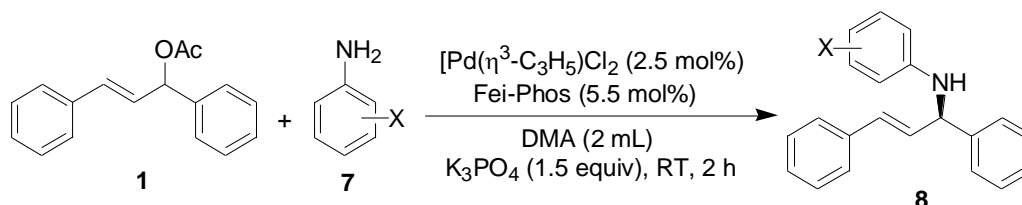

A flame-dried Schlenk tube was charged with  $[Pd(\eta^3\text{-allyl})Cl]_2$  (4.5 mg, 0.0125 mmol, 2.5 mol%) and (2*S*,3*S*,5*R*,6*R*)-Fei-Phos (18.9 mg, 0.0275 mmol, 5.5 mol%) under an  $N_2$  atmosphere, and the mixture was dissolved in dry *N,N*-dimethylacetamide (2.0 mL). The solution was stirred at room temperature for 30 min and then adding (*E*)-1,3-diphenyl-2-propenyl acetate (0.5 mmol). The mixture solution was further stirred for 10 minutes at room temperature, and anhydrous  $K_3PO_4$  (160 mg, 0.75 mmol) was added in to the vial followed by aniline (0.75 mmol). The reaction mixture was stirred at room temperature for 2 h. The solution was quenched with EtOAc and saturated aqueous  $NH_4Cl$  solution. The mixture was then extracted twice with EtOAc (20×3 mL), dried over anhydrous  $Na_2SO_4$ , and concentrated in vacuo. The crude product was purified by flash column chromatography to afford the product **8**.

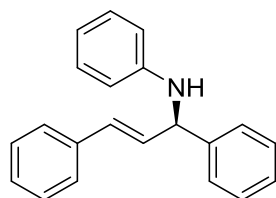

**(R)-N-(1,3-diphenylallyl)aniline (8a)**, yellow oil, Yield: 97%.  $[\alpha]_D^{25} = -31.3$  ( $c = 5.25$ ,  $CHCl_3$ ), 83% *ee* [determined by HPLC analysis using a Chiralcel AD-H column; *n*-Hex / *i*-PrOH = 95:5, 1.0 mL/min, 254 nm;  $t_R$  (major) = 10.00 min;  $t_R$  (minor)

=12.23 min].  $^1\text{H}$  NMR (400 MHz,  $\text{CDCl}_3$ )  $\delta$  7.33 (d,  $J = 7.1$  Hz, 2H), 7.27 – 7.01 (m, 10H), 6.61 (t,  $J = 7.3$  Hz, 1H), 6.55–6.49 (m, 3H), 6.29 (dd,  $J = 15.8, 6.2$  Hz, 1H), 4.98 (d,  $J = 6.2$  Hz, 1H), 4.15 (s, 1H).  $^{13}\text{C}$  NMR (100 MHz,  $\text{CDCl}_3$ )  $\delta$  147.08, 142.00, 136.66, 131.18, 130.67, 129.14, 128.81, 128.53, 127.66, 127.53, 127.23, 126.52, 117.87, 113.77, 60.77. IR (neat,  $\text{cm}^{-1}$ ) 3408, 3081, 3054, 3028, 1600, 1501, 1449, 1426, 1384, 1313, 1260, 1179, 967, 746, 692. HRMS (ESI) calcd. for  $\text{C}_{21}\text{H}_{19}\text{N}[\text{M}+\text{H}]^+$ : 286.1590, Found:286.1621.

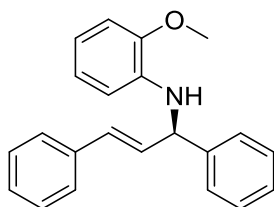

**(R)-N-(1,3-diphenylallyl)-2-methoxyaniline (8b)**, white solid, Yield: 95%.  $[\alpha]_{\text{D}}^{25} = -29.6$  ( $c = 70.6$ ,  $\text{CHCl}_3$ ), 77% *ee* [determined by HPLC analysis using a Chiralcel AD-H column; *n*-Hex / *i*-PrOH = 98:2, 1.0 mL/min, 254 nm;  $t_{\text{R}}$  (minor) = 7.96 min;  $t_{\text{R}}$  (major) = 9.12 min].  $^1\text{H}$  NMR (400 MHz,  $\text{CDCl}_3$ )  $\delta$  7.44 (t,  $J = 5.7$  Hz, 2H), 7.38 – 7.14 (m, 9H), 6.80 – 6.72 (m, 2H), 6.70 – 6.55 (m, 3H), 6.47 – 6.38 (m, 1H), 5.08 (d,  $J = 5.8$  Hz, 1H), 4.90 (s, 1H), 3.84 (d,  $J = 4.0$  Hz, 3H).  $^{13}\text{C}$  NMR (100 MHz,  $\text{CDCl}_3$ )  $\delta$  147.04, 142.24, 137.05, 136.86, 131.11, 131.05, 128.82, 128.57, 127.66, 127.48, 127.31, 126.61, 121.26, 117.14, 111.65, 109.52, 60.73, 55.50. IR (neat,  $\text{cm}^{-1}$ ) 3434, 3024, 1637, 1600, 1507, 1447, 1421, 1236, 1219, 1178, 1139, 1048, 1024, 967, 741, 698. HRMS (ESI) calcd. for  $\text{C}_{22}\text{H}_{21}\text{NO}[\text{M}+\text{H}]^+$ : 316.1696, Found: 316.1703.

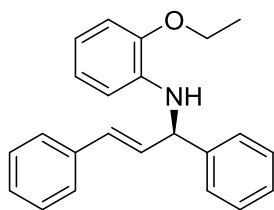

**(R)-N-(1,3-diphenylallyl)-2-ethoxyaniline (8c)**, orange oil, Yield: 97%.  $[\alpha]_{\text{D}}^{25} = -33.9$  ( $c = 73.3$ ,  $\text{CHCl}_3$ ), 81% *ee* [determined by HPLC analysis using a Chiralcel AD-H column; *n*-Hex / *i*-PrOH = 95:5, 1.0 mL/min, 254 nm;  $t_{\text{R}}$  (major) = 12.98 min;  $t_{\text{R}}$  (minor) = 18.45 min].  $^1\text{H}$  NMR (400 MHz,  $\text{CDCl}_3$ )  $\delta$  7.43 (d,  $J = 7.5$  Hz, 2H), 7.36 – 7.17 (m, 9H), 6.72 (d,  $J = 8.7$  Hz, 2H), 6.64 – 6.57 (m, 3H), 6.40 (dd,  $J = 15.8, 6.3$  Hz, 1H), 5.00 (d,  $J = 6.3$  Hz, 1H), 3.92 (q,  $J = 6.9$  Hz, 2H), 1.34 (t,  $J = 7.0$  Hz, 3H).  $^{13}\text{C}$  NMR (100 MHz,  $\text{CDCl}_3$ )  $\delta$  151.97, 142.04, 140.82, 136.74, 131.24, 130.87, 128.81, 128.55, 128.30, 127.66, 127.55, 127.34, 126.77, 126.56, 115.66, 115.52, 64.06, 62.06, 15.01. IR (neat,  $\text{cm}^{-1}$ ) 3545, 3057, 3026, 1619, 1509, 1478, 1449, 1385, 1235, 1117, 1049, 921, 817, 745, 699. HRMS (ESI) calcd. for  $\text{C}_{23}\text{H}_{23}\text{NO}[\text{M}+\text{Na}]^+$ : 352.1672, Found: 352.1693.

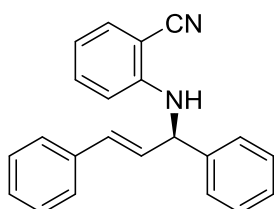

**(R)-2-((1,3-diphenylallyl)amino)benzonitrile (8d)**, white solid, Yield: 86%.  $[\alpha]_{\text{D}}^{25} = -44.7$  ( $c = 58.5$ ,  $\text{CHCl}_3$ ), 85% *ee* [determined by HPLC analysis using a Chiralcel OJ-H column; *n*-Hex / *i*-PrOH = 95:5, 1.0 mL/min, 254 nm;  $t_{\text{R}}$  (major) = 20.26 min;  $t_{\text{R}}$  (minor) = 22.88 min].  $^1\text{H}$  NMR (400 MHz,  $\text{CDCl}_3$ )  $\delta$  7.47 – 7.38 (m, 7H), 7.37 – 7.24 (m, 5H), 6.76 – 6.58 (m, 3H), 6.42 (dd,  $J = 15.9, 6.2$  Hz, 1H), 5.23 (d,  $J = 6.1$  Hz, 1H), 5.06 (s, 1H).  $^{13}\text{C}$  NMR (101 MHz,  $\text{CDCl}_3$ )  $\delta$  149.10, 140.57, 136.15, 134.12, 132.70, 132.08, 129.12, 129.07, 128.60, 128.01, 127.98, 127.01, 126.62, 117.13, 112.18, 96.41, 59.99. IR (neat,  $\text{cm}^{-1}$ ) 3406, 3333, 3081, 3025, 2854, 2213, 1633, 1575, 1506,

1450, 1321, 1274, 961, 745, 699. HRMS (ESI) calcd. for  $C_{22}H_{18}N_2[M+Na]^+$ : 333.1362, Found:333.1368.

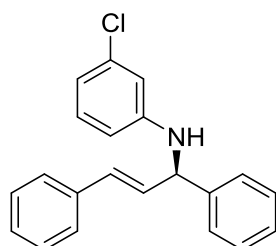

**(R)-3-chloro-N-(1,3-diphenylallyl)aniline (8e)**, yellow oil, Yield: 92%.  $[\alpha]_D^{25} = -34.4$  ( $c = 74.3$ ,  $CHCl_3$ ), 83% *ee* [determined by HPLC analysis using a Chiralcel OD-H column; *n*-Hex / *i*-PrOH = 90:10, 1.0 mL/min, 254 nm;  $t_R$  (minor) = 12.52 min;  $t_R$  (major) = 21.00 min].  $^1H$  NMR (400 MHz,  $CDCl_3$ )  $\delta$  7.41 – 7.21 (m, 13H), 7.02 (t,  $J = 8.0$  Hz, 1H), 6.68 – 6.56 (m, 3H), 6.49 (dd,  $J = 8.1, 1.8$  Hz, 1H), 6.36 (dd,  $J = 15.8, 6.2$  Hz, 1H), 5.05 (d,  $J = 6.2$  Hz, 1H), 4.33 (s, 1H).  $^{13}C$  NMR (100 MHz,  $CDCl_3$ )  $\delta$  148.30, 141.53, 136.56, 134.94, 131.52, 130.18, 130.10, 128.98, 128.64, 127.86, 127.80, 127.24, 126.62, 117.78, 113.54, 111.90, 60.53. IR (neat,  $cm^{-1}$ ) 3416, 3059, 3026, 2960, 1598, 1494, 1450, 1417, 1322, 1279, 1166, 1091, 1074, 1028, 966, 913, 838, 746, 698. HRMS (ESI) calcd. for  $C_{21}H_{18}ClN[M+H]^+$ : 320.1201, Found: 320.1200.

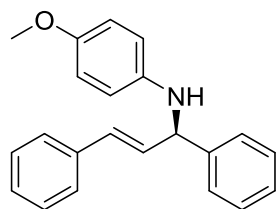

**(R)-N-(1,3-diphenylallyl)-4-methoxyaniline (8f)**, white solid, Yield: 95%.  $[\alpha]_D^{25} = -35.9$  ( $c = 68.5$ ,  $CHCl_3$ ), 81% *ee* [determined by HPLC analysis using a Chiralcel AD-H column; *n*-Hex / *i*-PrOH = 95:5, 1.0 mL/min, 254 nm;  $t_R$  (major) = 15.19 min;  $t_R$  (minor) = 20.84 min].  $^1H$  NMR (400 MHz,  $CDCl_3$ )  $\delta$  7.41 (d,  $J = 7.5$  Hz, 2H), 7.36 –

7.15 (m, 8H), 6.72 (d,  $J = 6.5$  Hz, 2H), 6.63 – 6.55 (m, 3H), 6.37 (dd,  $J = 15.8, 6.2$  Hz, 1H), 4.99 (d,  $J = 5.4$  Hz, 1H), 4.00 (s, 1H), 3.69 (s, 3H).  $^{13}\text{C}$  NMR (100 MHz,  $\text{CDCl}_3$ )  $\delta = 152.42, 142.27, 141.30, 136.74, 131.03, 128.79, 128.54, 127.63, 127.47, 127.24, 126.52, 115.15, 114.80, 61.71, 55.73$ . IR (neat,  $\text{cm}^{-1}$ ) 3440, 3024, 2835, 1636, 1509, 1448, 1312, 1248, 1180, 1032, 964, 825, 745, 697. HRMS (ESI) calcd. for  $\text{C}_{22}\text{H}_{21}\text{NO}[\text{M}+\text{Na}]^+$ : 338.1515, Found:338.1524.

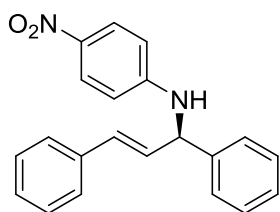

**(*R*)-N-(1,3-diphenylallyl)-4-nitroaniline (8g)**, yellow solid, Yield: 93%.  $[\alpha]_{\text{D}}^{25} = -74.1$  ( $c = 70.4, \text{CHCl}_3$ ), 86% *ee* [determined by HPLC analysis using a Chiralcel AD-H column; *n*-Hex / *i*-PrOH = 80:20, 1.0 mL/min, 254 nm;  $t_{\text{R}}$  (major) = 11.94 min;  $t_{\text{R}}$  (minor) = 13.63 min].  $^1\text{H}$  NMR (400 MHz,  $\text{CDCl}_3$ )  $\delta$  8.04 (d,  $J = 9.2$  Hz, 2H), 7.41 – 7.28 (m, 10H), 6.63 – 6.56 (m, 3H), 6.37 (dd,  $J = 15.9, 6.1$  Hz, 1H), 5.20 (d,  $J = 5.9$  Hz, 1H), 4.84 (s, 1H).  $^{13}\text{C}$  NMR (100 MHz,  $\text{CDCl}_3$ )  $\delta$  152.29, 140.39, 138.48, 136.12, 132.31, 129.18, 128.71, 128.18, 128.15, 127.16, 126.65, 126.26, 113.39, 112.19, 60.08. IR (neat,  $\text{cm}^{-1}$ ) 3447, 3208, 2916, 1630, 1502, 1468, 1384, 1309, 1182, 1111, 965, 831, 744, 695. HRMS (ESI) calcd. for  $\text{C}_{21}\text{H}_{18}\text{N}_2\text{O}_2[\text{M}+\text{Na}]^+$ : 353.1260, Found:353.1270.

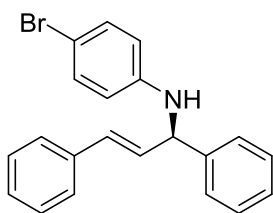



**(R)-4-bromo-N-(1,3-diphenylallyl)aniline (8h)**, yellow oil, Yield: 84%.  $[\alpha]_D^{25} = -37.4$  ( $c = 72.5$ ,  $\text{CHCl}_3$ ), 82% *ee* [determined by HPLC analysis using a Chiralcel AD-H column; *n*-Hex / *i*-PrOH = 90:10, 1.0 mL/min, 254 nm;  $t_R$  (major) = 9.52 min;  $t_R$  (minor) = 11.94 min].  $^1\text{H NMR}$  (400 MHz,  $\text{CDCl}_3$ )  $\delta$  7.43 – 7.27 (m, 9H), 7.25 – 7.17 (m, 4H), 6.57 (dd,  $J = 27.1, 12.3$  Hz, 3H), 6.37 (dd,  $J = 15.8, 6.3$  Hz, 1H), 5.03 (d,  $J = 6.2$  Hz, 1H).  $^{13}\text{C NMR}$  (100 MHz,  $\text{CDCl}_3$ )  $\delta$  145.91, 141.44, 136.51, 131.90, 131.58, 130.07, 128.95, 128.62, 127.85, 127.77, 127.23, 126.58, 115.51, 109.76, 60.87. IR (neat,  $\text{cm}^{-1}$ ) 3417, 3083, 2850, 1594, 1492, 1449, 1384, 1313, 1258, 1178, 1122, 967, 812, 746, 698. HRMS (ESI) calcd. for  $\text{C}_{21}\text{H}_{18}\text{BrN}[\text{M}+\text{H}]^+$ : 364.0695, Found: 364.0683.

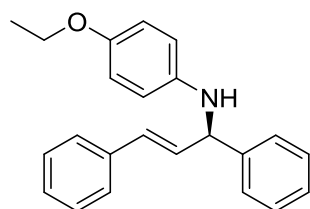

**(R)-N-(1,3-diphenylallyl)-4-ethoxyaniline (8i)**, yellow oil, Yield: 94%.  $[\alpha]_D^{25} = -33.5$  ( $c = 79.7$ ,  $\text{CHCl}_3$ ), 75% *ee* [determined by HPLC analysis using a Chiralcel AD-H column; *n*-Hex / *i*-PrOH = 95:5, 1.0 mL/min, 254 nm;  $t_R$  (major) = 12.97 min;  $t_R$  (minor) = 18.66 min].  $^1\text{H NMR}$  (400 MHz,  $\text{CDCl}_3$ )  $\delta$  7.42 (d,  $J = 7.1$  Hz, 2H), 7.36–7.17 (m, 9H), 6.72 (d,  $J = 8.9$  Hz, 2H), 6.61 (dd,  $J = 12.2, 3.2$  Hz, 3H), 6.40 (dd,  $J = 15.8, 6.4$  Hz, 1H), 4.99 (d,  $J = 6.3$  Hz, 1H), 3.92 (q,  $J = 7.0$  Hz, 2H), 1.34 (t,  $J = 7.0$  Hz, 3H).  $^{13}\text{C NMR}$  (100 MHz,  $\text{CDCl}_3$ )  $\delta$  151.96, 142.00, 136.71, 131.22, 130.82, 128.79, 128.53, 128.27, 127.64, 127.53, 127.32, 126.53, 115.62, 115.50, 64.03, 62.05, 14.99. HRMS (ESI) calcd. for  $\text{C}_{23}\text{H}_{23}\text{NO}[\text{M}+\text{Na}]^+$ : 352.1672, Found: 352.1635.

## References

- [1] a) Auburn, P. R.; Mackenzie, P. B.; Bosnich, B. *J. Am. Chem. Soc.* **1985**, *107*, 2033; b) Müller, C. A.; Pfaltz, A. *Angew. Chem. Int. Ed.* **2008**, *47*, 3363; c) Jiang, Z. Y.; Zhang, C. H.; Gu, F. L.; Yang, K. F.; Lai, G. Q.; Xu, L. W.; Xia, C. G. *Synlett* **2010**, 1251; d) Troshin, K.; Mayr, H. *J. Org. Chem.* **2013**, *78*, 2649.
- [2] Ye, F.; Zheng, Z. J.; Li, L.; Yang, K. F.; Xia, C. G.; Xu, L. W. *Chem. Eur. J.* **2013**, *19*, 15452-15457
- [3] Deng, W. H.; Ye, F.; Bai, X. F.; Zheng, Z. J.; Cui, Y. M.; Xu, L. W. *ChemCatChem* **2015**, *7*, 75-79

**Table S1.** Effect of the solvent on the catalytic asymmetric allylic alkylation of ethyl 2-cyanoacetate

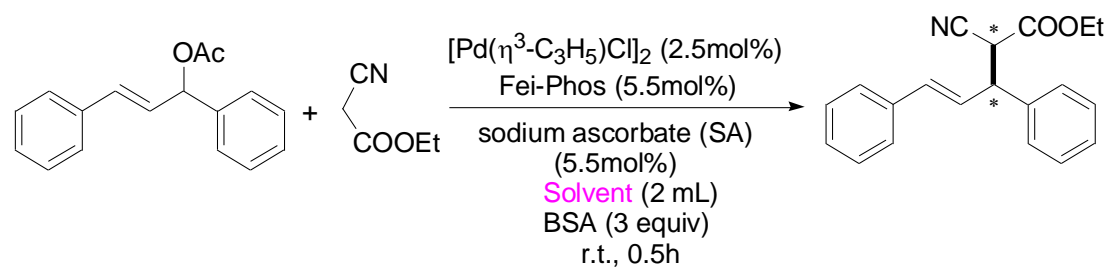

| Entry | solvent                         | conv.(%) | <i>Ee</i> (%) |
|-------|---------------------------------|----------|---------------|
| 1     | THF                             | >99      | 60            |
| 2     | CHCl <sub>3</sub>               | >99      | 88            |
| 3     | CH <sub>3</sub> CN              | >99      | 67            |
| 4     | DMA                             | 59       | 67            |
| 5     | Toluene                         | >99      | 45            |
| 6     | CH <sub>2</sub> Cl <sub>2</sub> | >99      | 79            |
| 7     | DME                             | >99      | 86            |

**Table S2.** Effect of the base on the catalytic asymmetric allylic alkylation of ethyl 2-cyanoacetate

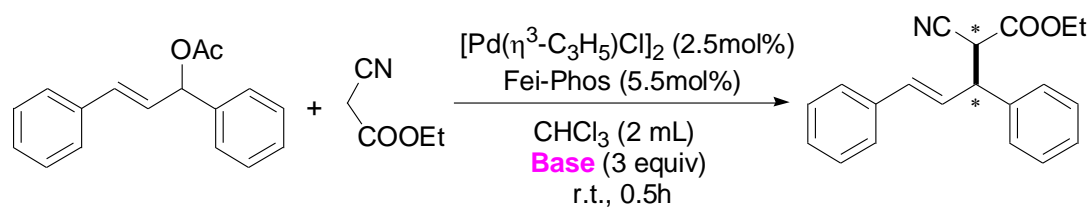

| Entry | Base                     | conv.(%) | <i>Ee</i> (%) |
|-------|--------------------------|----------|---------------|
| 1     | -                        | 66.7     | 63            |
| 2     | SA (5.5mol%)             | >99      | 88            |
|       | BSA                      |          |               |
| 3     | KOAc (5.5mol%)           | >99      | 76            |
|       | BSA                      |          |               |
| 4     | LiOAc (5.5mol%)          | >99      | 86            |
|       | BSA                      |          |               |
| 5     | TMEDA                    | >99      | 87            |
| 6     | $\text{K}_3\text{PO}_4$  | >99      | 87            |
| 7     | $\text{Cs}_2\text{CO}_3$ | >99      | 87            |
| 8     | $\text{K}_2\text{CO}_3$  | >99      | 87            |

**Table S3.** Effect of the dosage of catalyst on the catalytic asymmetric allylic alkylation of ethyl 2-cyanoacetate

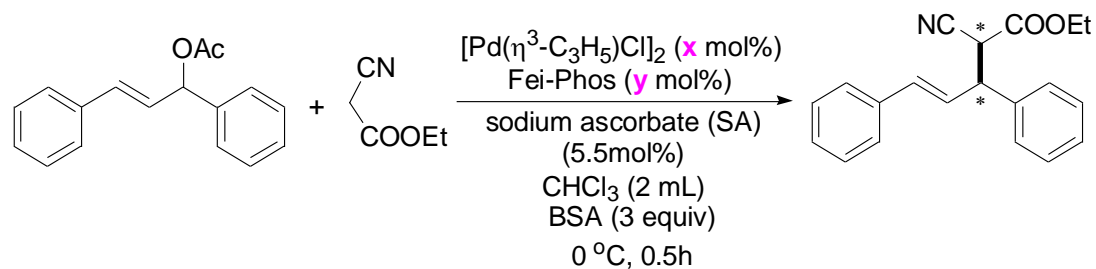

| entry | x   | y   | conv.(%) | ee(%) |
|-------|-----|-----|----------|-------|
| 1     | 2   | 4.4 | >99      | 88.1  |
| 2     | 2.5 | 5.5 | >99      | 89    |
| 3     | 3   | 6.6 | >99      | 88.5  |

**Table S4.** Effect of the temperature on the catalytic AAA of ethyl 2-cyanoacetate

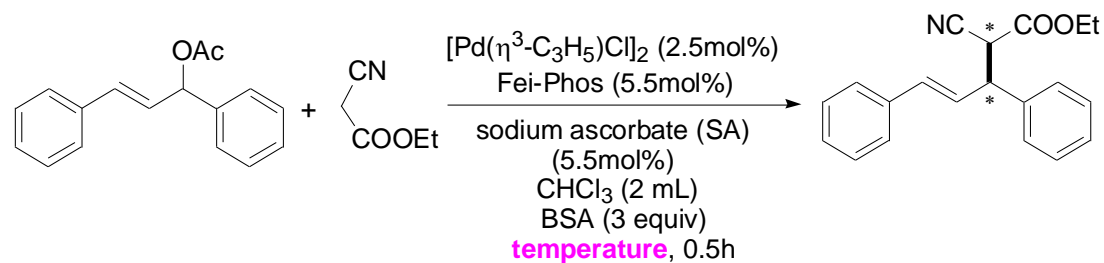

| entry | Temperature (°C) | conv.(%) | <i>Ee</i> (%) |
|-------|------------------|----------|---------------|
| 1     | r.t.             | >99      | 88            |
| 2     | 10               | >99      | 89            |
| 3     | 0                | >99      | 89            |
| 4     | -20              | 98       | 91            |
| 5     | -30              | 93       | 87            |

**Table S5.** Optimization of reaction conditions for catalytic AAA of indole.

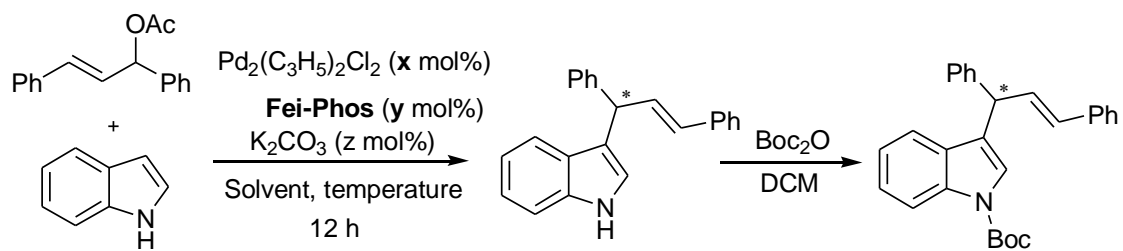

| Entry | [Pd]<br>(x mol%) | Fei-Phos<br>(y mol%) | Solvent                       | K <sub>2</sub> CO <sub>3</sub> | Temperature                         | Total<br>Yield % | Ee % |
|-------|------------------|----------------------|-------------------------------|--------------------------------|-------------------------------------|------------------|------|
| 1     | 4                | 5                    | toluene<br>(2.5M)             | 2 eq.                          | rt.                                 | 65               | 96   |
| 2     | 2                | 2.2                  | DCM<br>(3.75 M)               | 2 eq.                          | rt. For 12h<br>and<br>50 °C for 12h | 70               | 95   |
| 3     | 2                | 2.2                  | Et <sub>2</sub> O<br>(3.75 M) | 2 eq.                          | rt.                                 | 70               | 93   |
| 4     | 2                | 2.2                  | toluene<br>(5 M)              | 3 eq.                          | rt.                                 | 75               | 90   |
| 5     | 4                | 6                    | toluene<br>(5 M)              | 2 eq.                          | rt.                                 | 70               | 87   |
| 6     | 4                | 5                    | DCM<br>(5 M)                  | 2 eq.                          | 50 °C                               | 70               | 88   |
| 7     | 2                | 2.2                  | toluene<br>(5 M)              | 2 eq.                          | 50 °C                               | 65               | 94   |
| 8     | 8                | 12                   | toluene<br>(5 M)              | 2 eq.                          | rt.                                 | 65               | 86   |
| 9     | 4                | 6                    | DCM<br>(5 M)                  | 2 eq.                          | rt.                                 | 70               | 92   |

|    |   |     |                            |       |     |    |    |
|----|---|-----|----------------------------|-------|-----|----|----|
| 10 | 4 | 6   | Et <sub>2</sub> O<br>(5 M) | 2 eq. | rt. | 70 | 83 |
| 11 | 4 | 6   | EA<br>(5 M)                | 2 eq. | rt. | 75 | 83 |
| 12 | 4 | 4   | toluene<br>(5 M)           | 2 eq. | rt. | 70 | 85 |
| 13 | 4 | 3.2 | toluene<br>(5 M)           | 2 eq. | rt. | 70 | 90 |
| 14 | 4 | 2   | toluene<br>(5 M)           | 2 eq. | rt. | 70 | 85 |

**Table S6. Effect of the solvents on palladium-catalyzed asymmetric allylic amination of 1,3-diphenyl-2-propenyl acetate with aniline.**

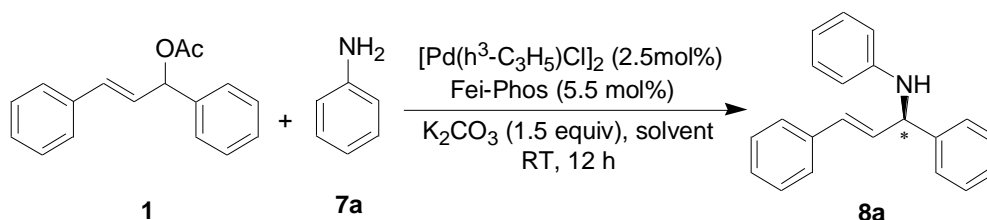

| Entry | solvent                | conv.(%) | <i>Ee</i> (%) |
|-------|------------------------|----------|---------------|
| 1     | Toluene                | >99      | 0             |
| 2     | DCM                    | >99      | 23            |
| 3     | THF                    | >99      | 68            |
| 4     | DMF                    | >99      | 77            |
| 5     | NMP                    | >99      | 70            |
| 6     | DMSO                   | >99      | 51            |
| 7     | $\text{CH}_3\text{CN}$ | >99      | 63            |
| 8     | DMA                    | >99      | 80            |

Unless otherwise noted, all the reactions were performed with 0.5 mmol of (E)-1,3-diphenyl-2-propenyl acetate and 0.75 mmol of aniline in 2 mL of the specified solvent for 24 h, in the presence of 0.75 mmol of the specified base, using 0.0125 mmol of [Pd] as the catalyst and 0.0125 mmol of Fei-Phos as chiral ligand. The conversion rate of product is determined by GC on an achiral stationary phase. The *ee* value (*ee* %) of product was determined by chiral HPLC with a Chiracel AD-H column.



**Table S7. Effect of the bases on palladium-catalyzed asymmetric allylic amination of 1,3-diphenyl-2-propenyl acetate with aniline.**

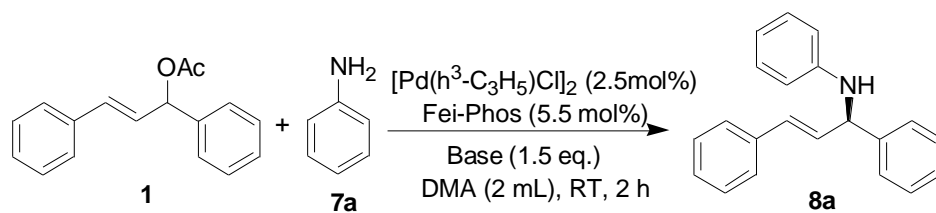

| Entry             | base                            | conv.(%) | <i>Ee</i> (%) |
|-------------------|---------------------------------|----------|---------------|
| 1                 | -                               | 84       | 73            |
| 2                 | BSA                             | 86       | 57            |
| 3                 | DBU                             | trace    | -             |
| 5                 | CsF                             | 93       | 81            |
| 6                 | TMEDA                           | 85       | 80            |
| 7                 | Cs <sub>2</sub> CO <sub>3</sub> | trace    | -             |
| 8                 | K <sub>2</sub> CO <sub>3</sub>  | >99      | 80            |
| 9                 | LiOAc                           | 87       | 75            |
| 10                | NaOAc                           | >99      | 67            |
| 11                | KOAc                            | >99      | 80            |
| 12                | KH <sub>2</sub> PO <sub>4</sub> | >99      | 70            |
| 13                | K <sub>2</sub> HPO <sub>4</sub> | >99      | 40            |
| 14                | <i>t</i> -BuOK                  | trace    | -             |
| 15                | K <sub>3</sub> PO <sub>4</sub>  | >99      | 83            |
| 16 <sup>[a]</sup> | K <sub>3</sub> PO <sub>4</sub>  | >99      | 80            |
| 17 <sup>[b]</sup> | K <sub>3</sub> PO <sub>4</sub>  | >99      | 81            |

[a] Aniline (3 eq.), K<sub>3</sub>PO<sub>4</sub> (3 eq.). [b] Aniline (1.5 eq.), K<sub>3</sub>PO<sub>4</sub> (3 eq.).

**Table S8. Effect of the dosage of catalyst on palladium-catalyzed asymmetric allylic amination of 1,3-diphenyl-2-propenyl acetate with aniline.**

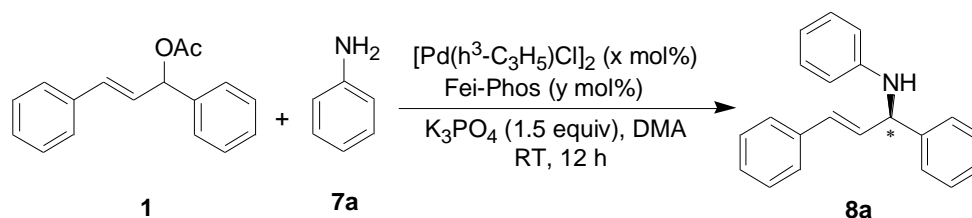

| Entry | x   | y   | conv.(%) | <i>Ee</i> (%) |
|-------|-----|-----|----------|---------------|
| 1     | 2   | 4.4 | >99      | 82            |
| 2     | 2.5 | 5.5 | >99      | 83            |
| 3     | 3   | 6.3 | >99      | 81            |

**Table S9. Effect of the temperature on palladium-catalyzed asymmetric allylic amination of 1,3-diphenyl-2-propenyl acetate with aniline.**

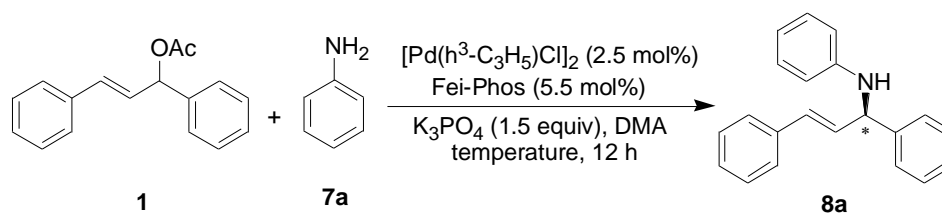

| Entry | T/°C | conv.(%) | <i>Ee</i> (%) |
|-------|------|----------|---------------|
| 1     | 25   | >99      | 83            |
| 2     | -5   | >99      | 81            |
| 3     | -18  | >99      | 82            |

#### 4. NMR Spectra of products: $^1\text{H}$ , $^{13}\text{C}$ , $^{31}\text{P}$ NMR

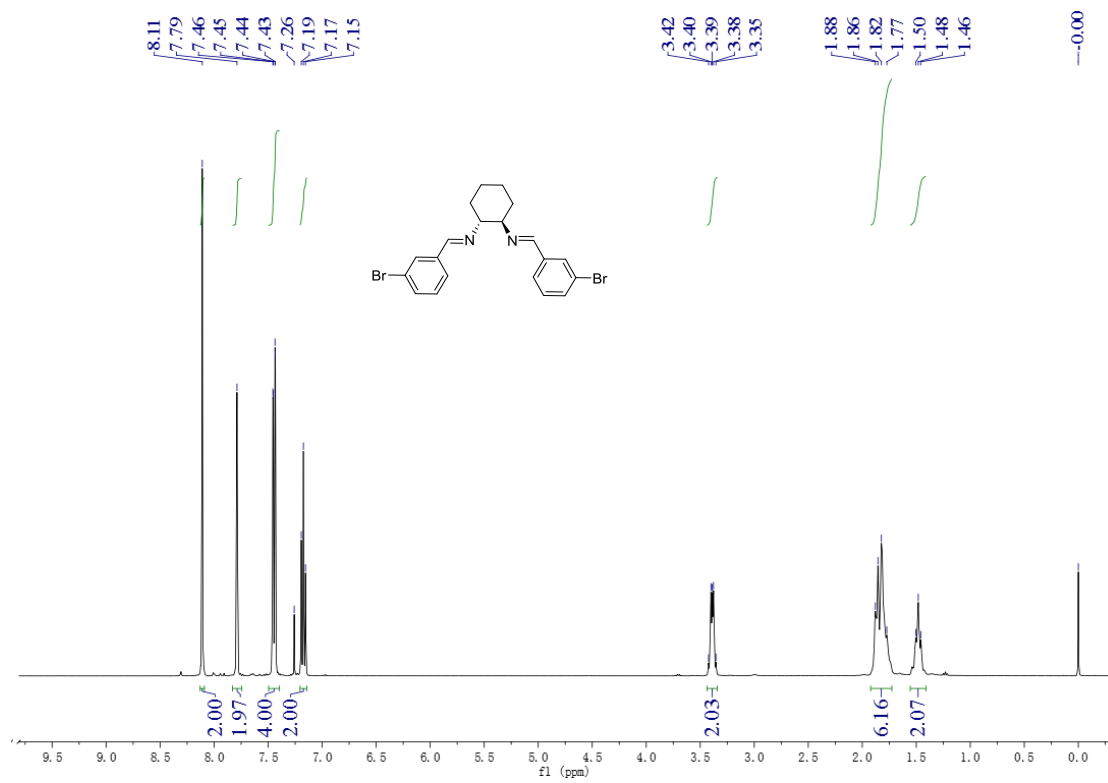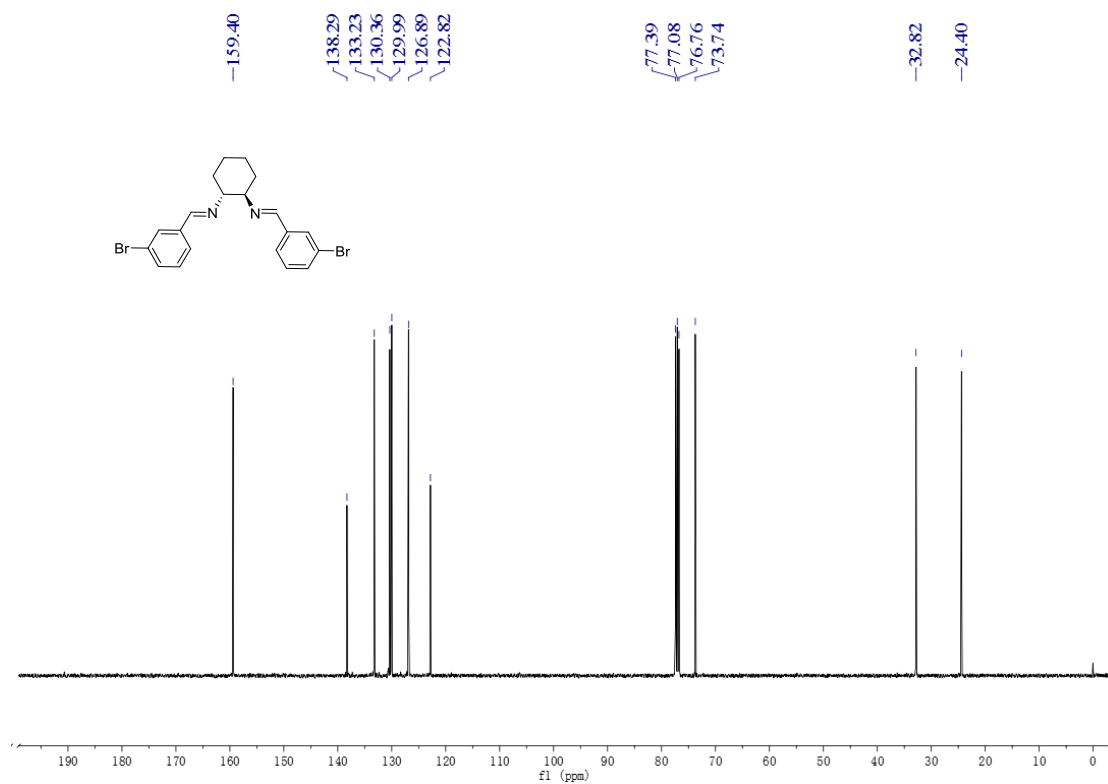

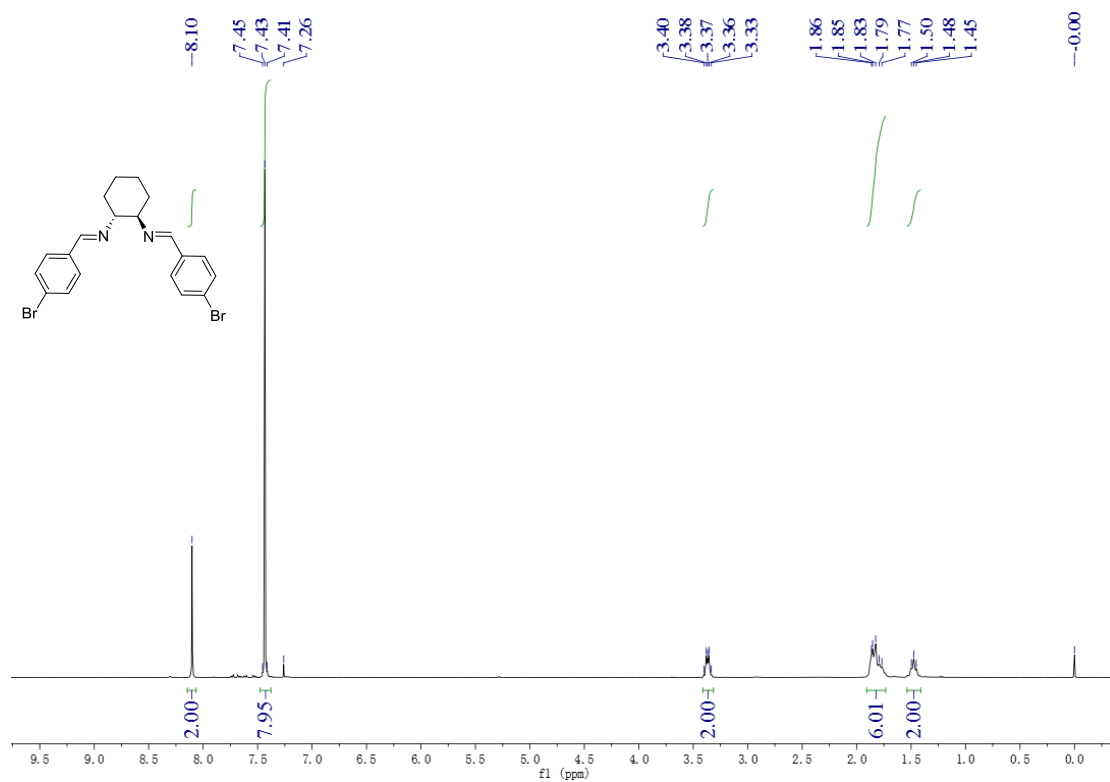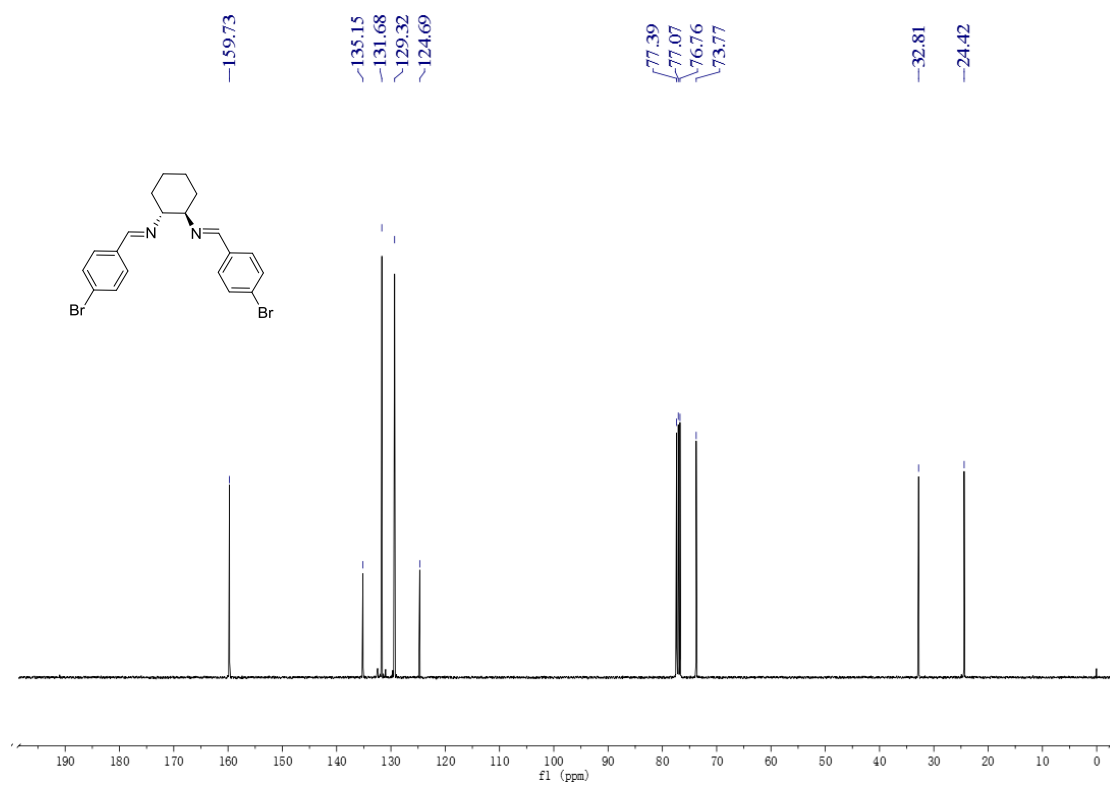

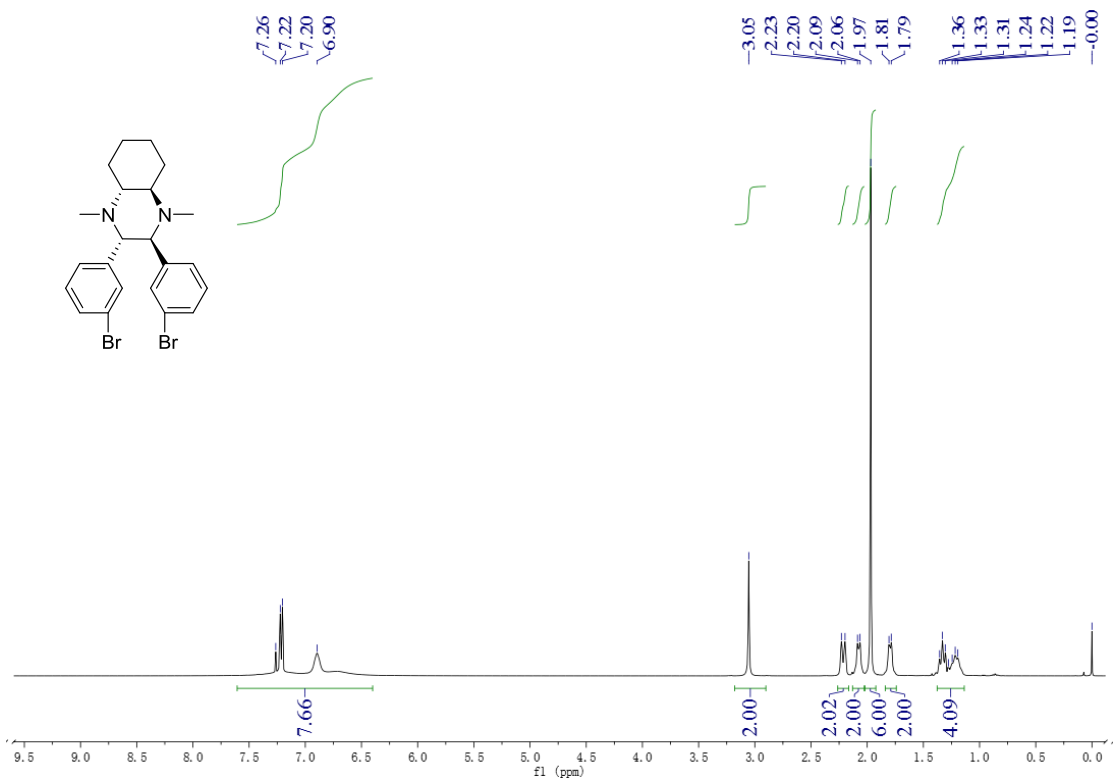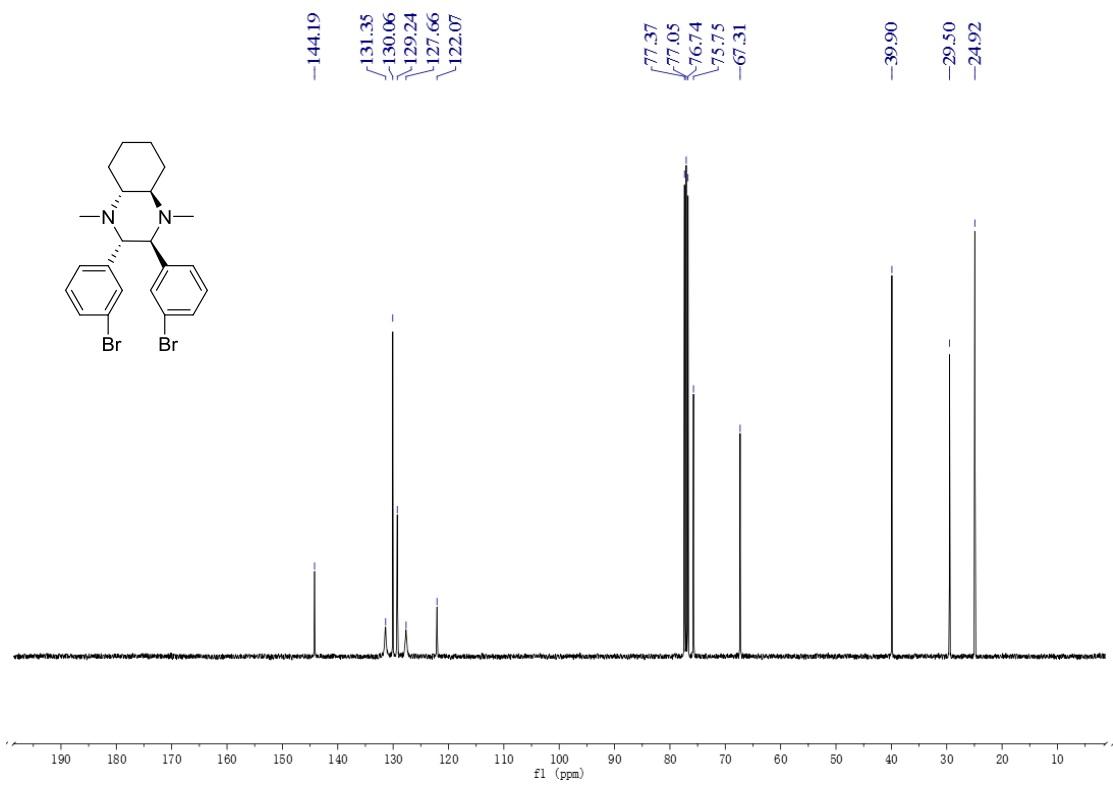

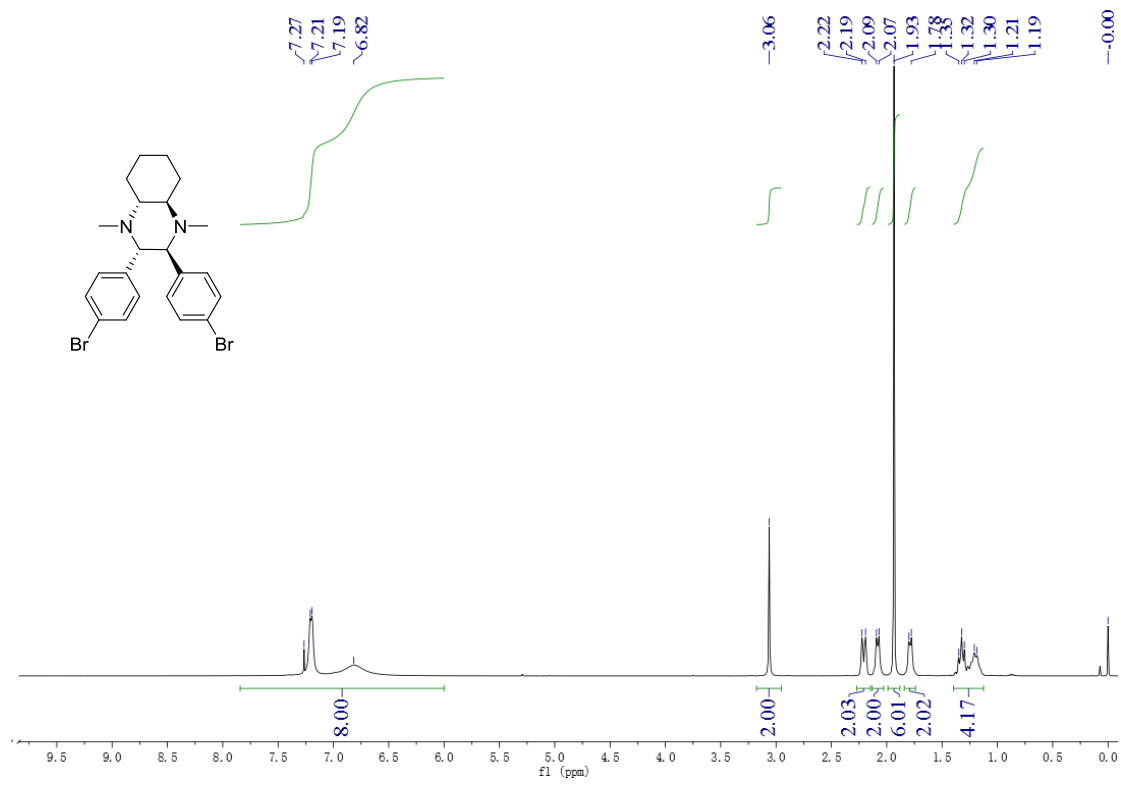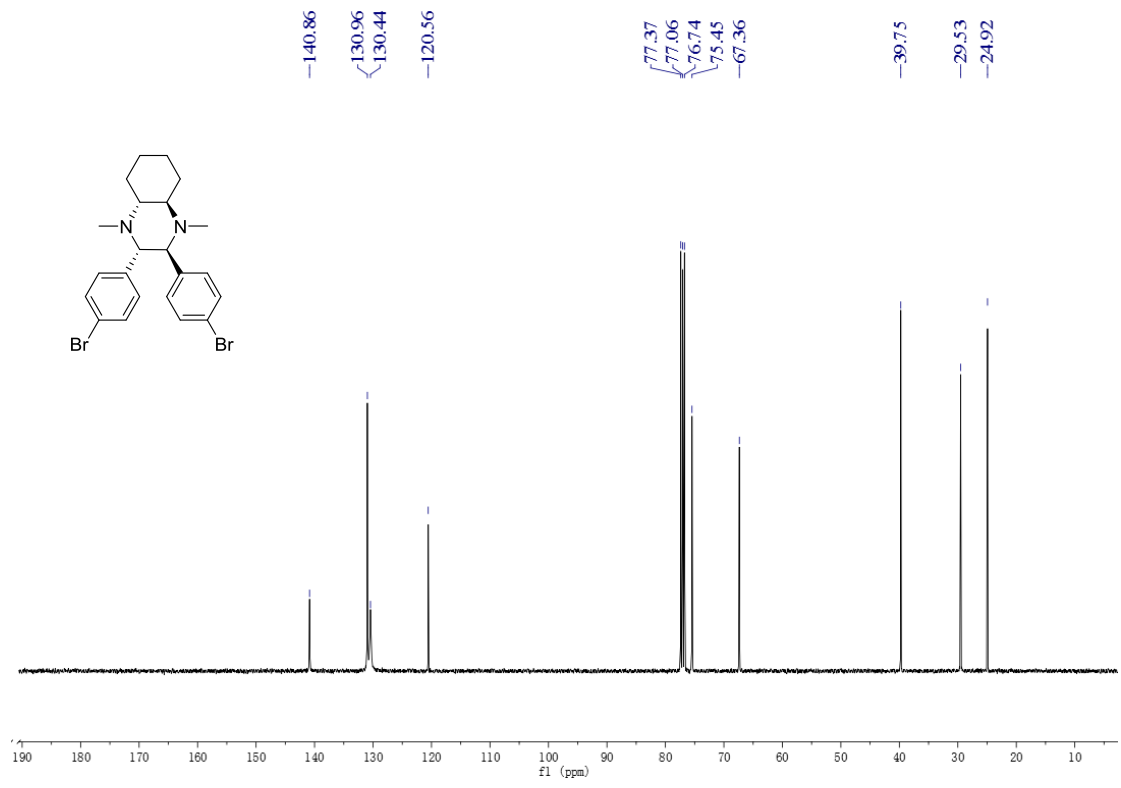

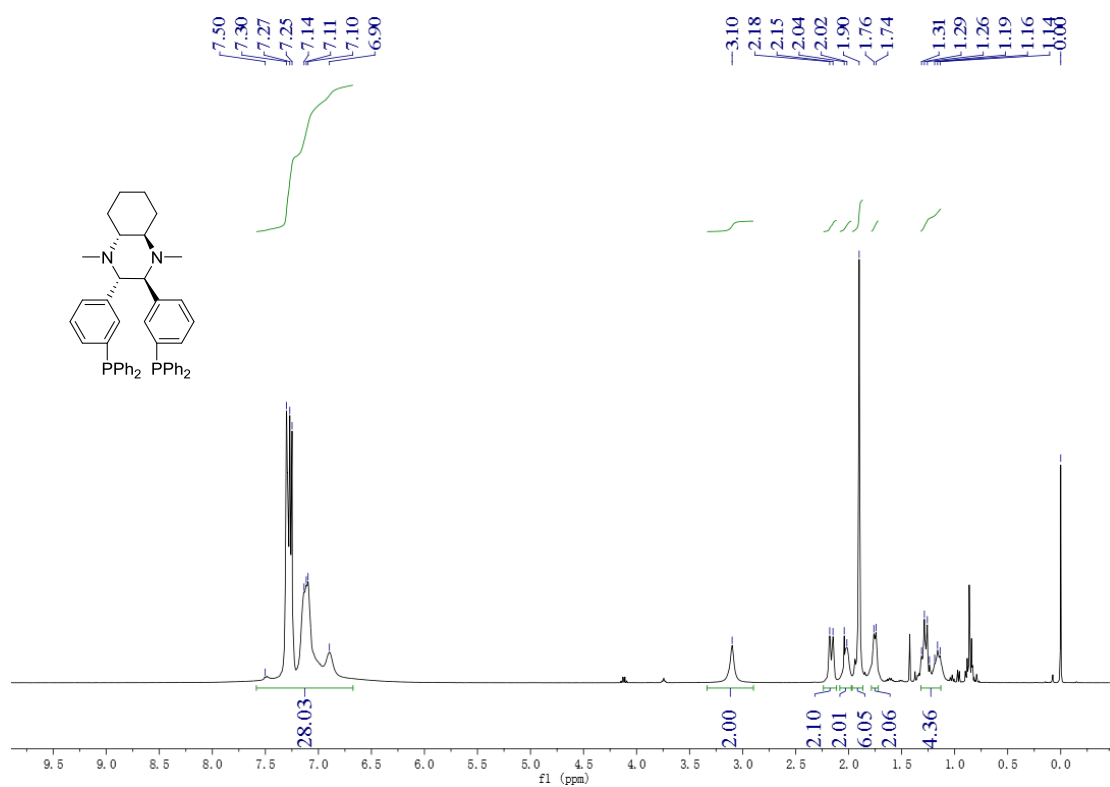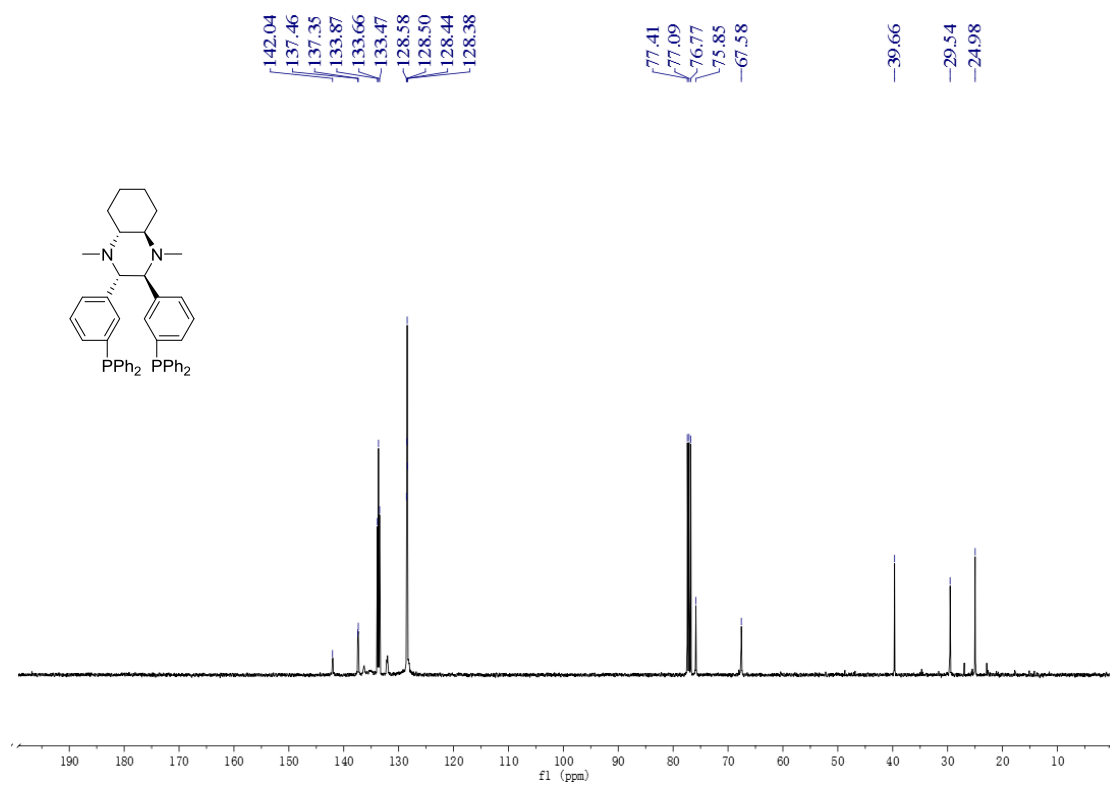

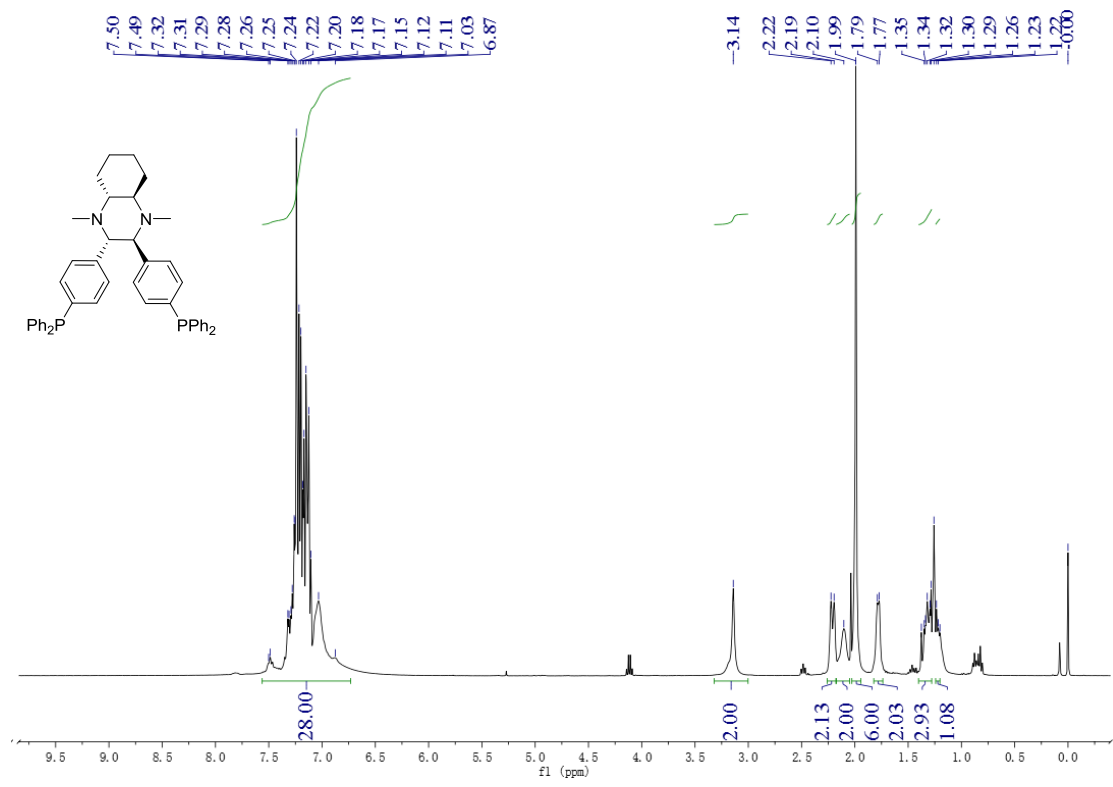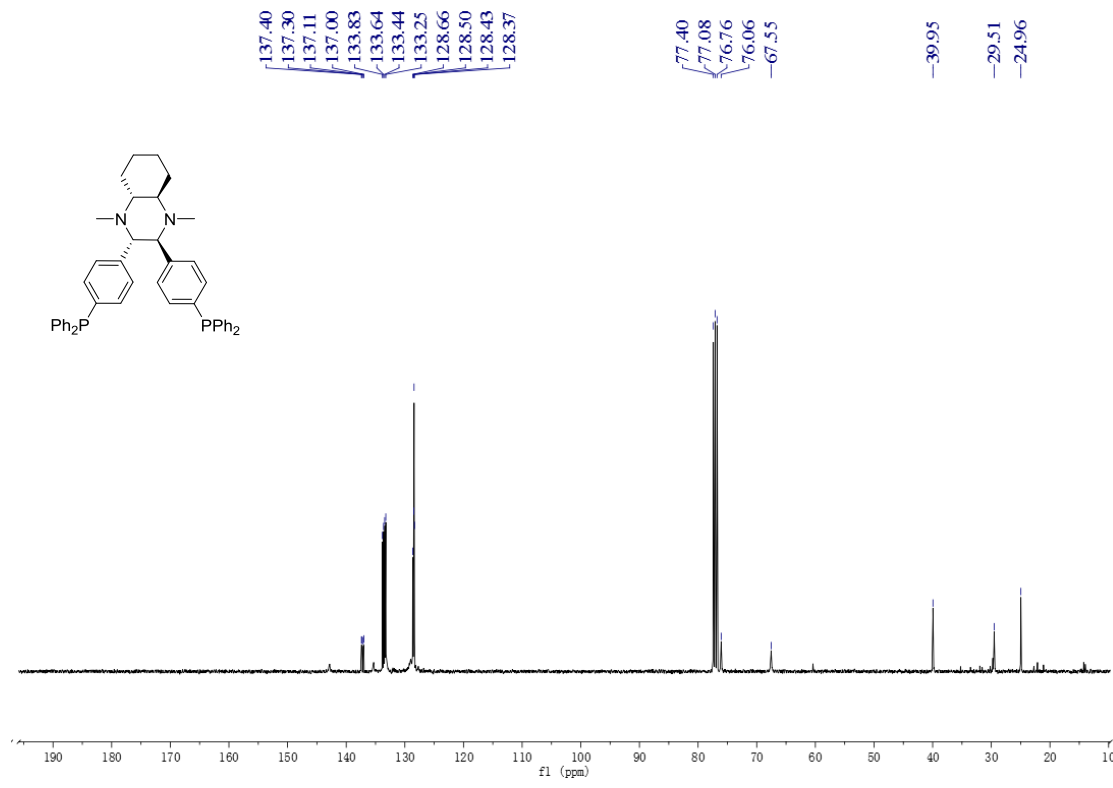



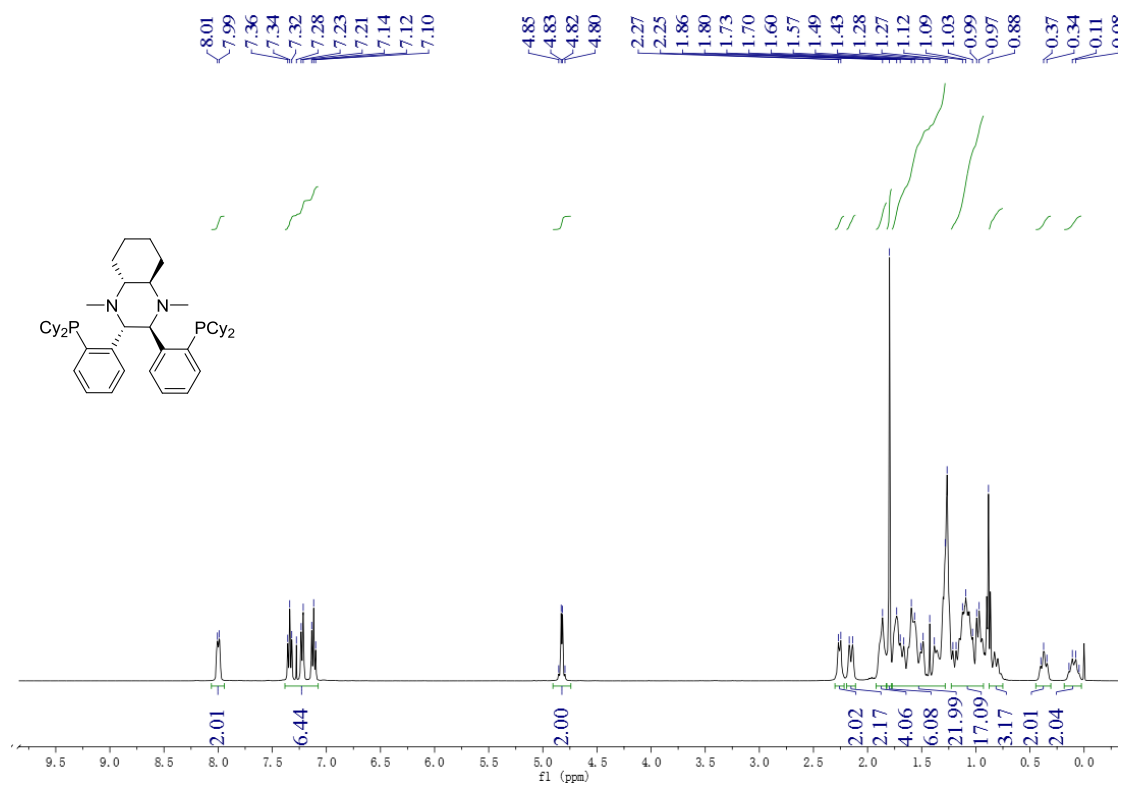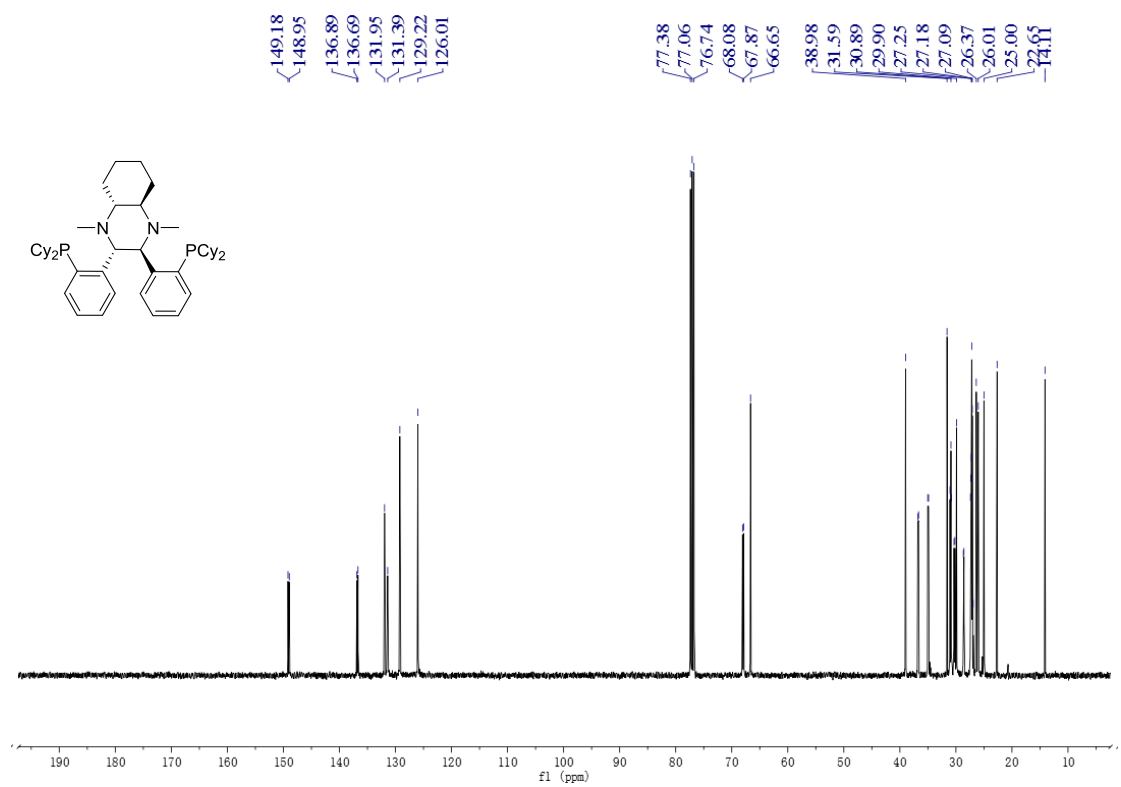

**<sup>31</sup>P NMR of L1a**

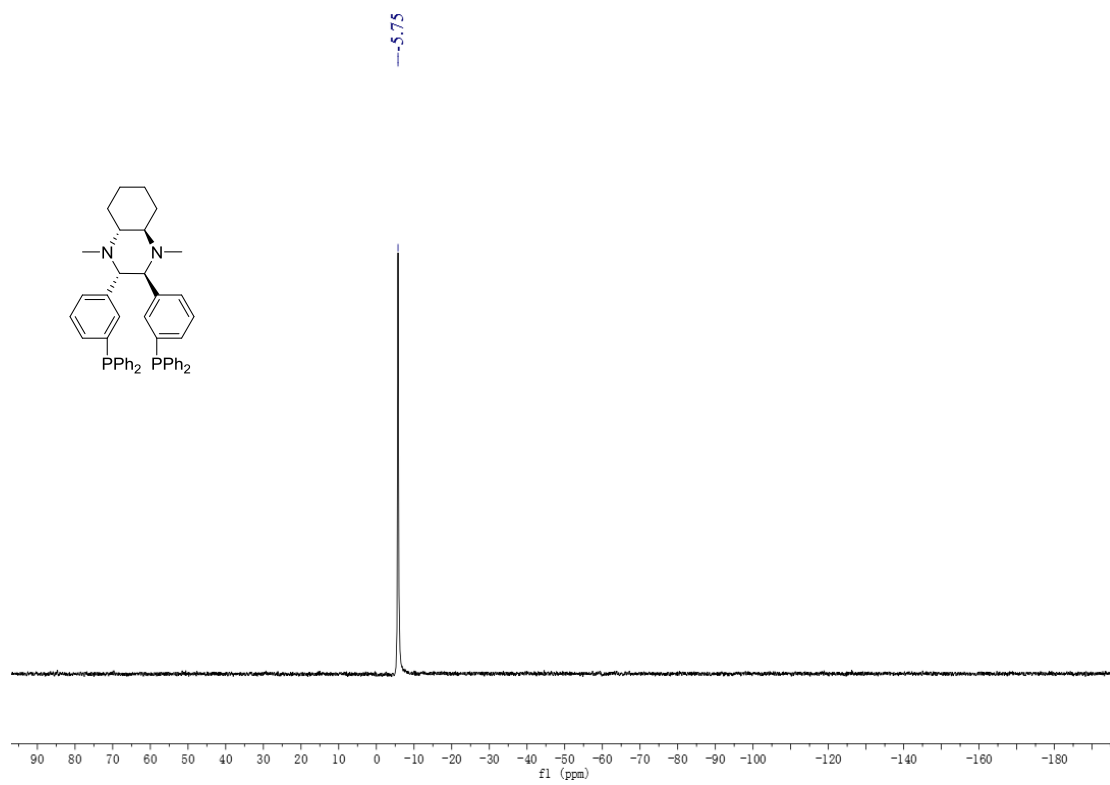

**<sup>31</sup>P NMR of L1b**

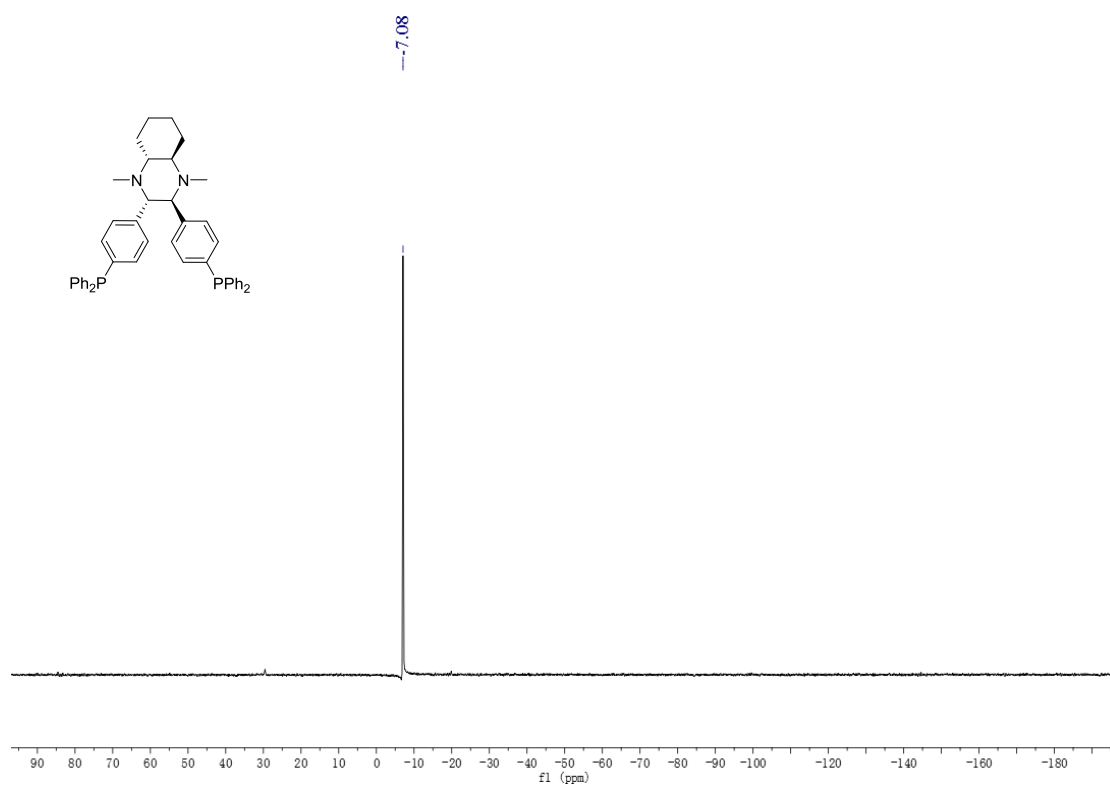

**<sup>31</sup>P NMR of L2**

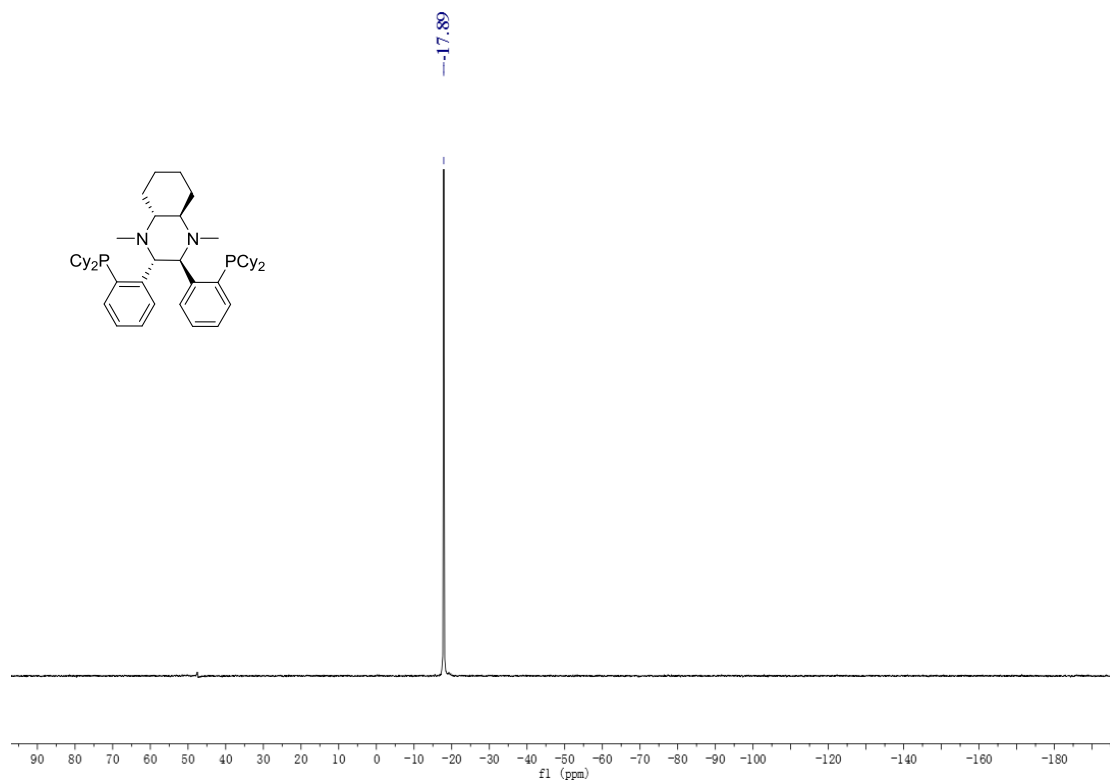

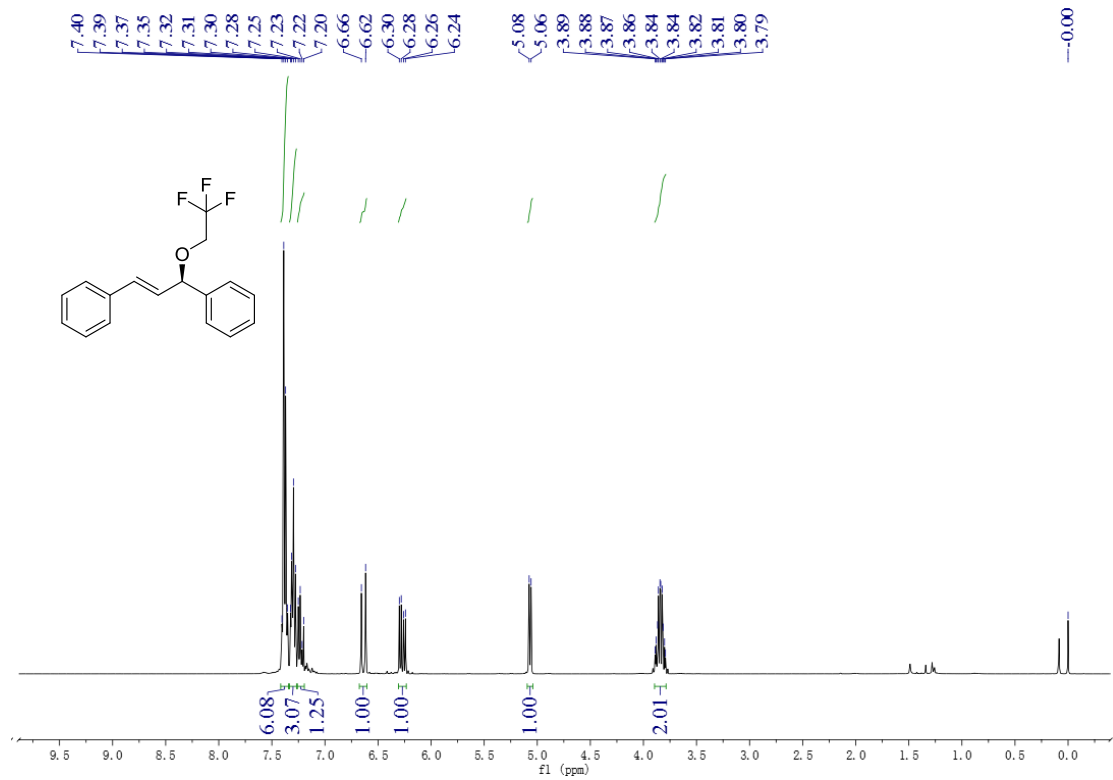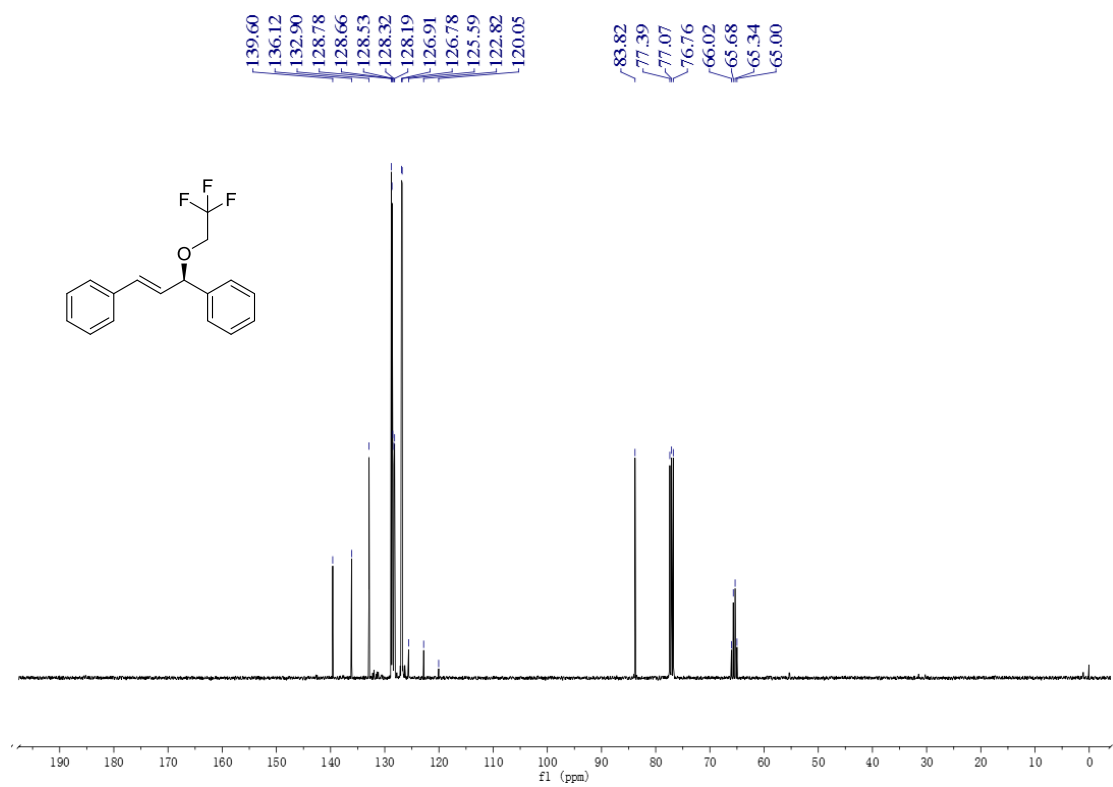

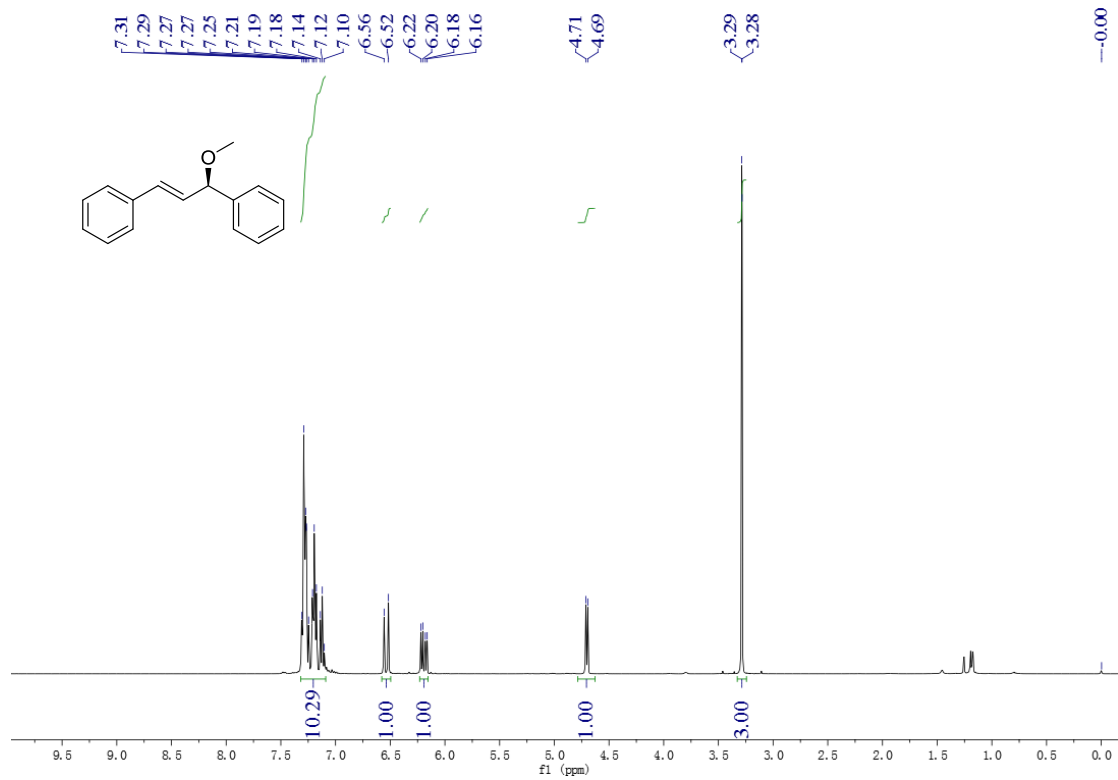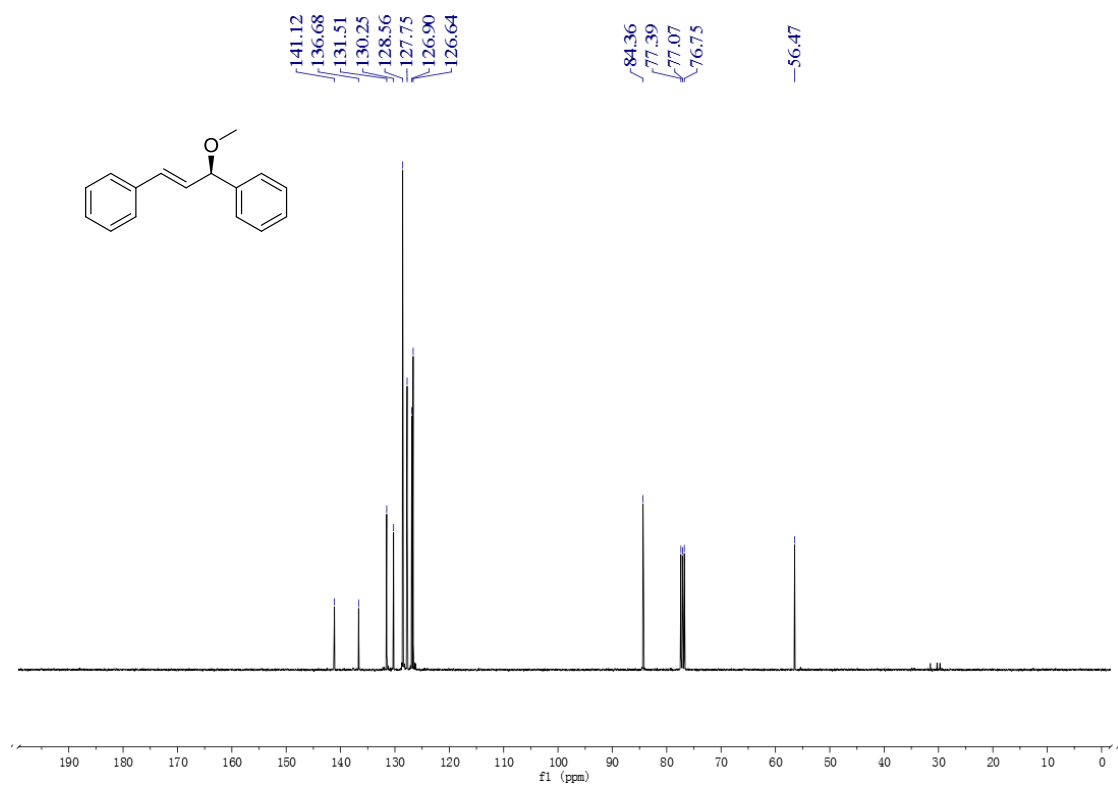

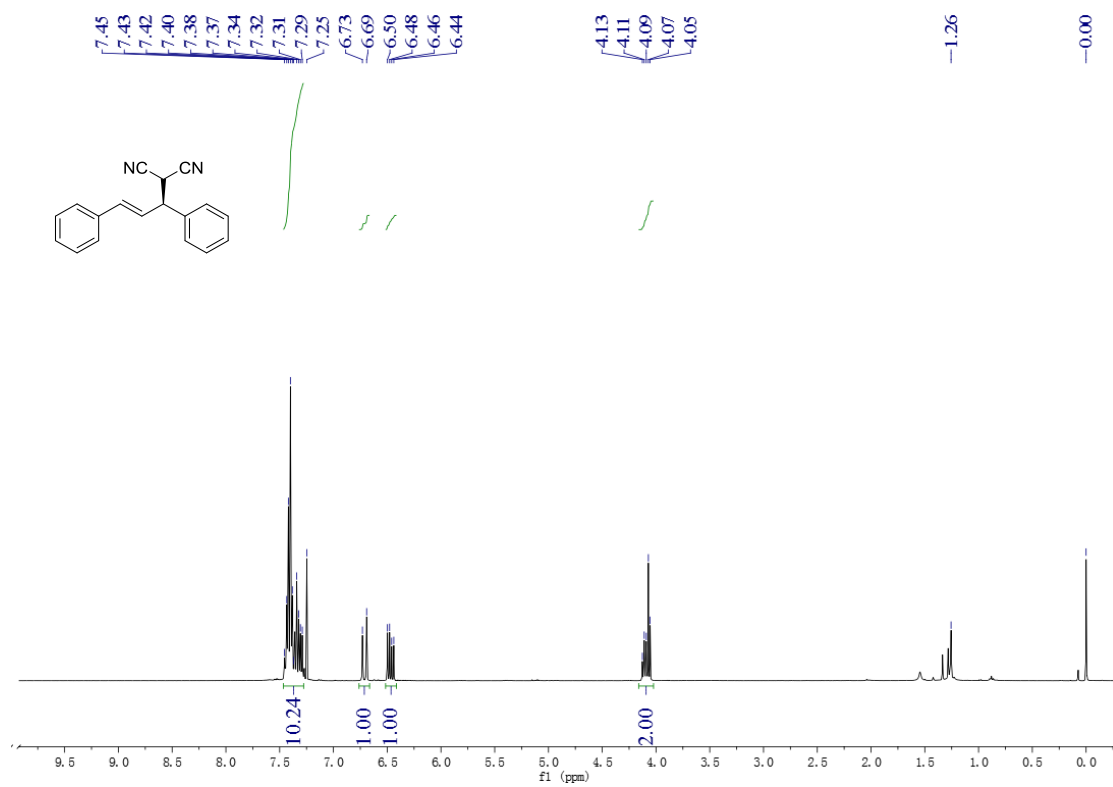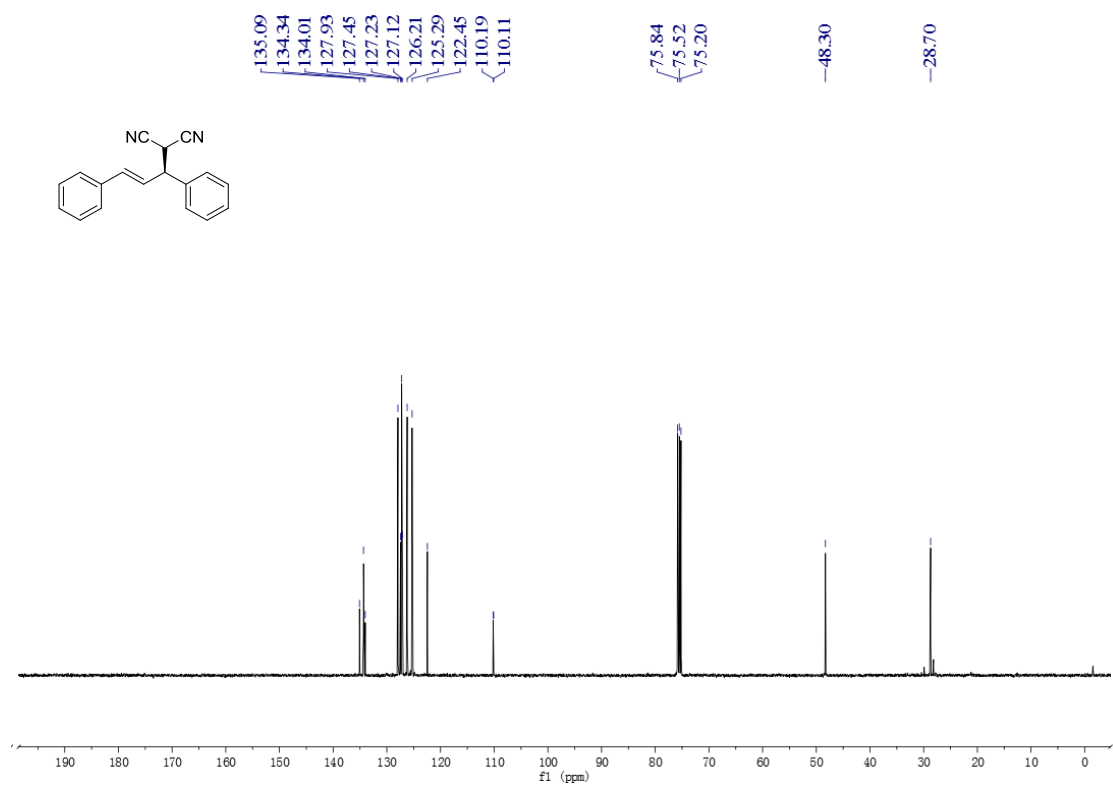

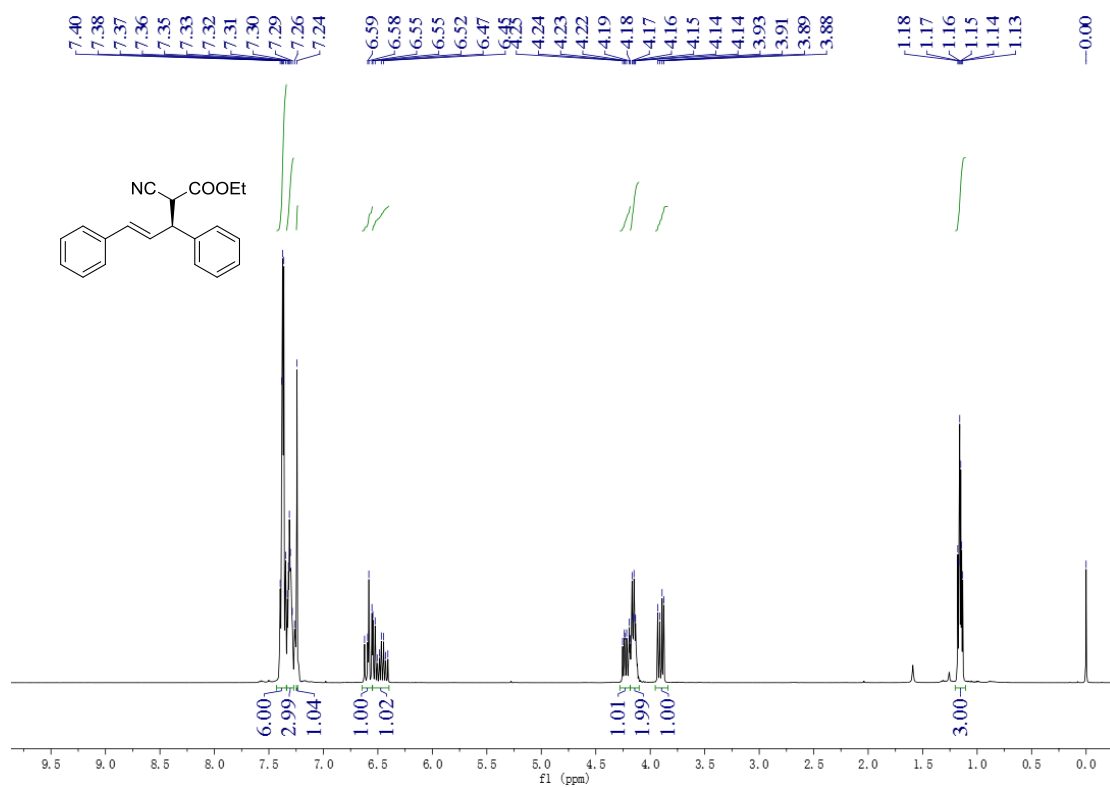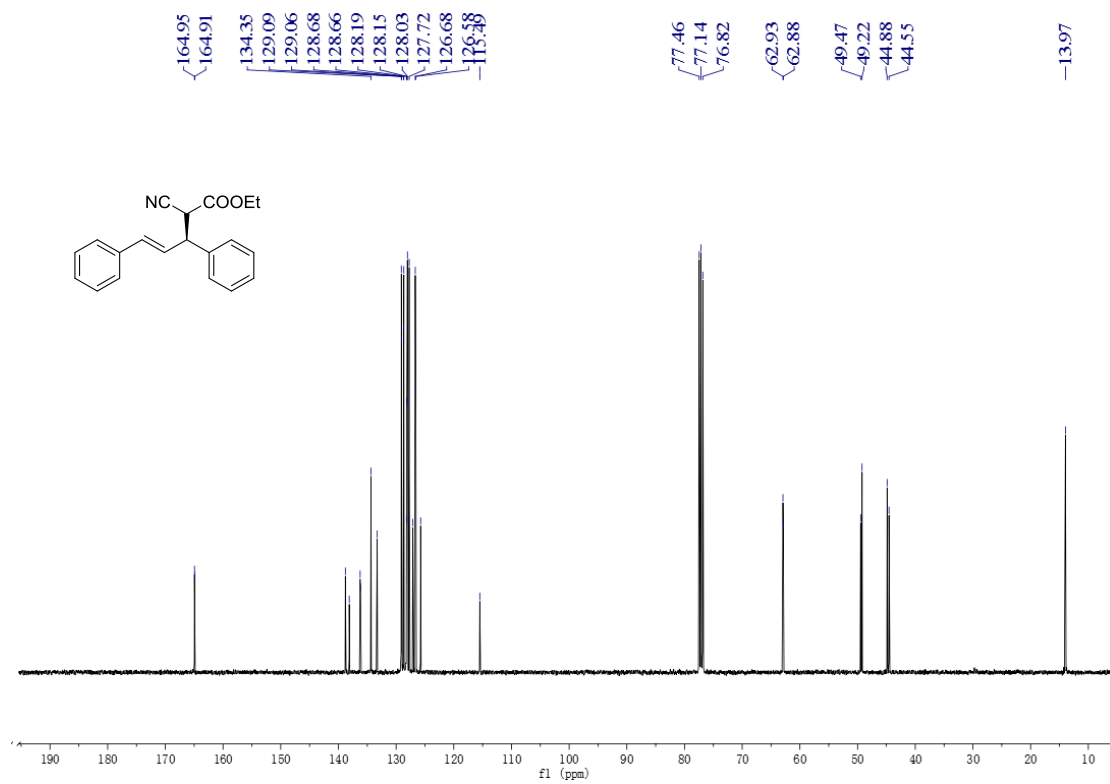

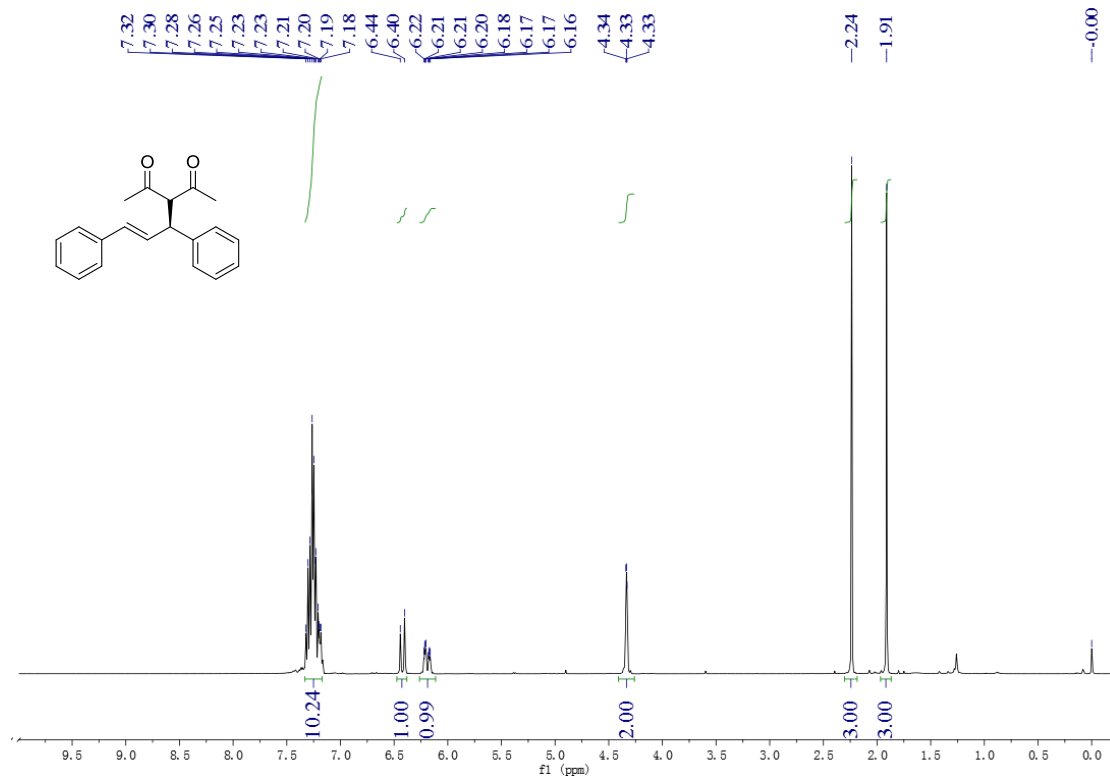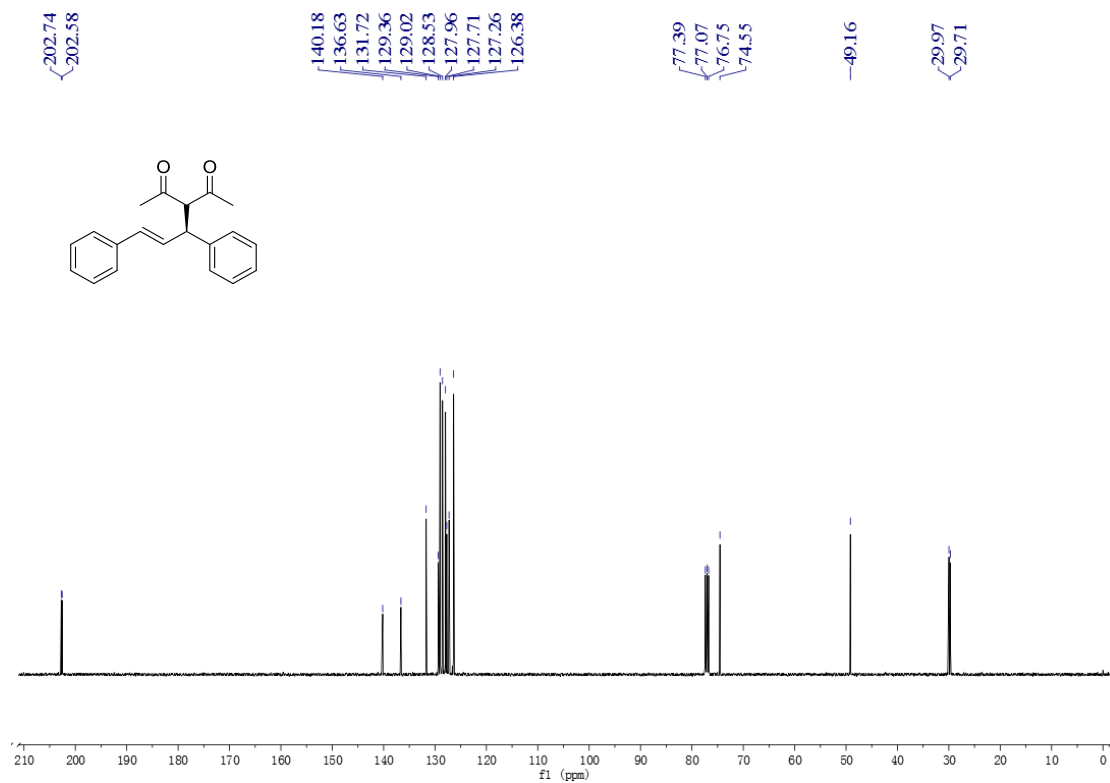



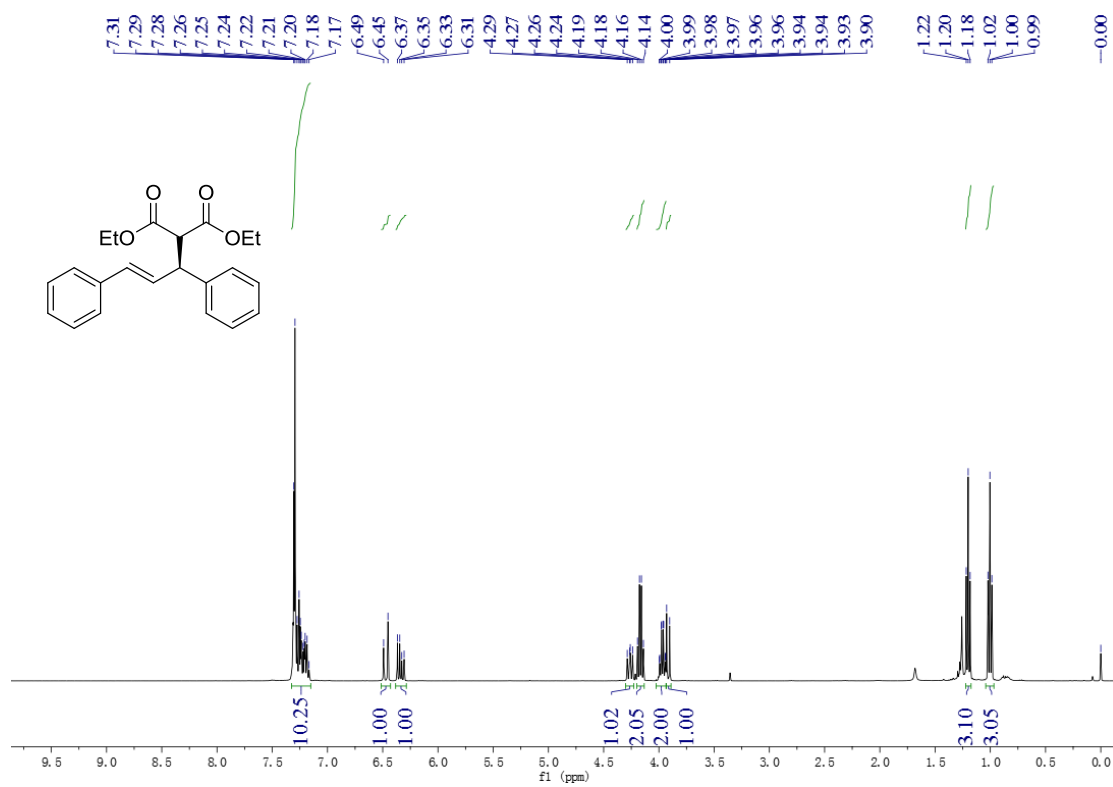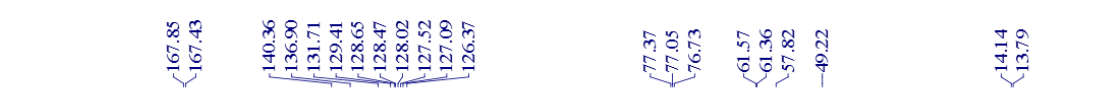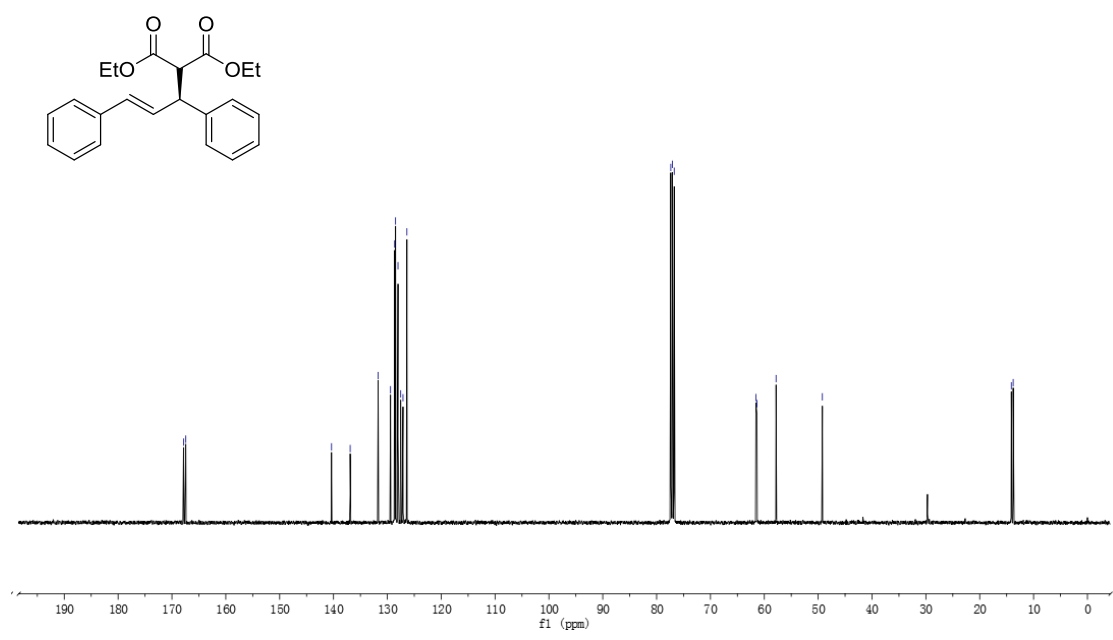

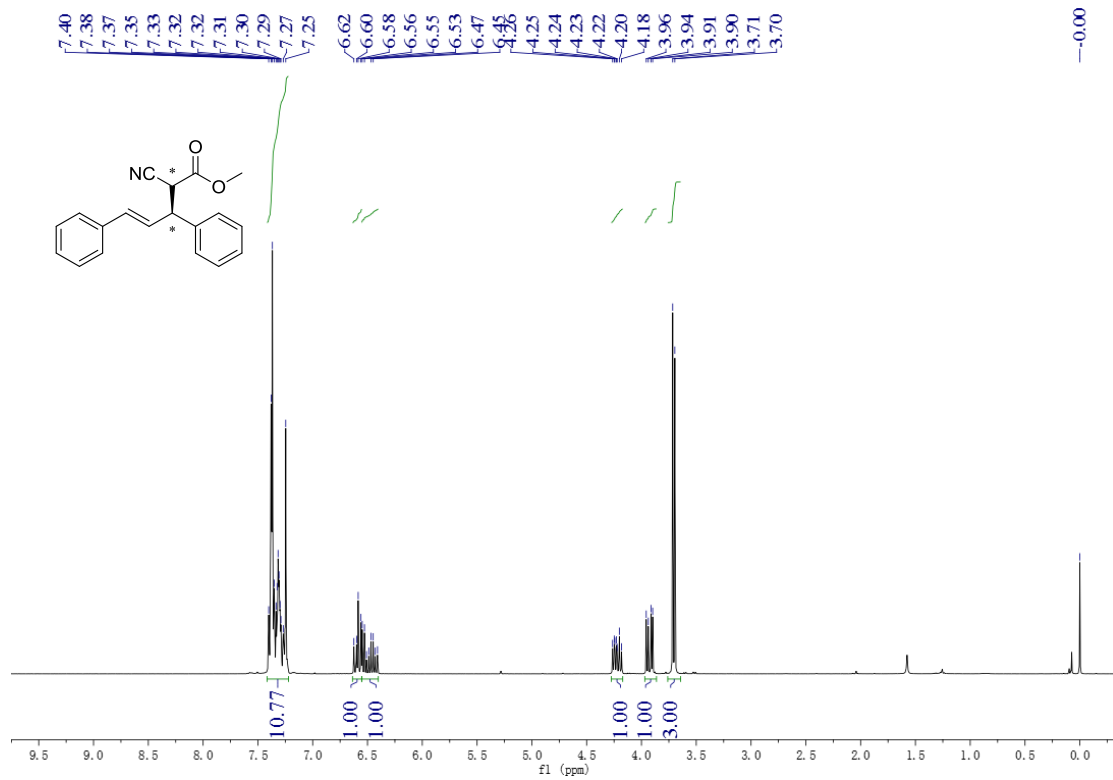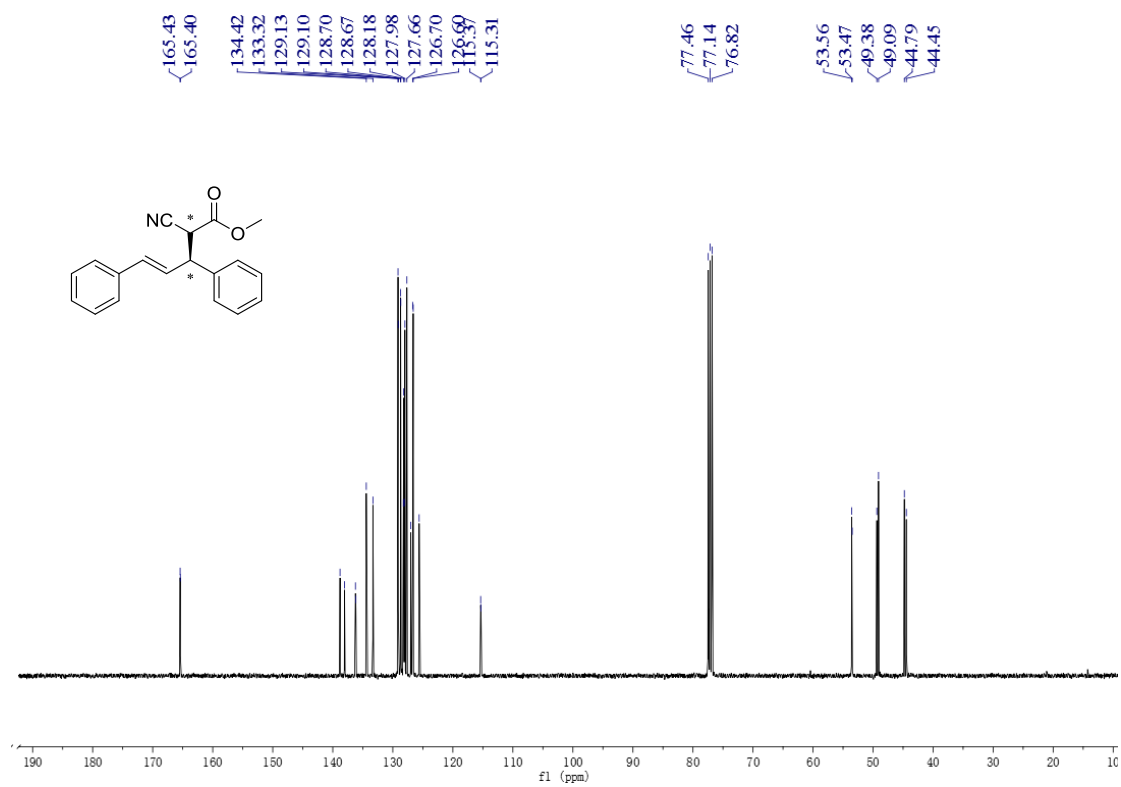

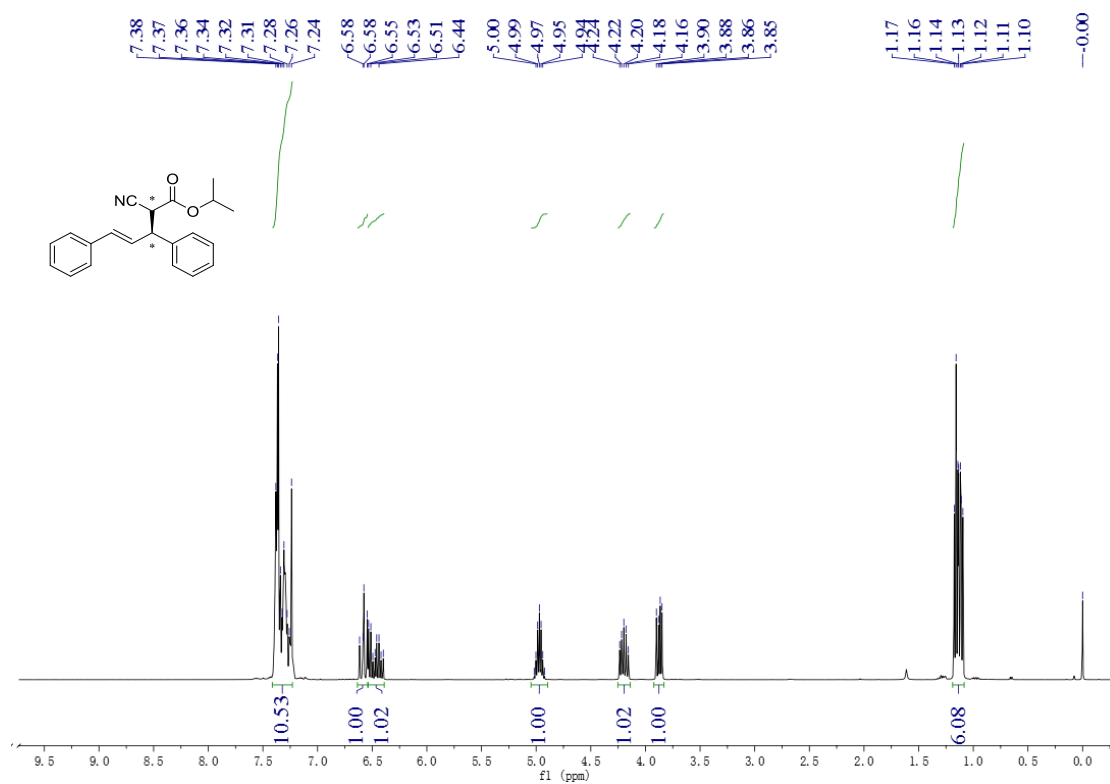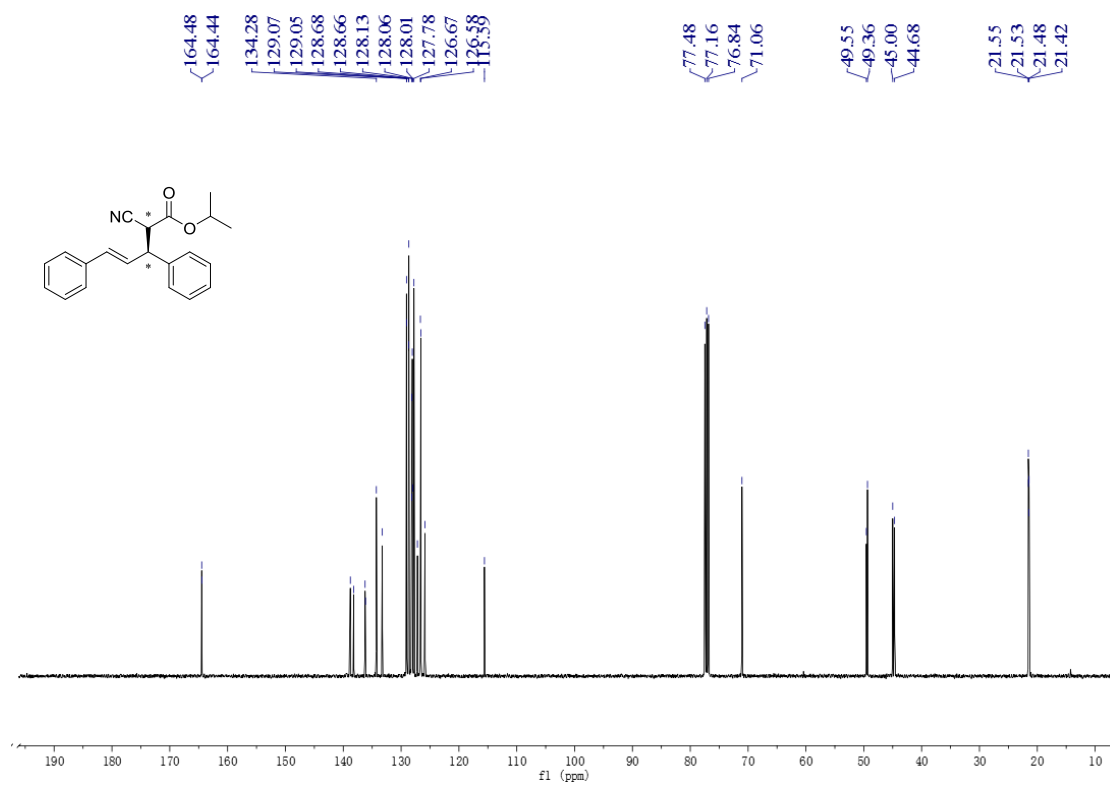

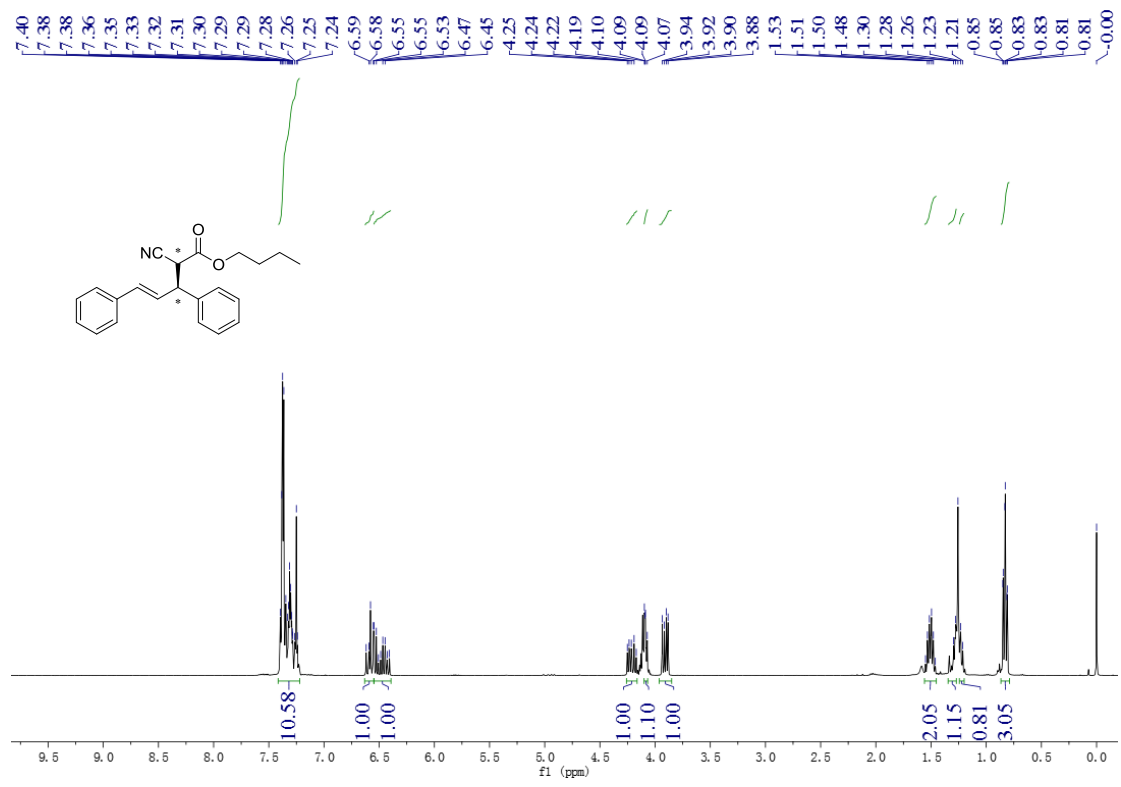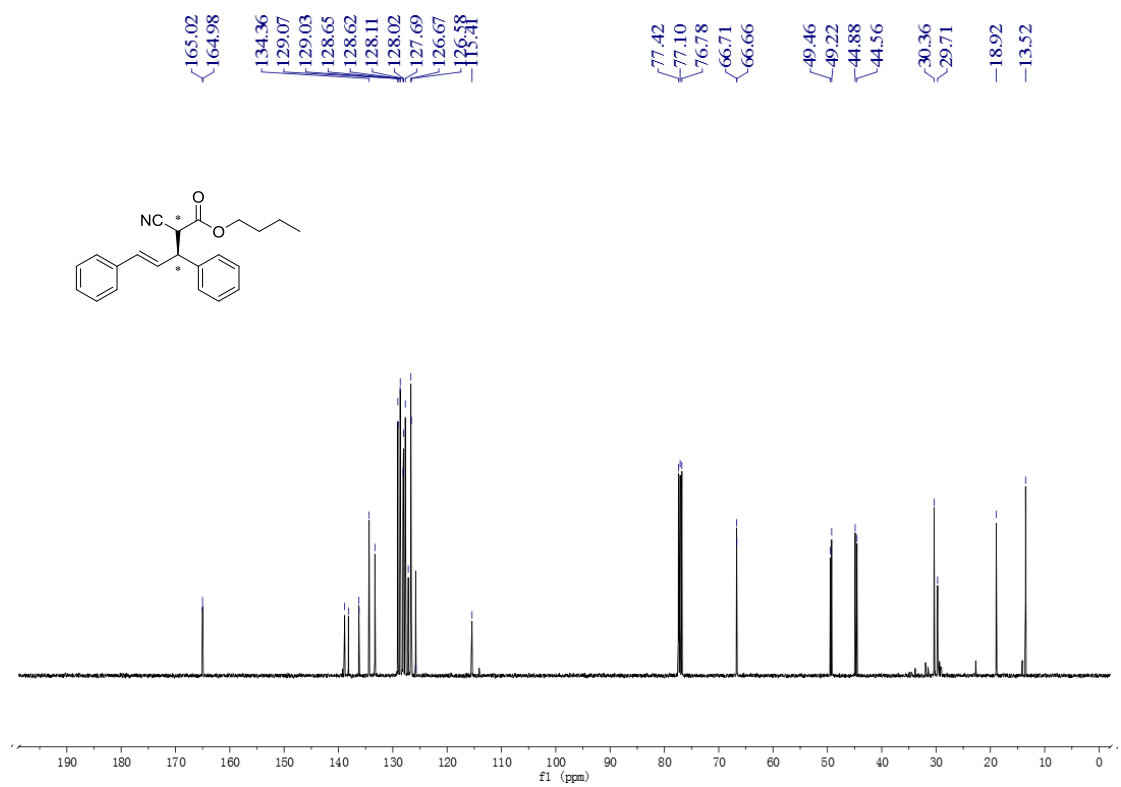

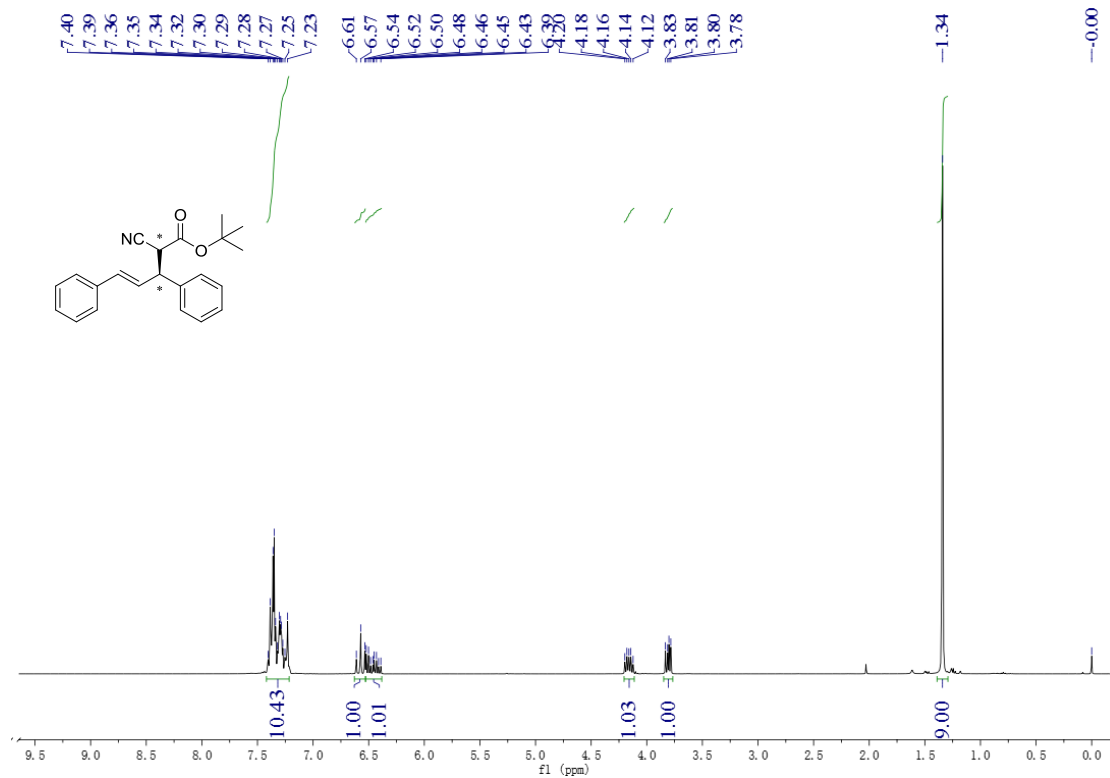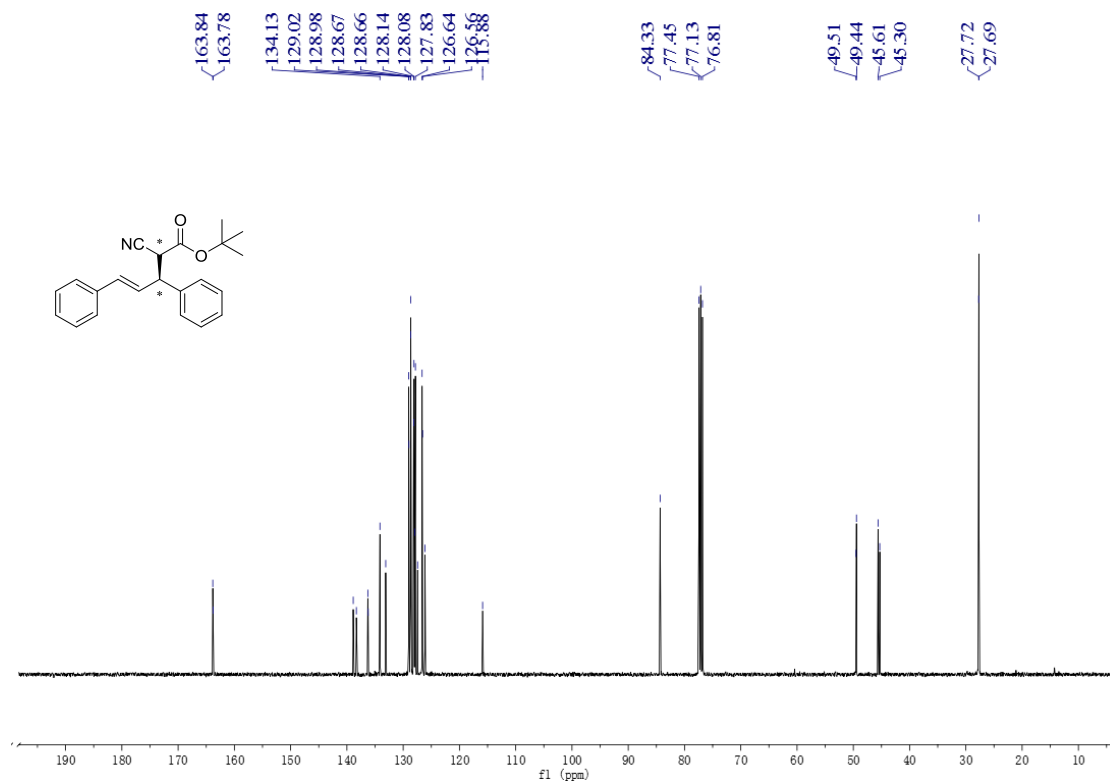

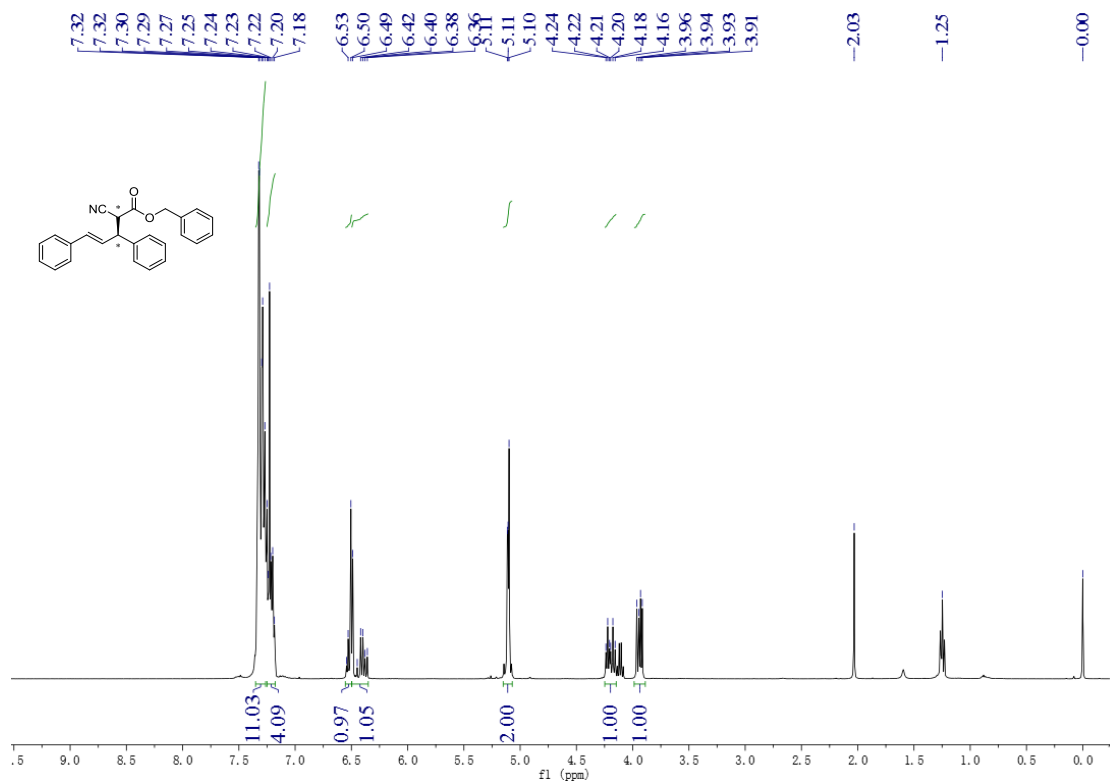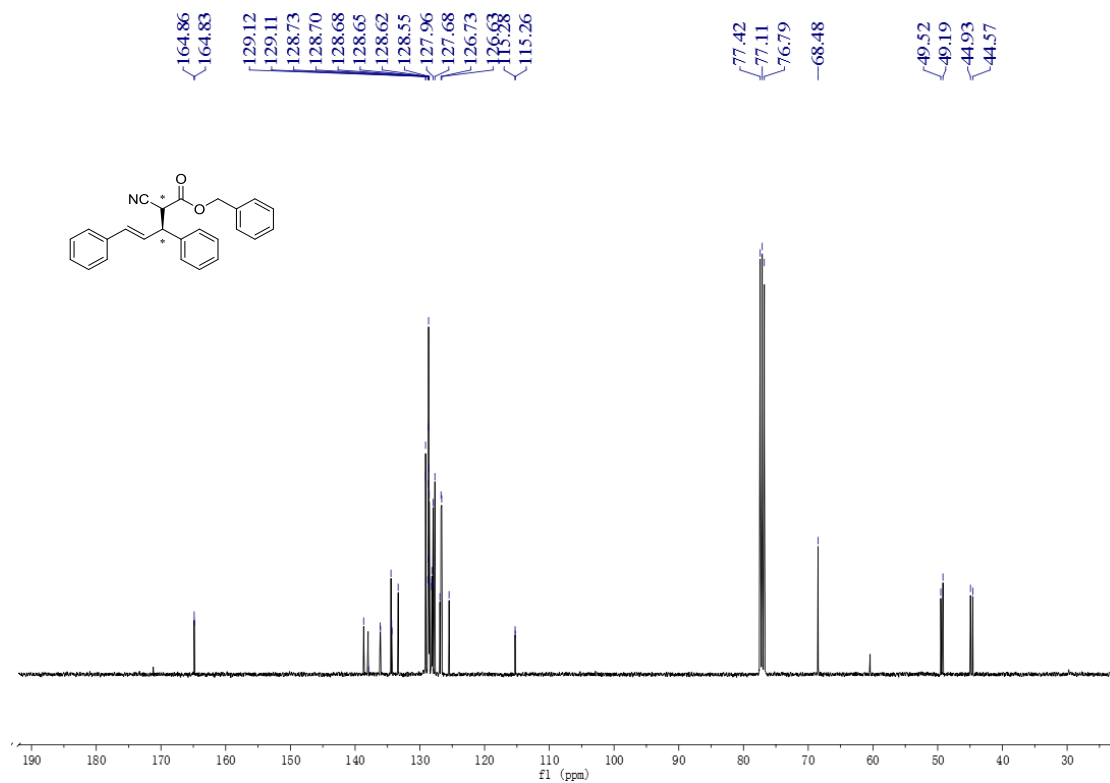

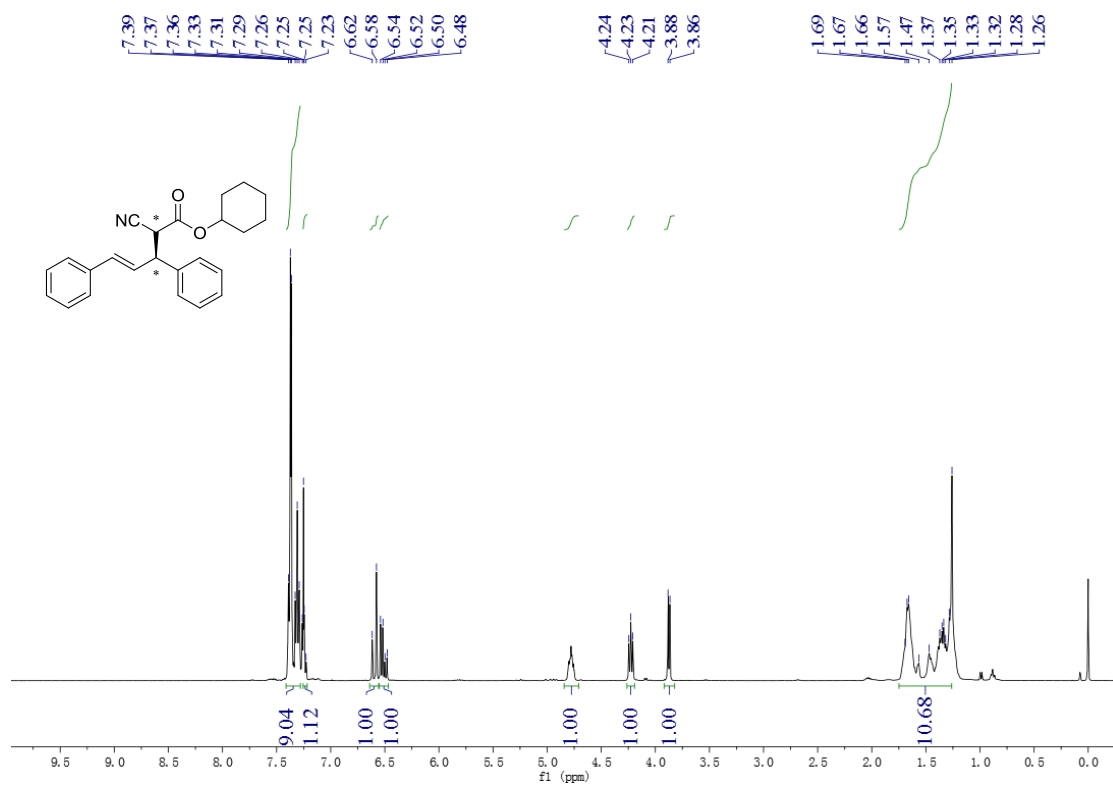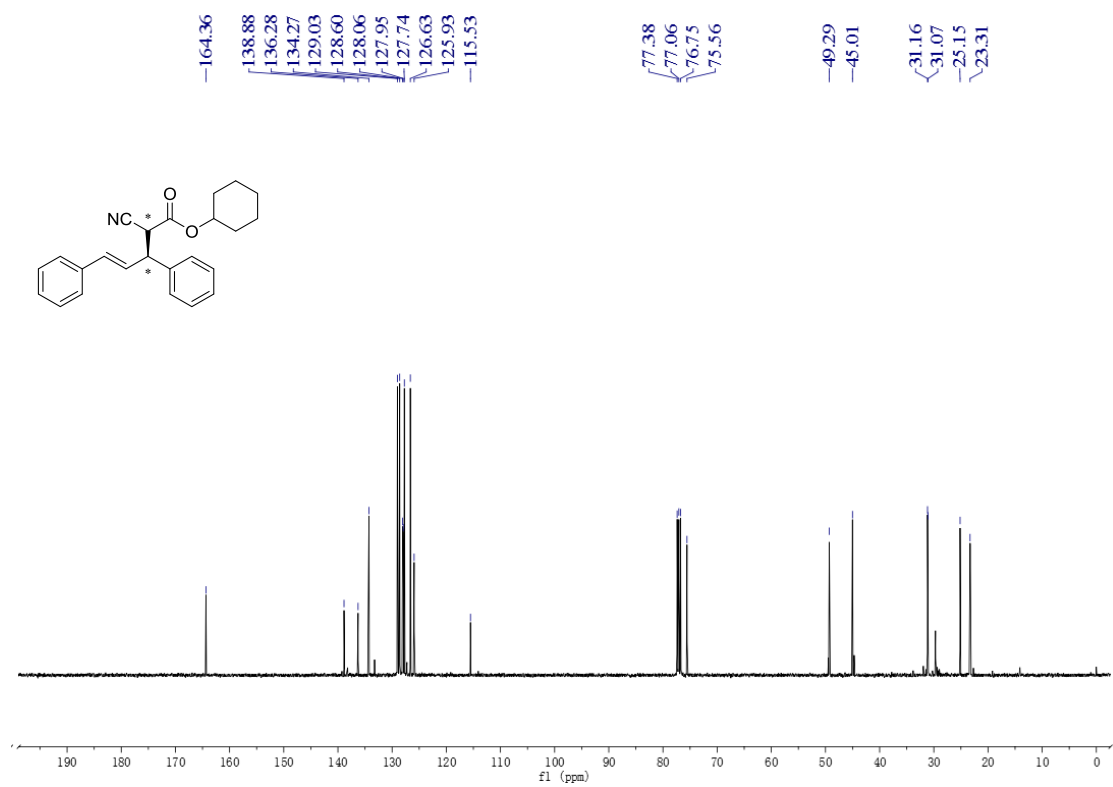

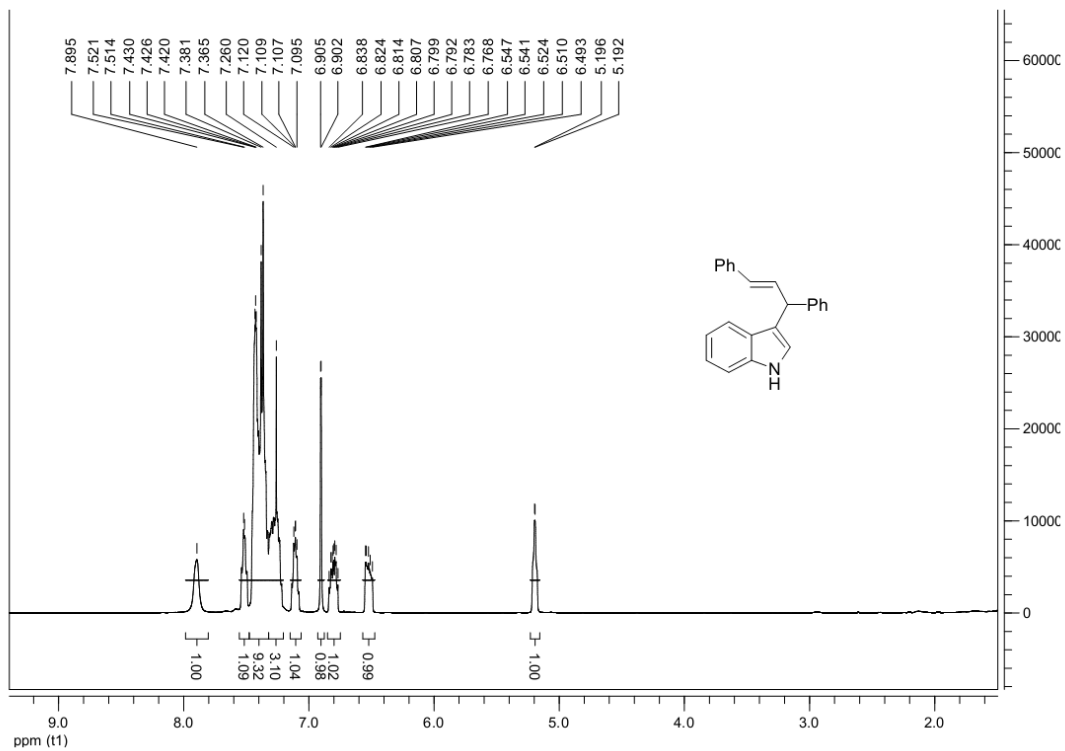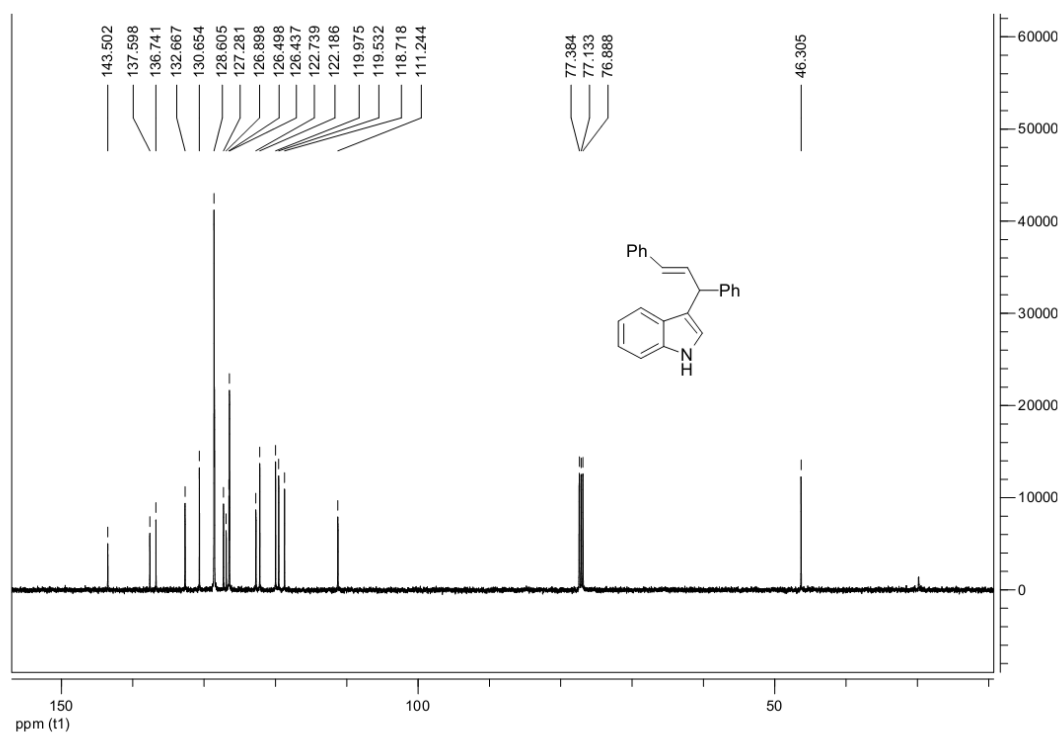



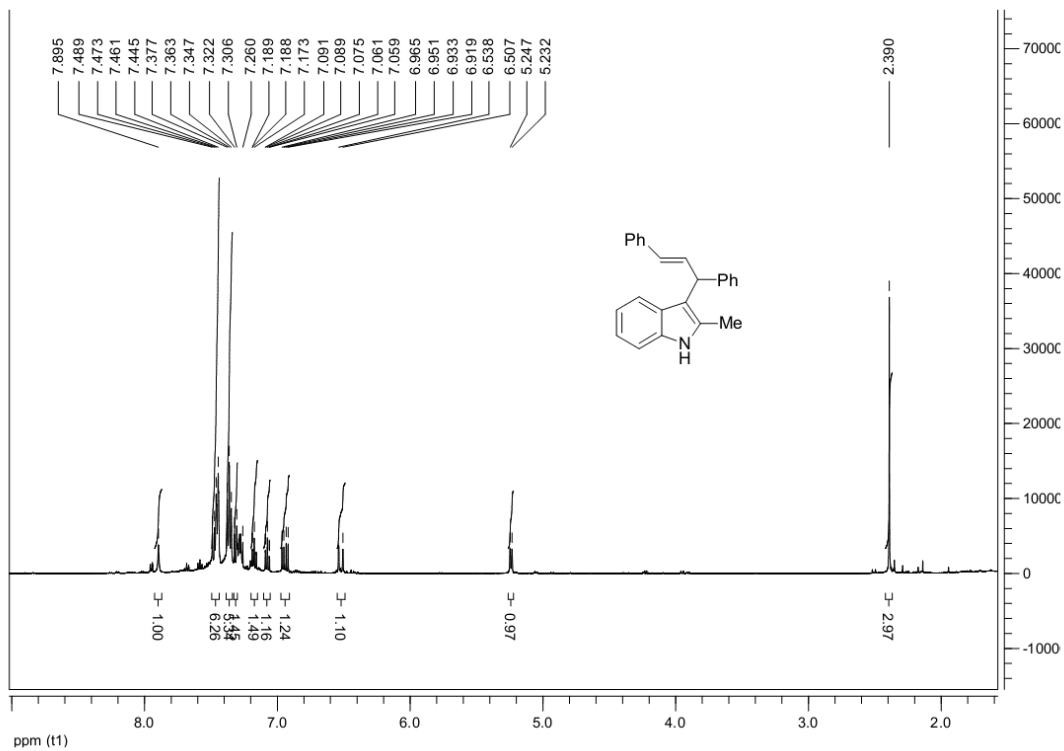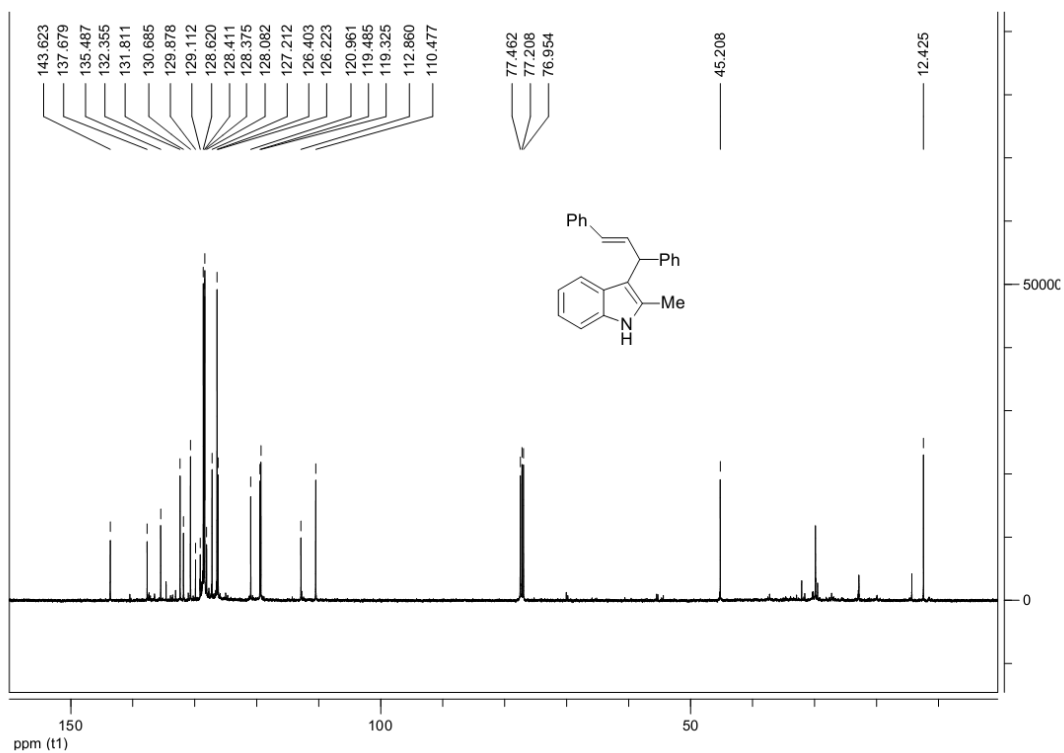

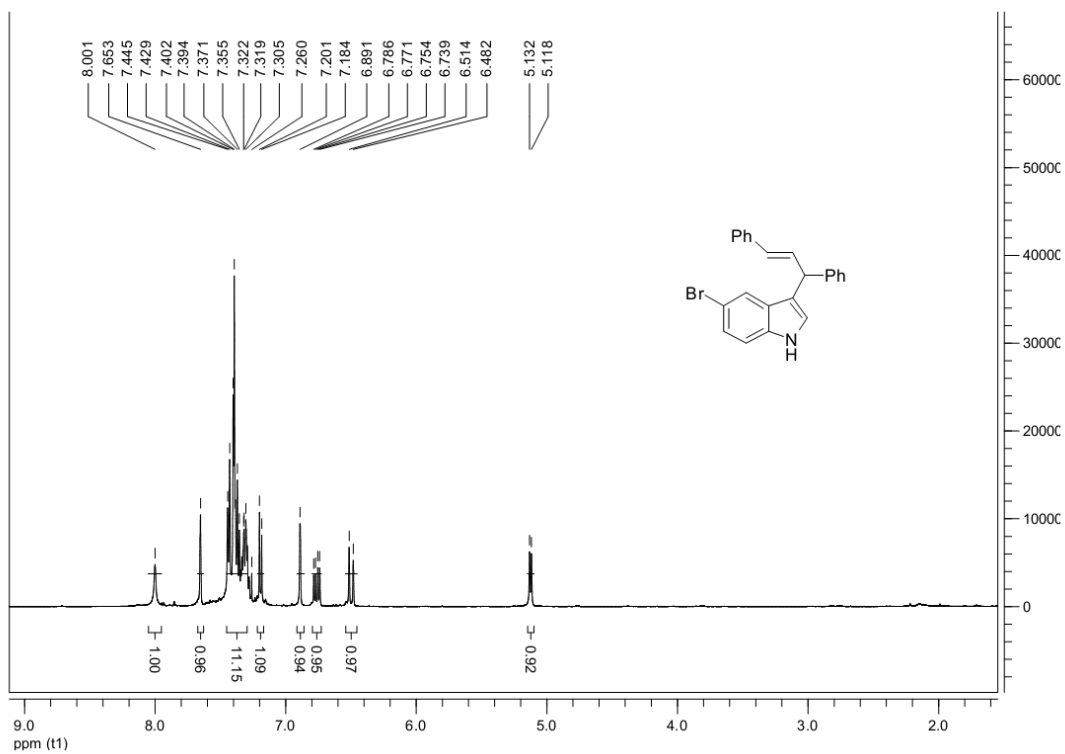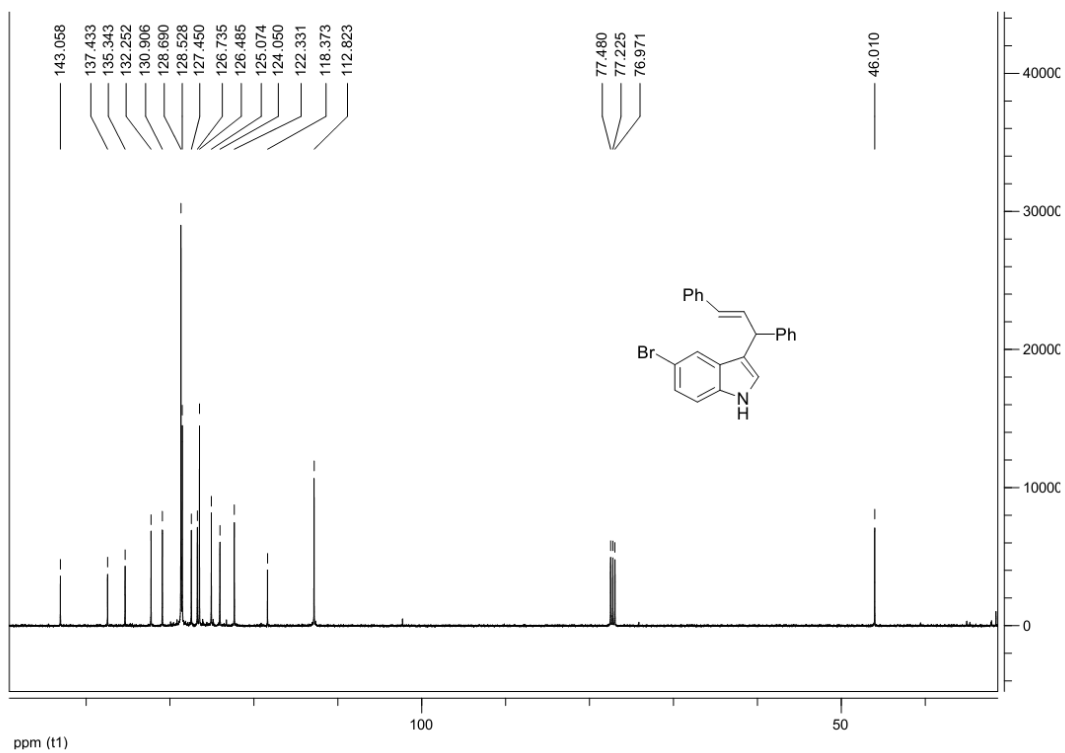

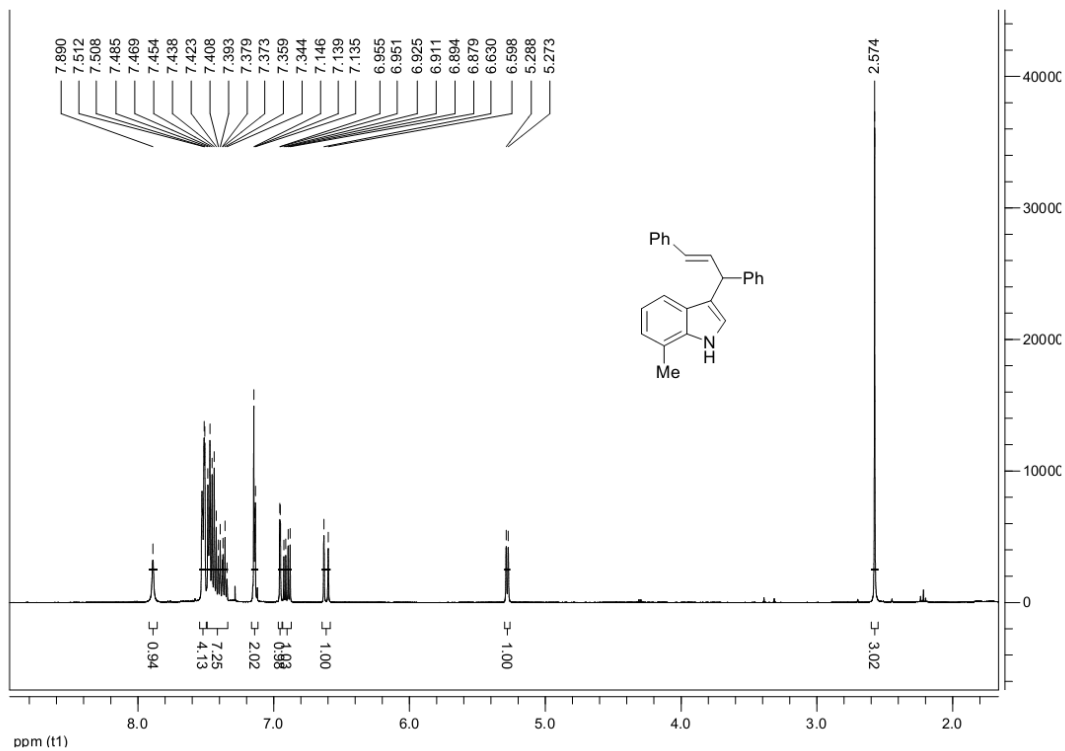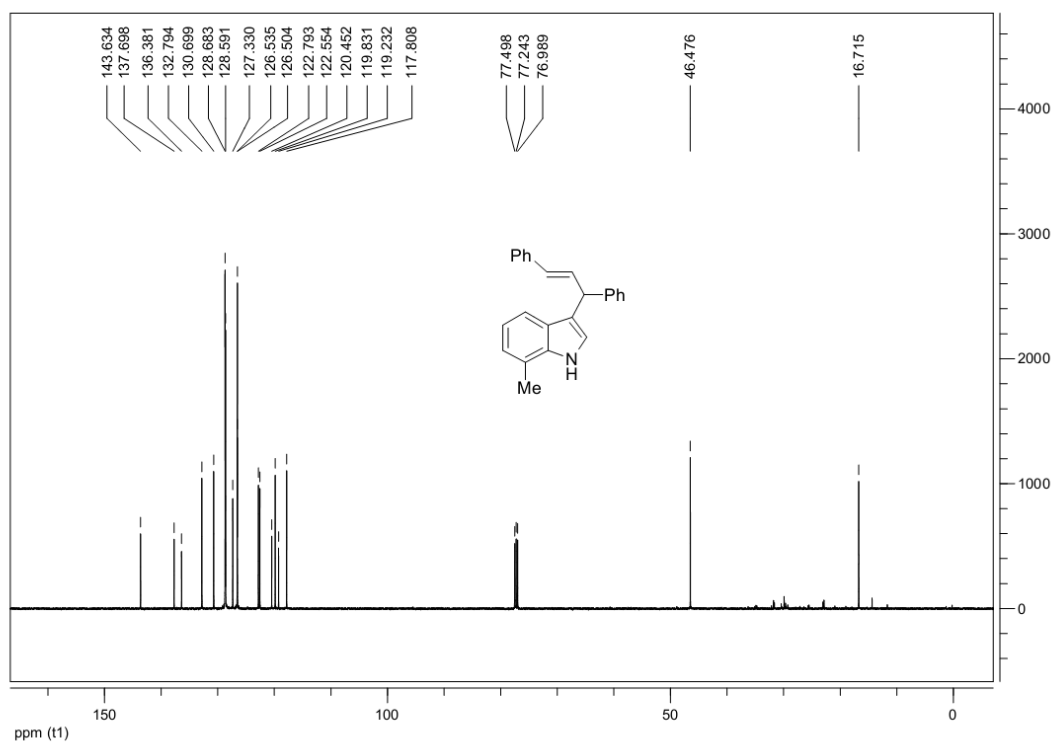

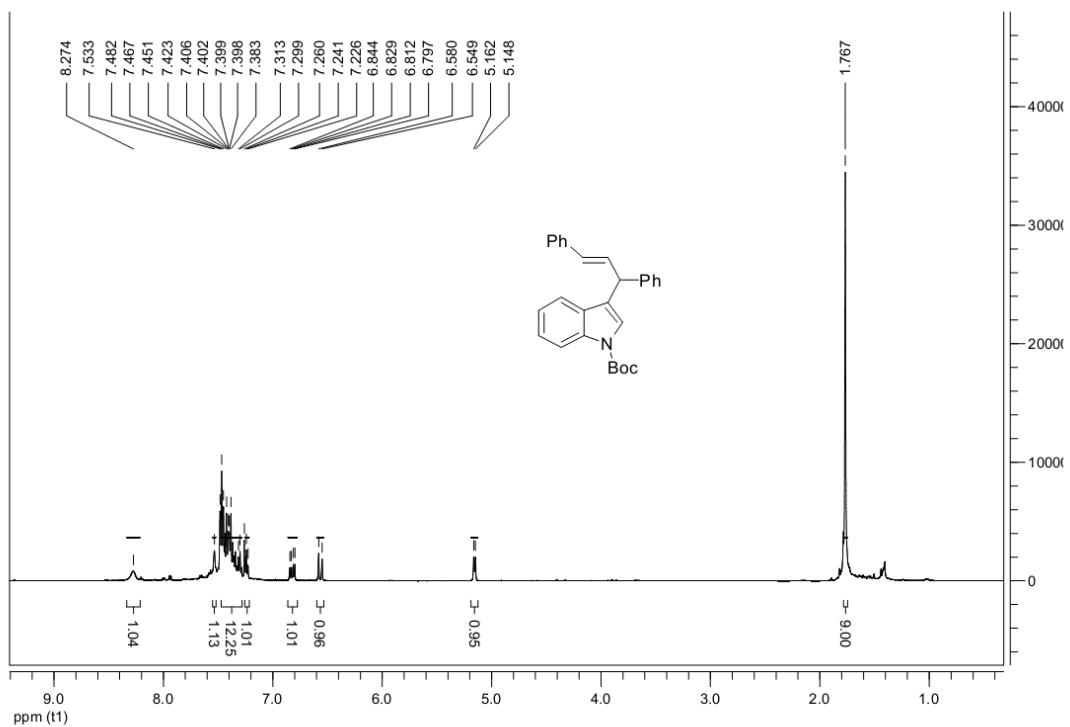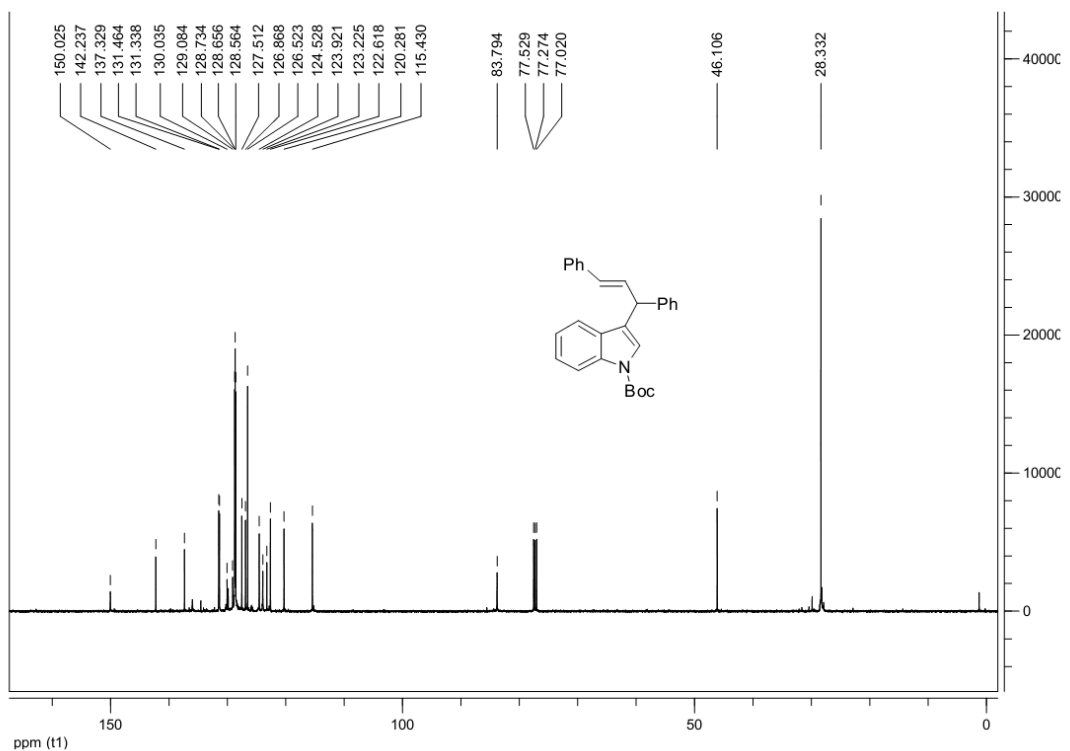

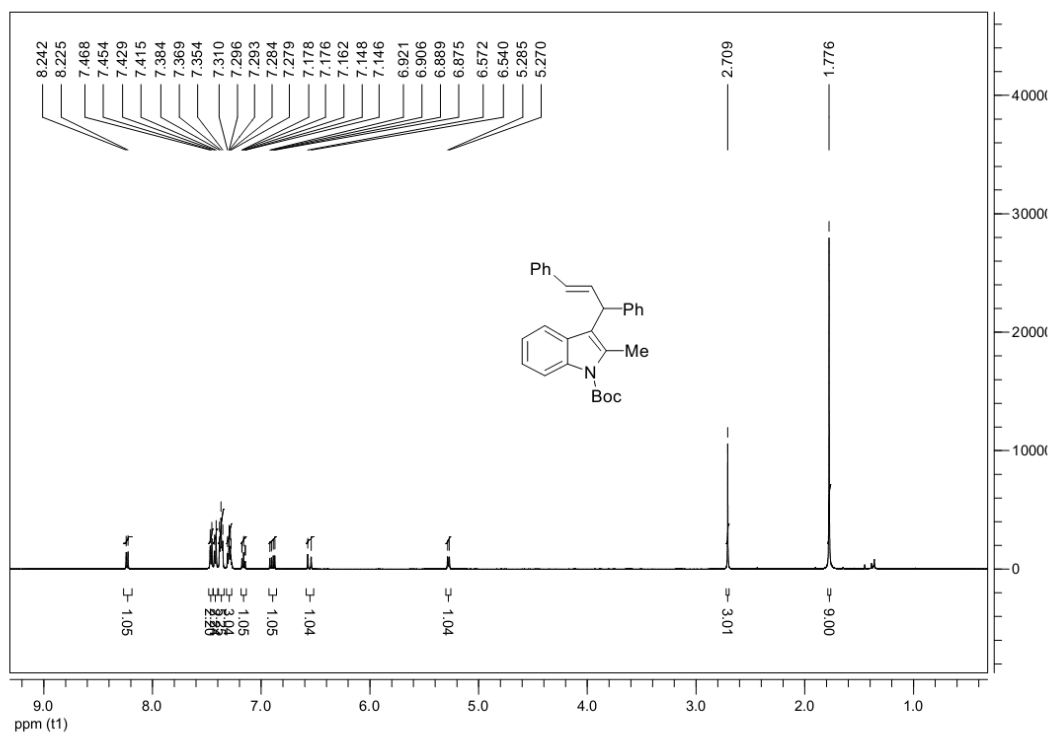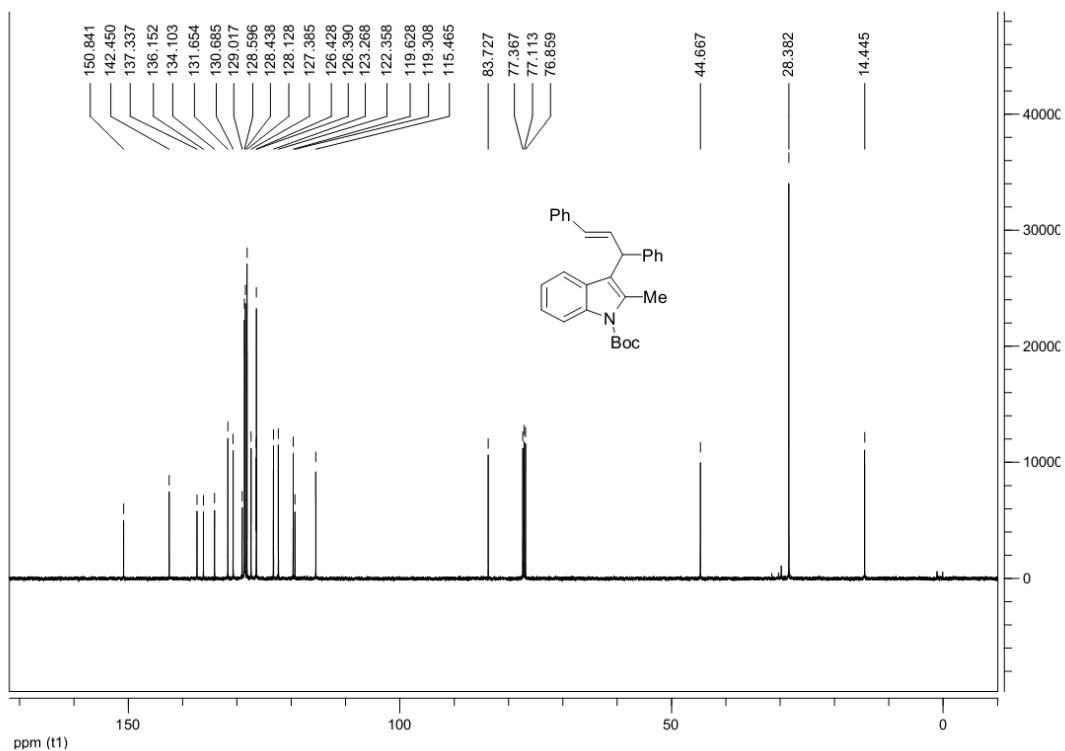

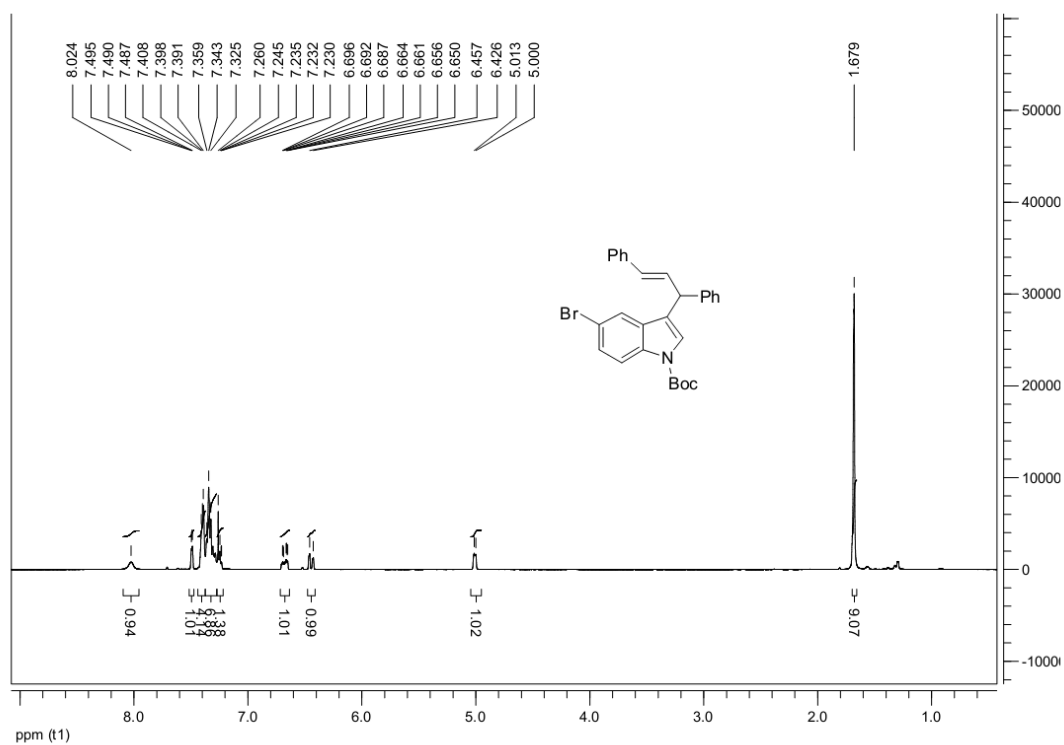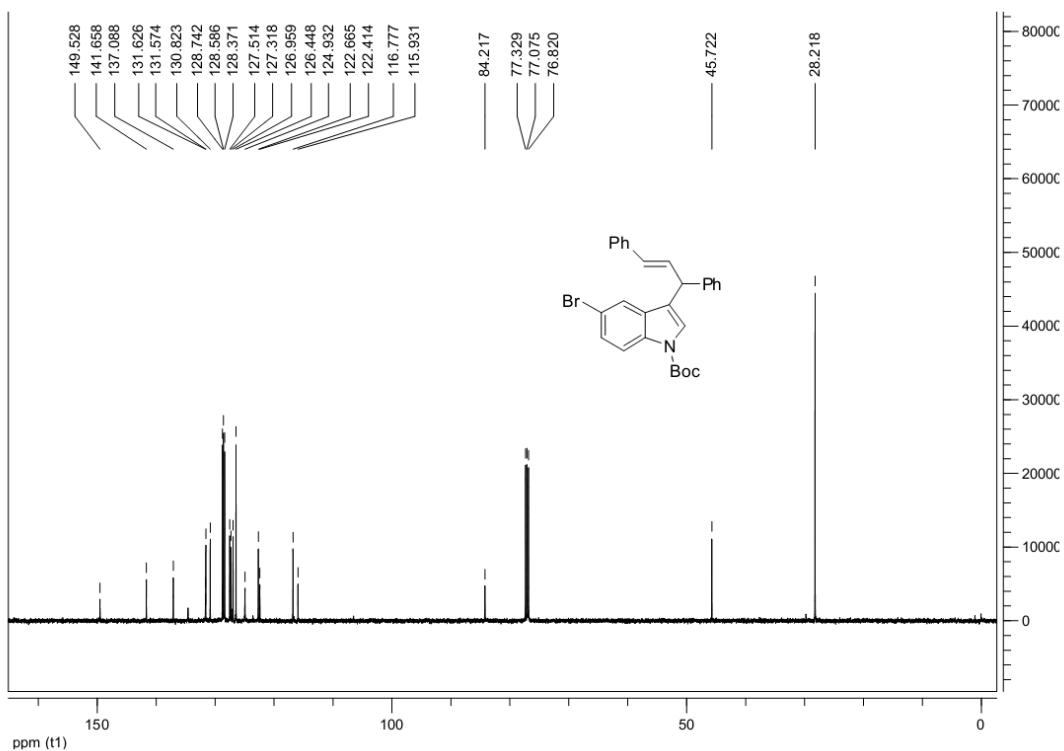

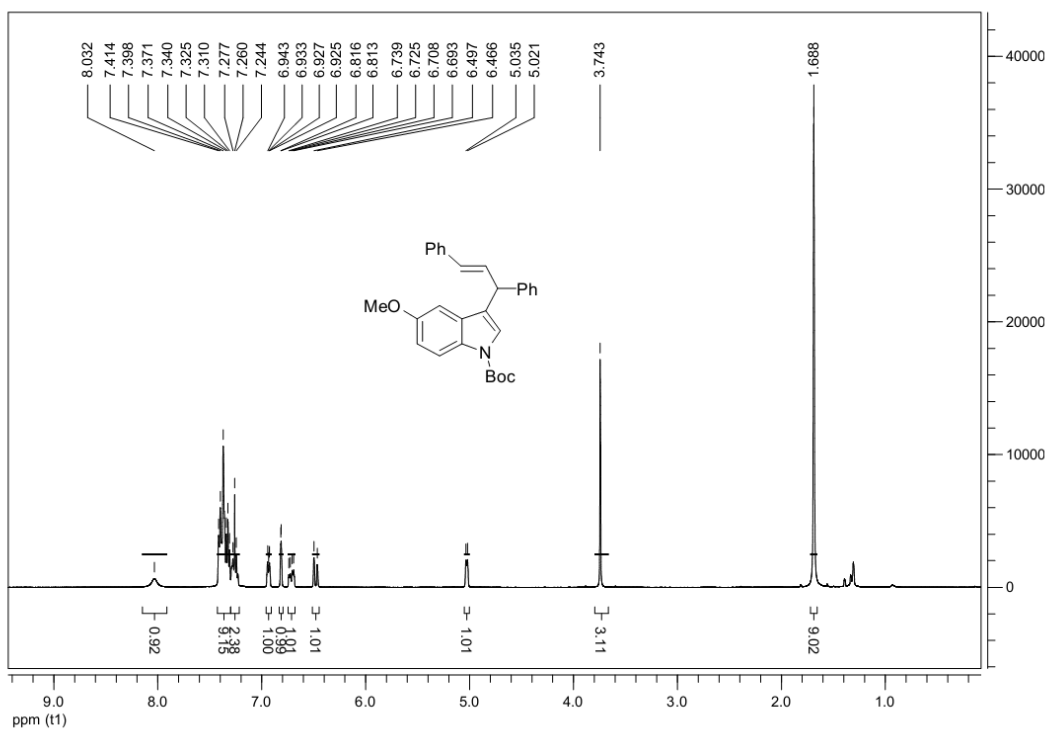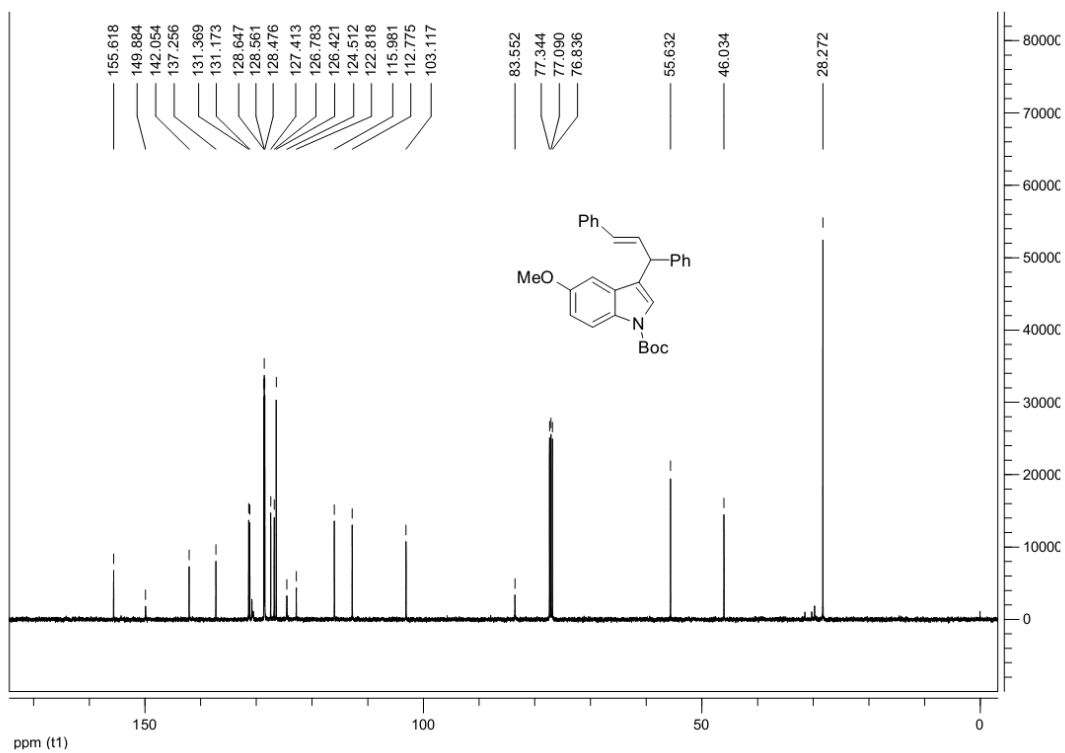

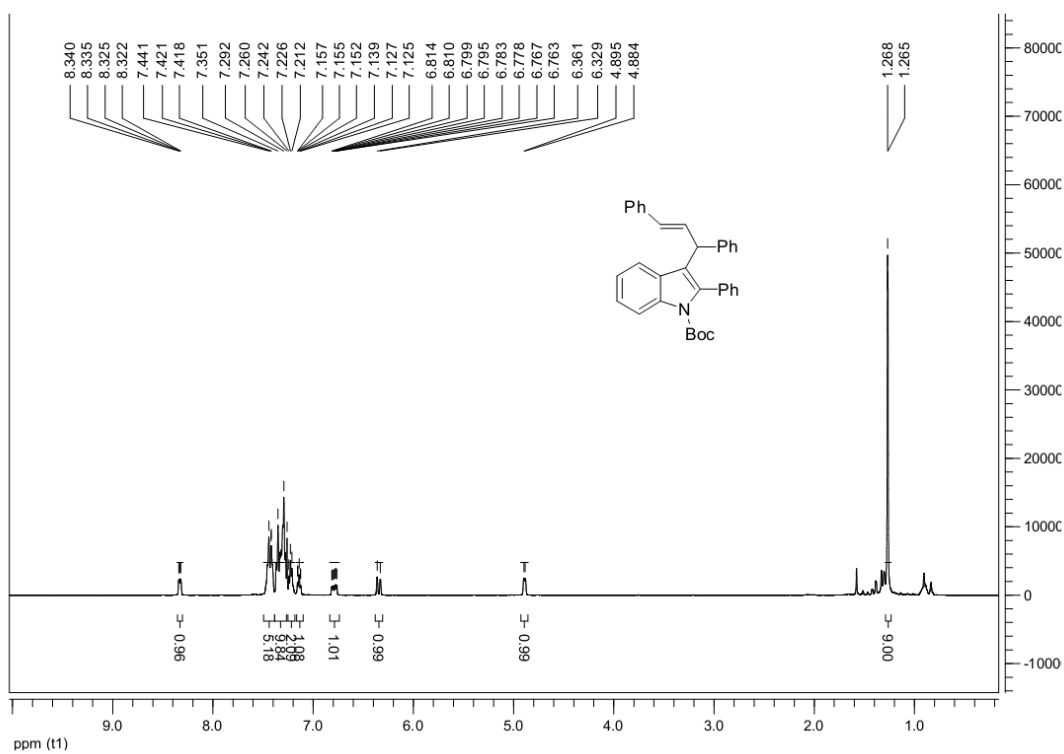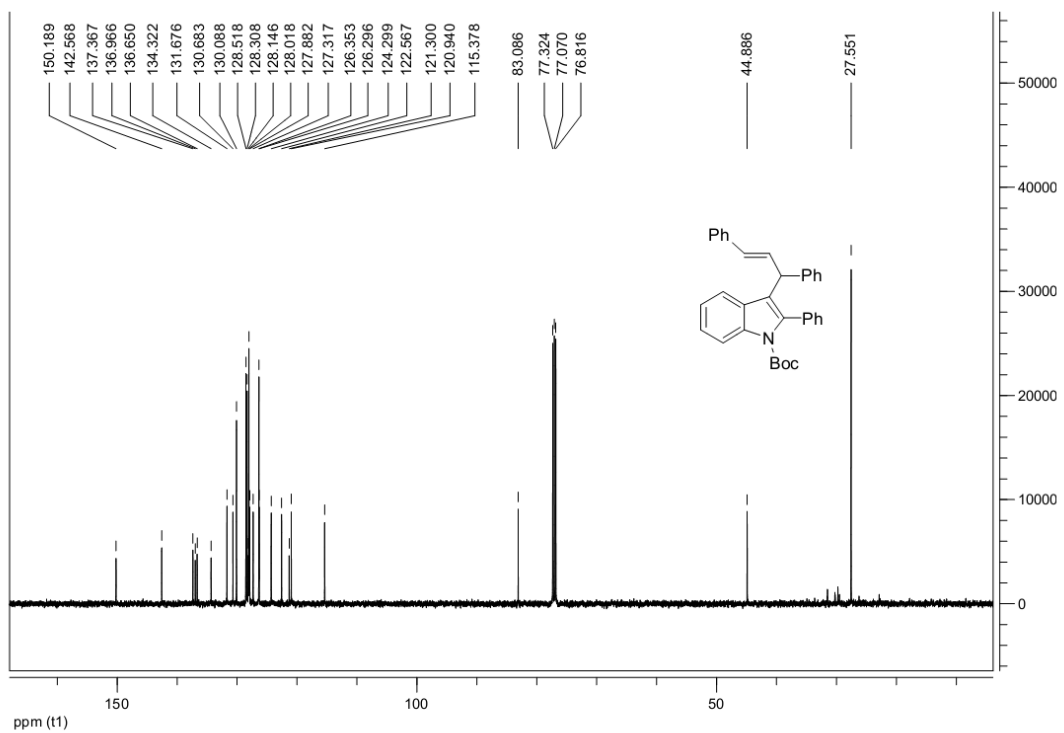



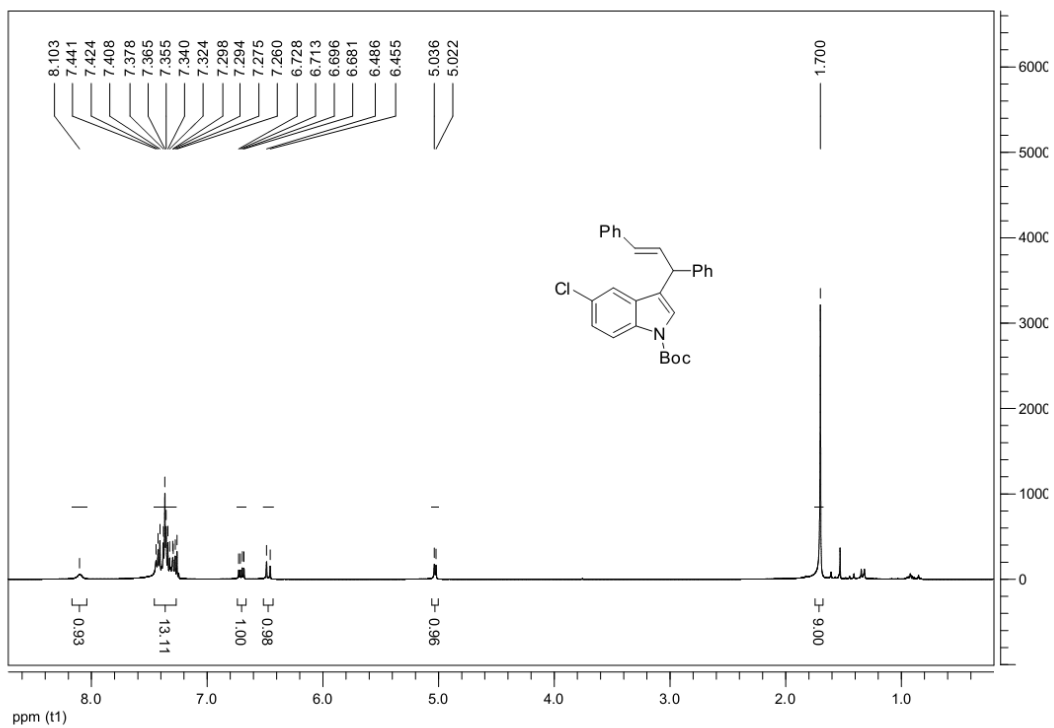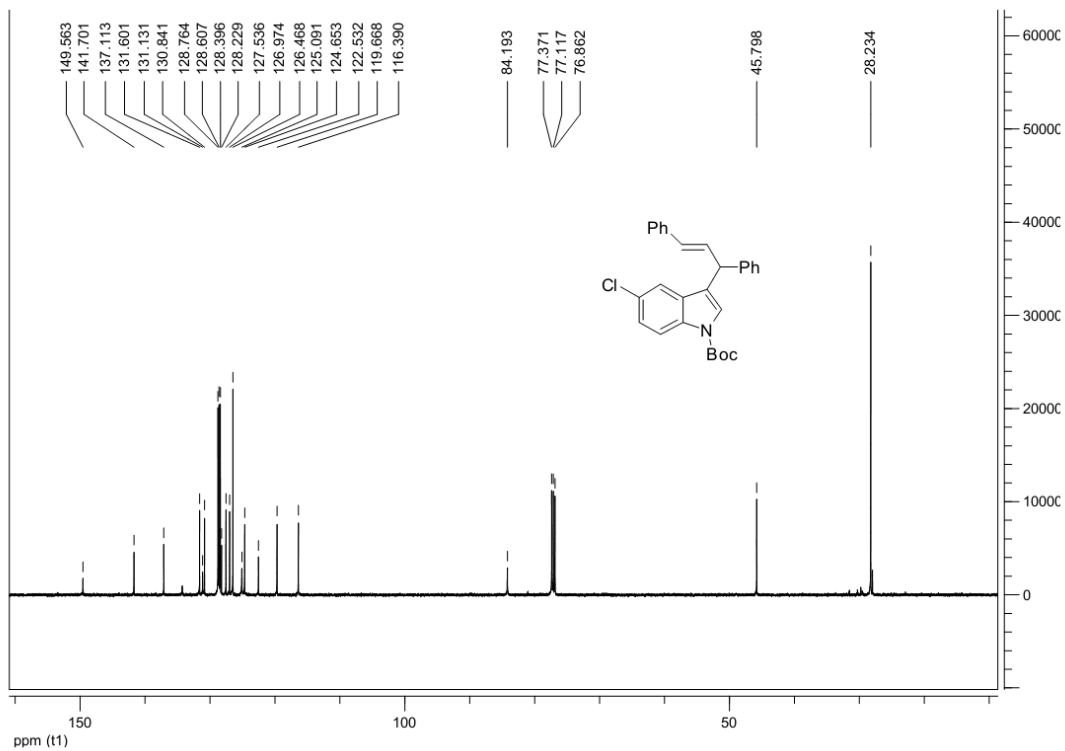

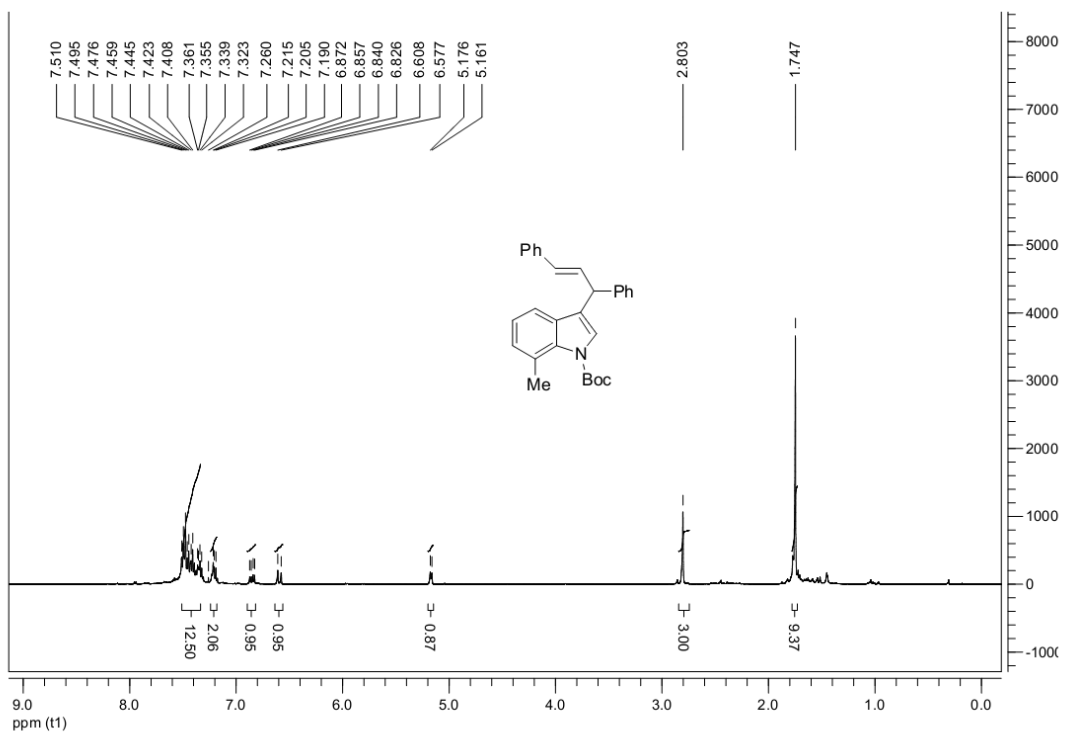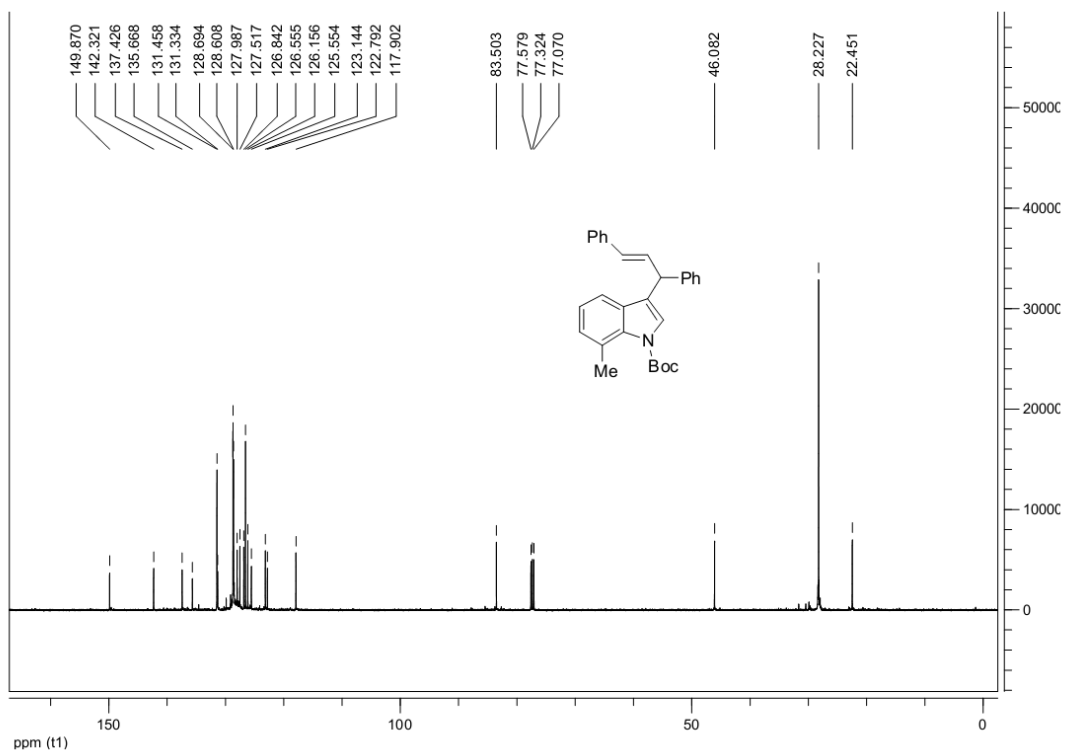

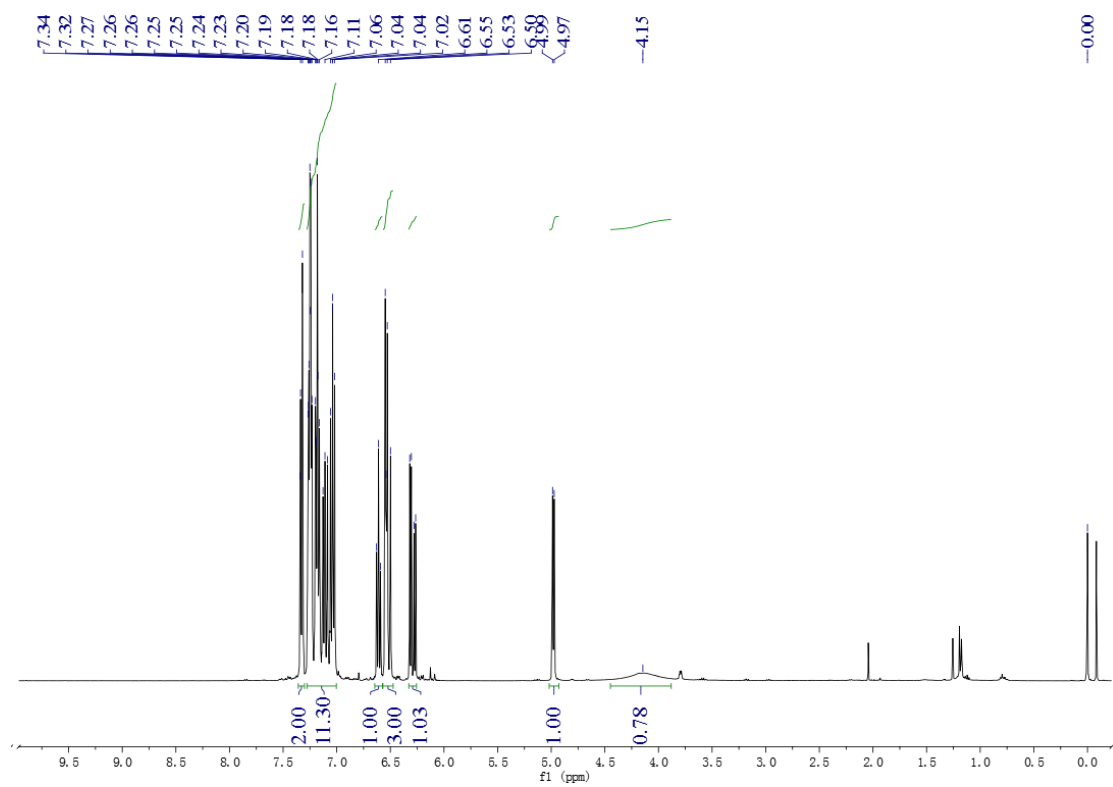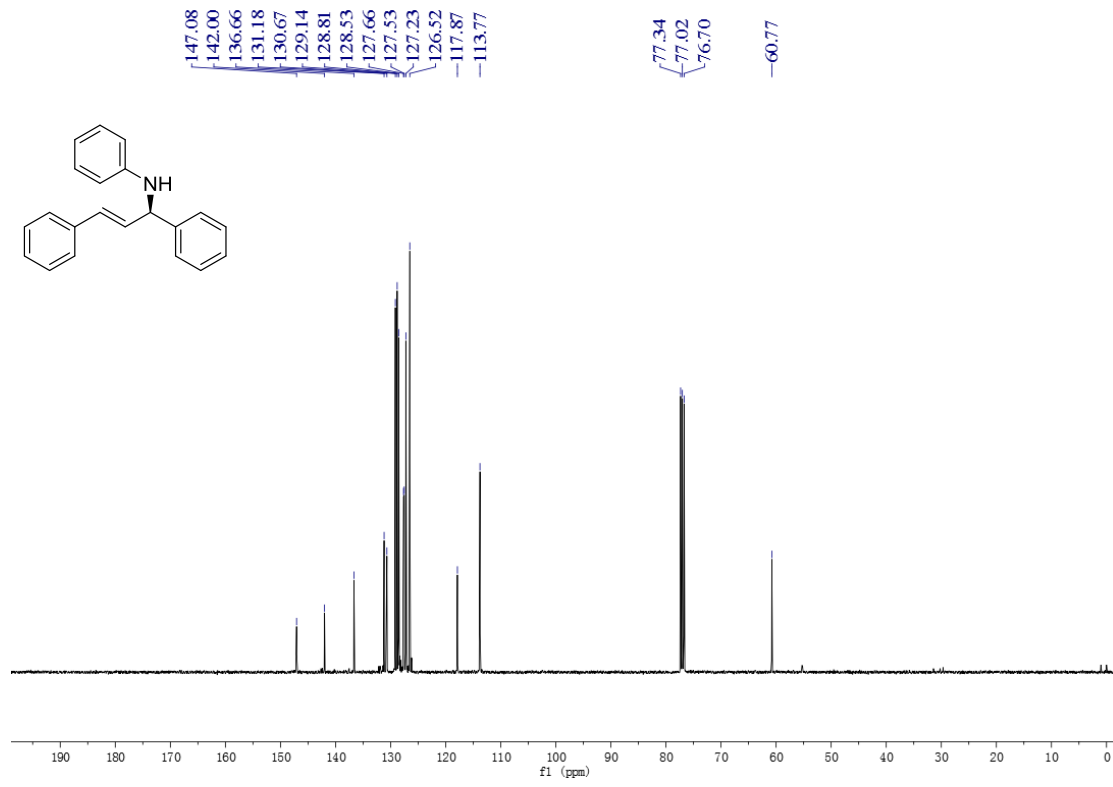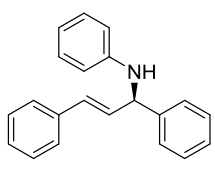

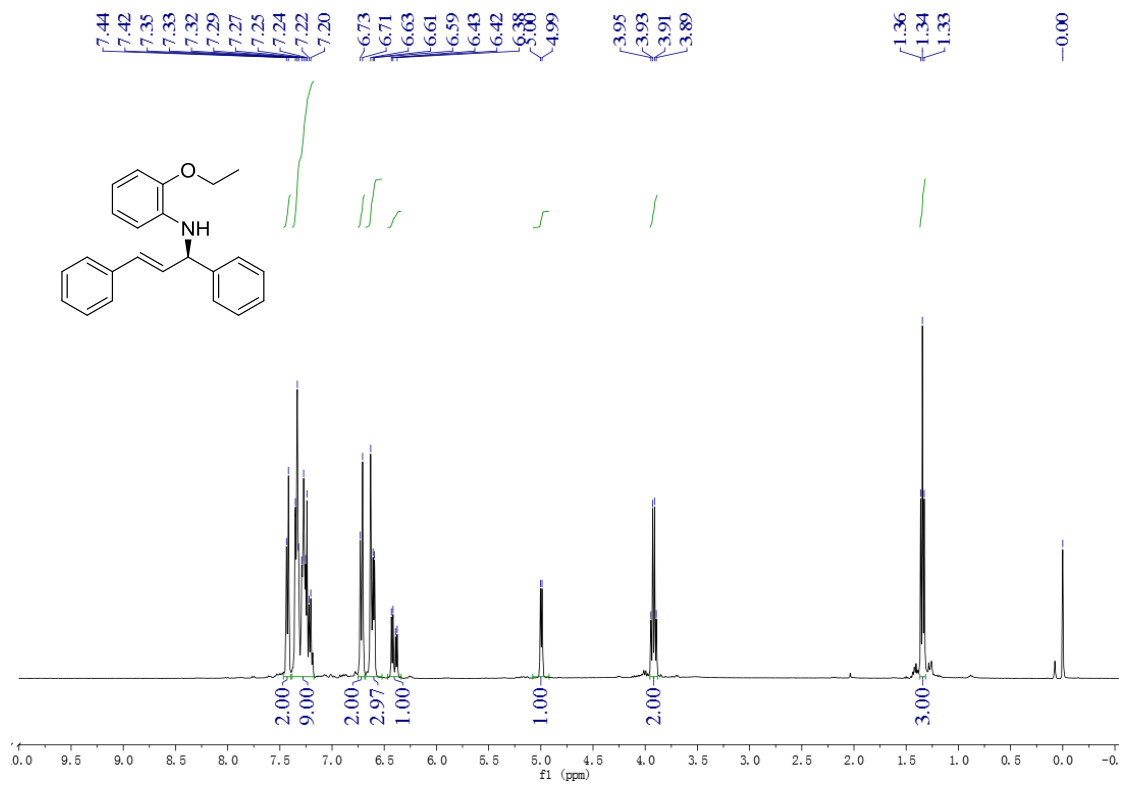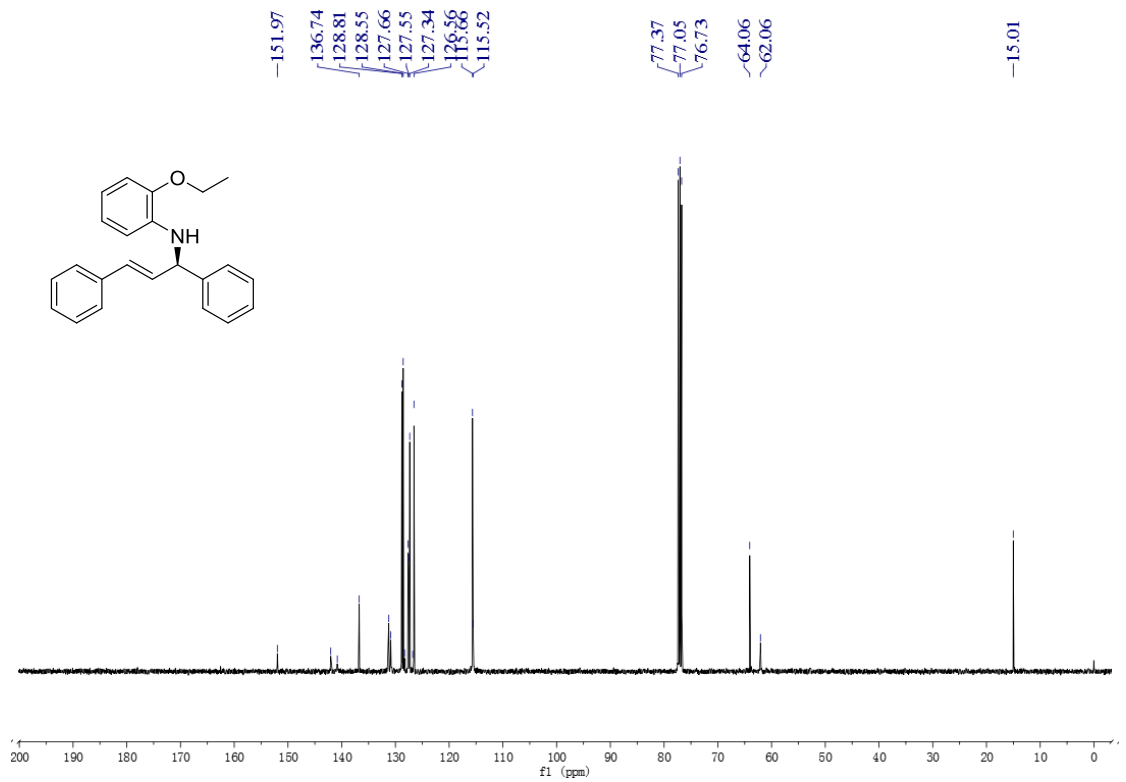

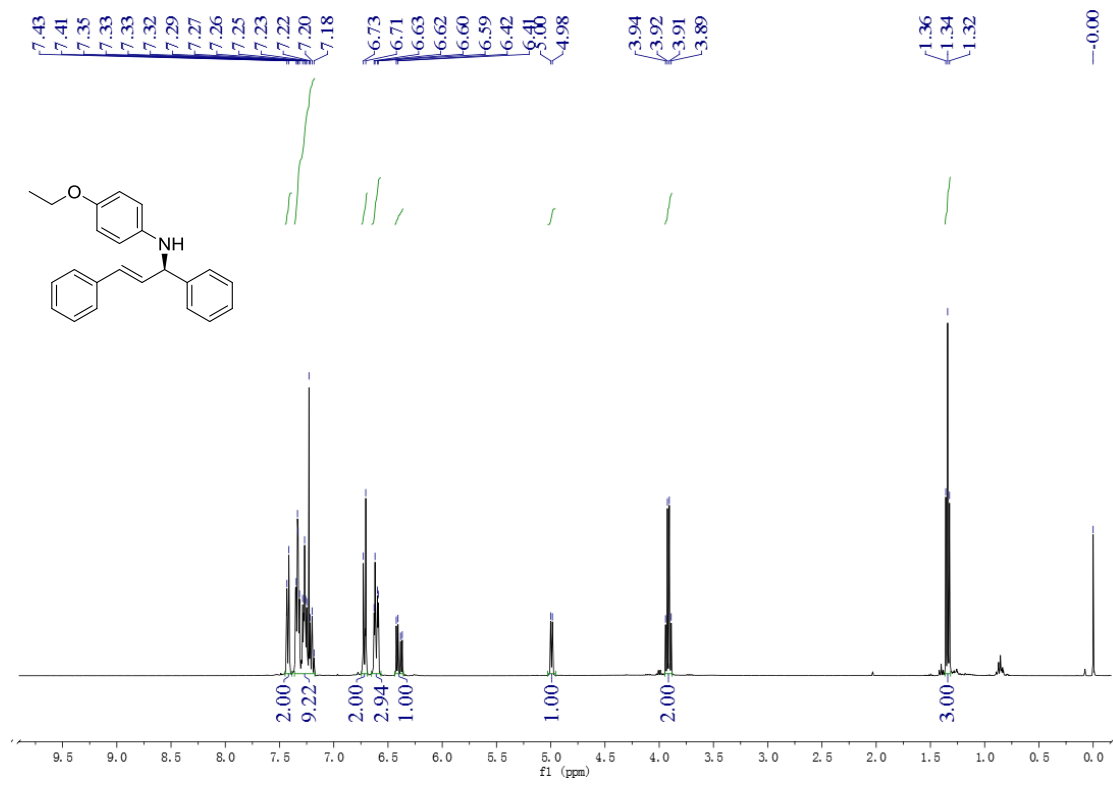

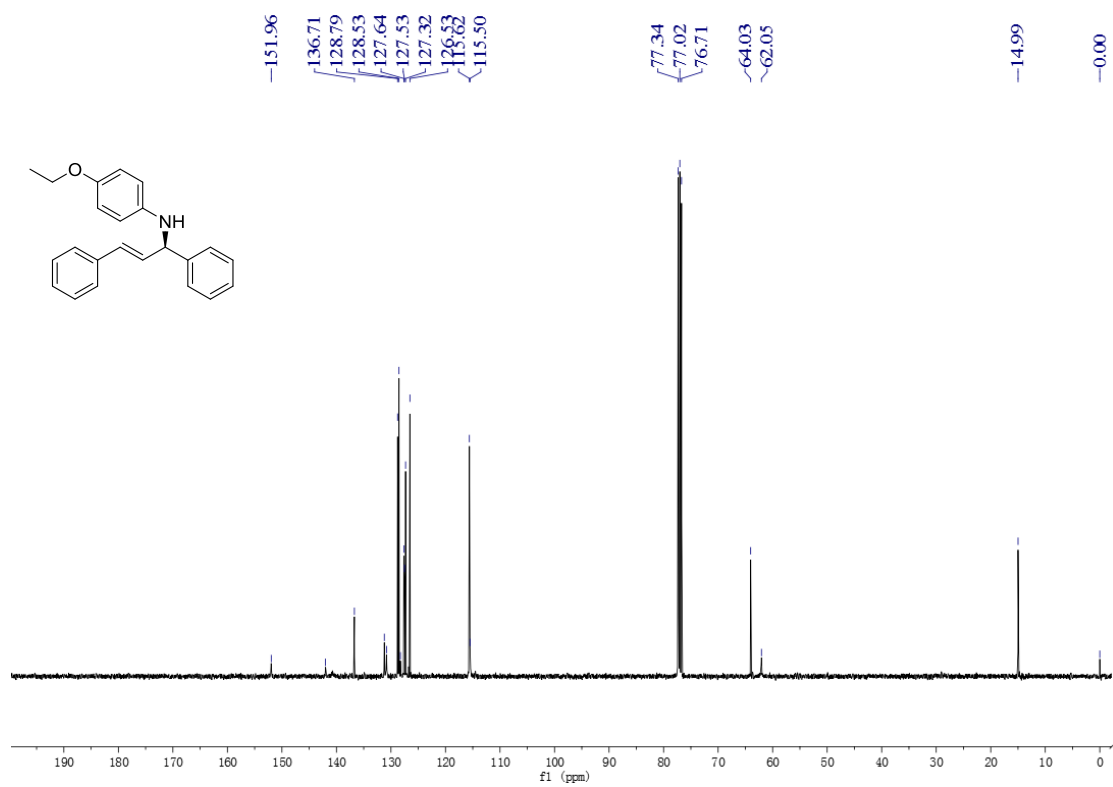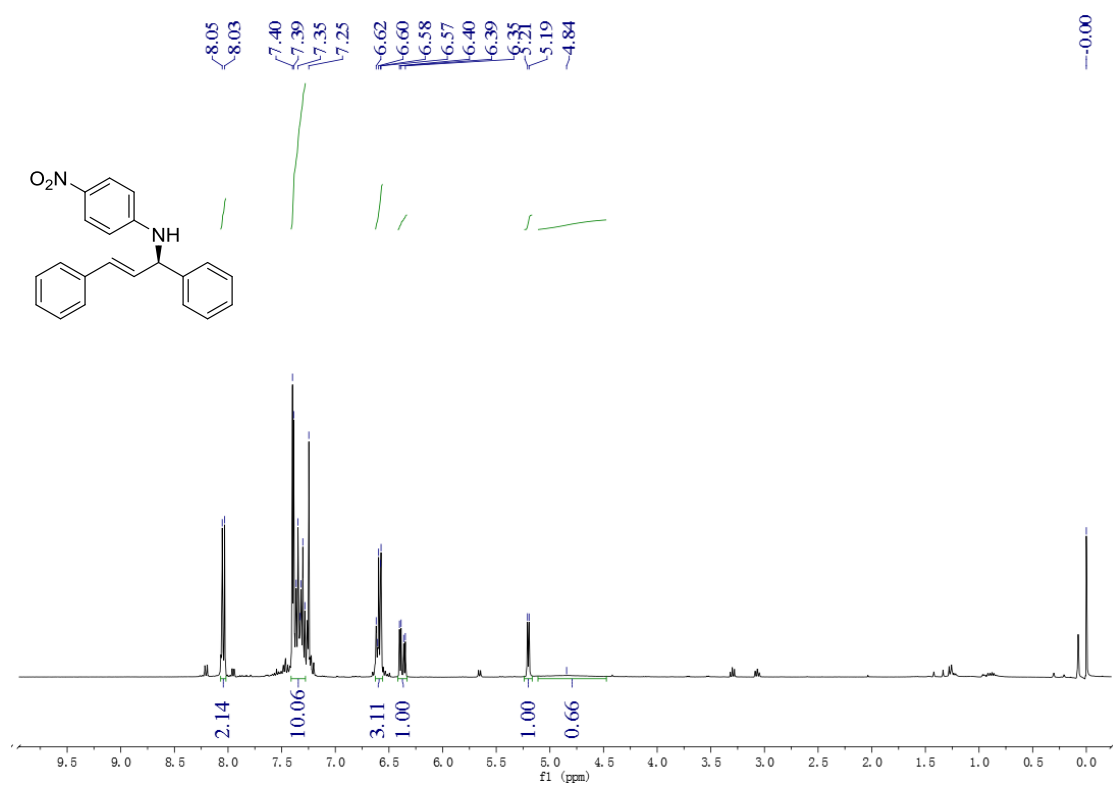

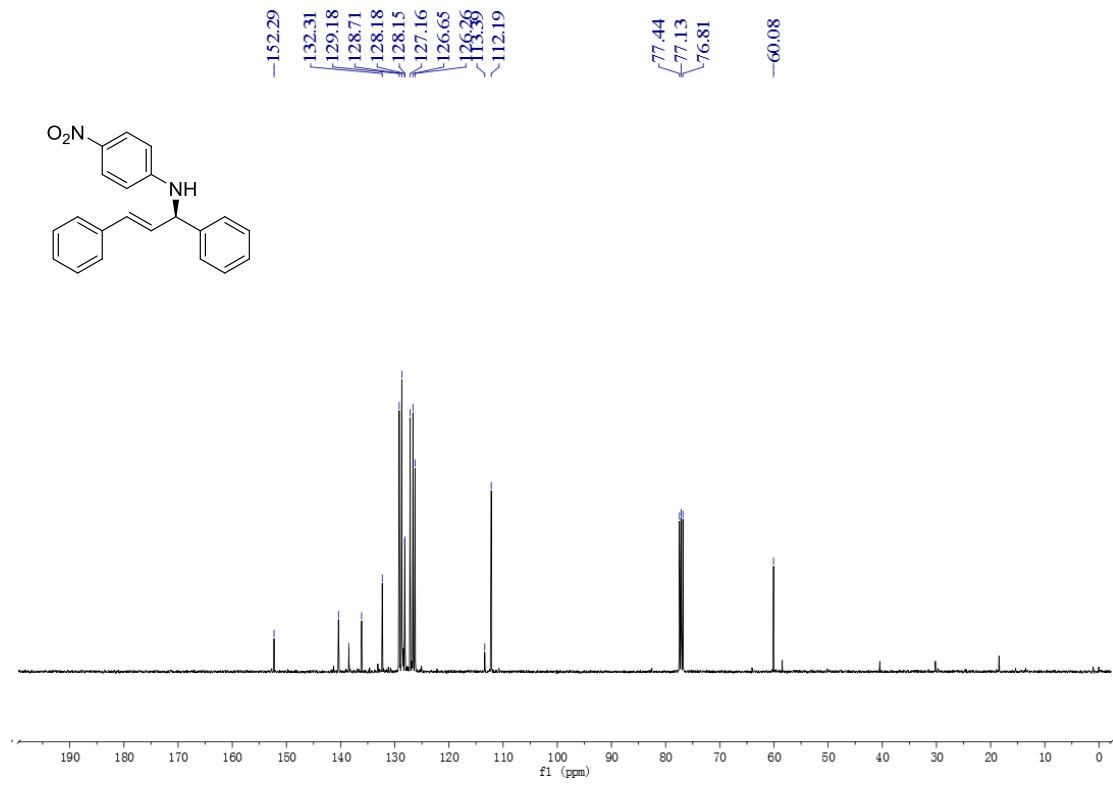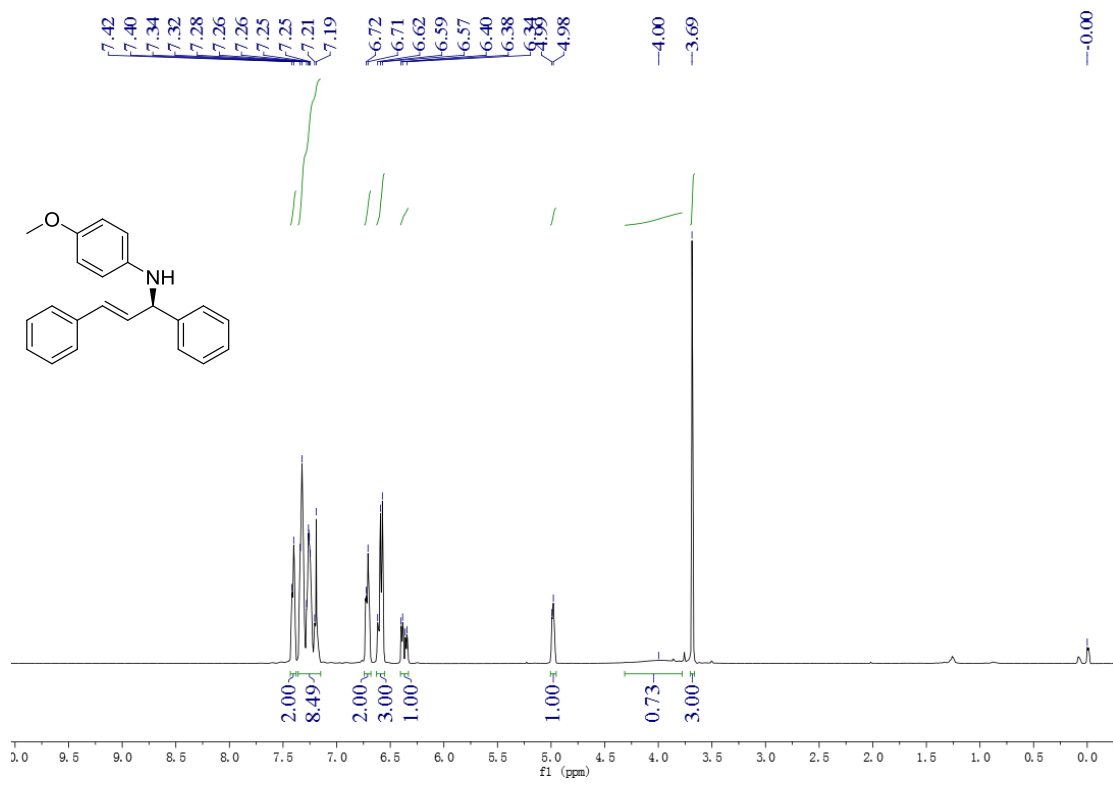

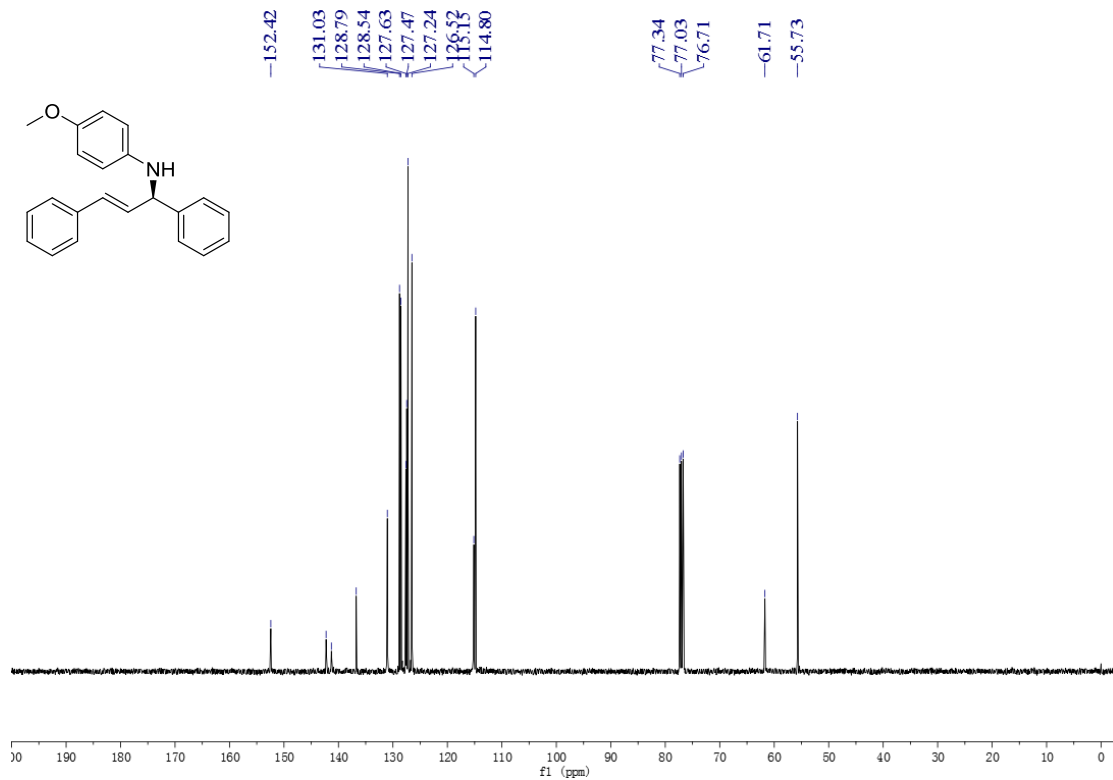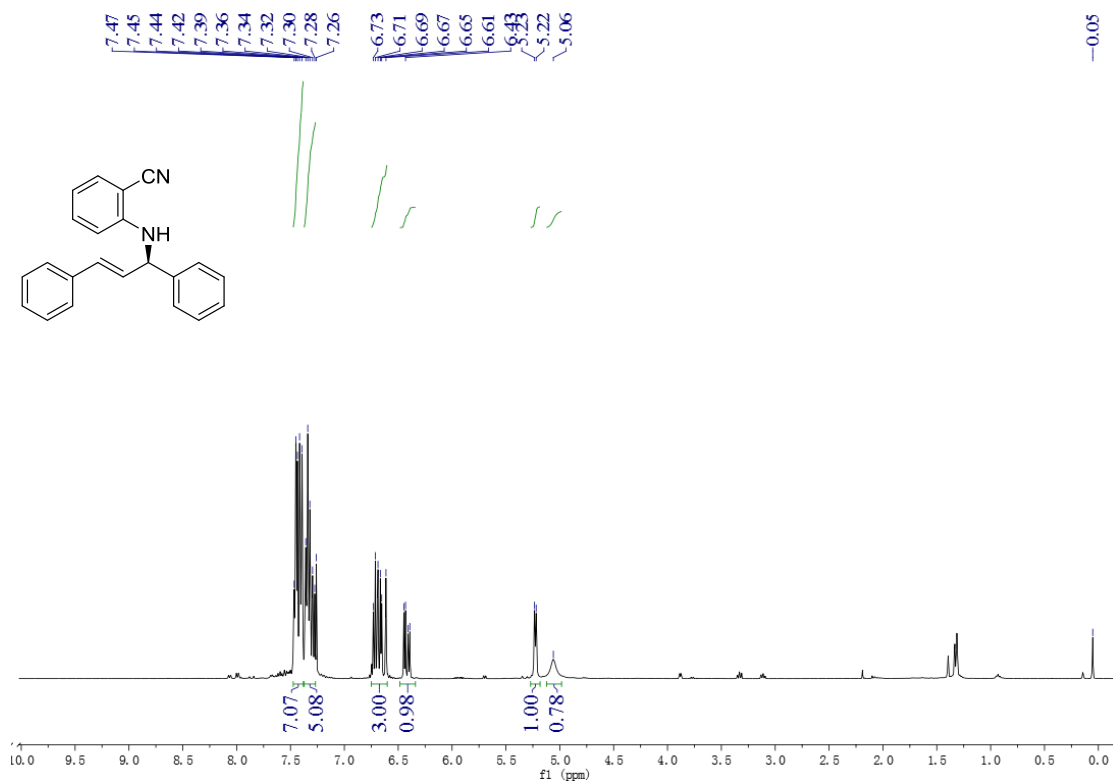



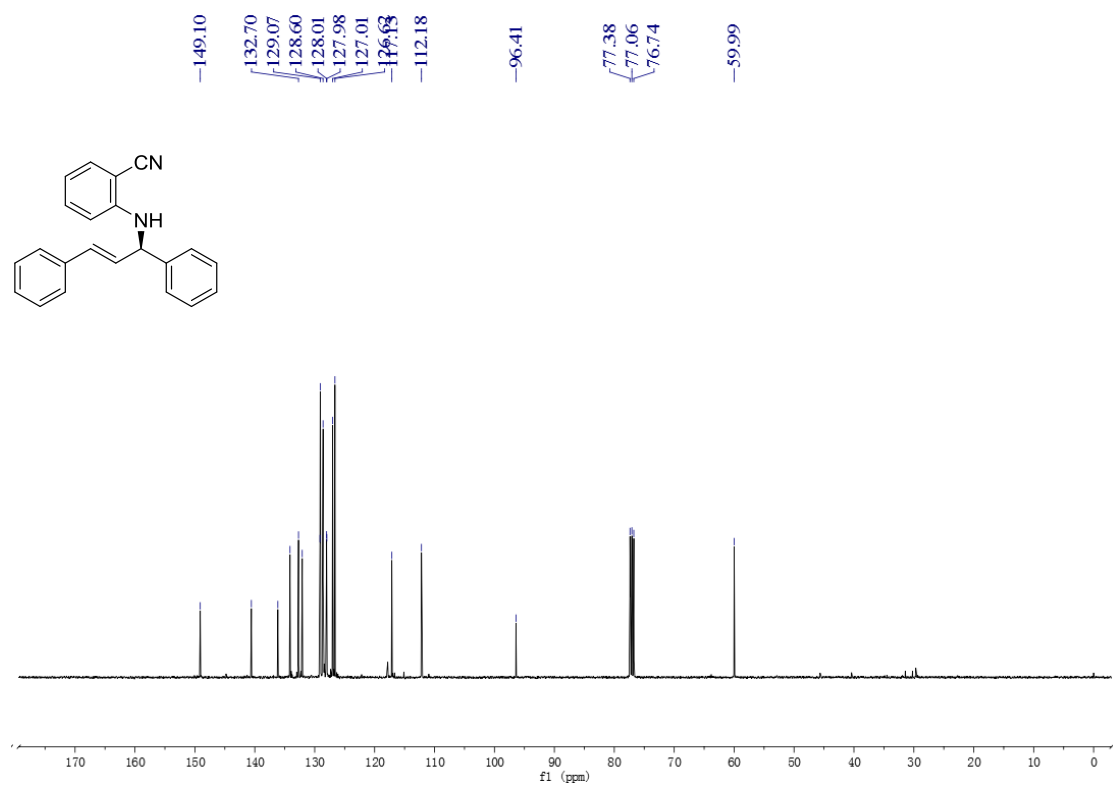

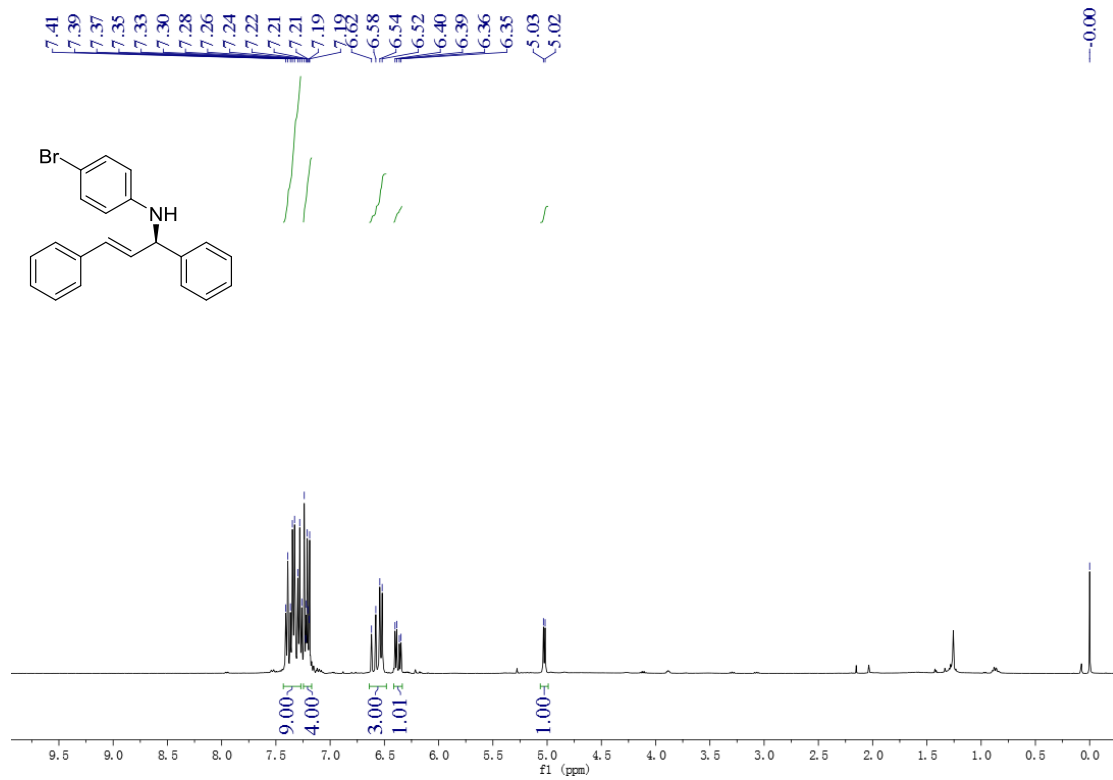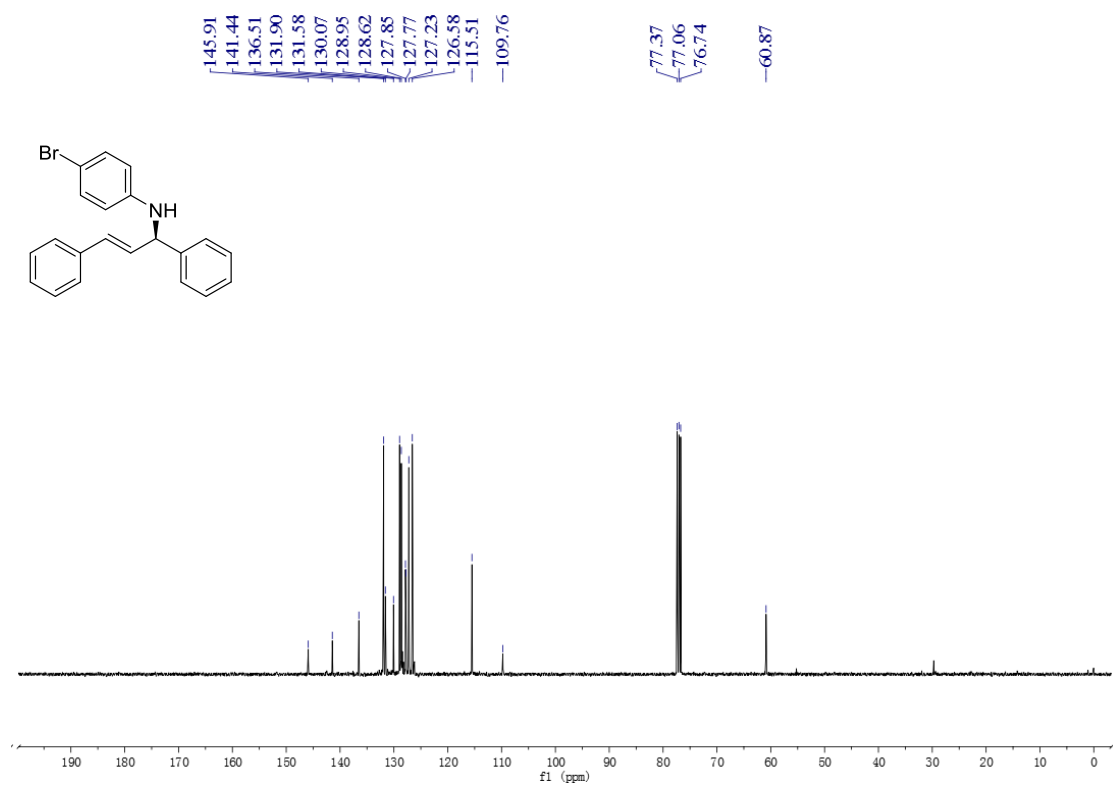

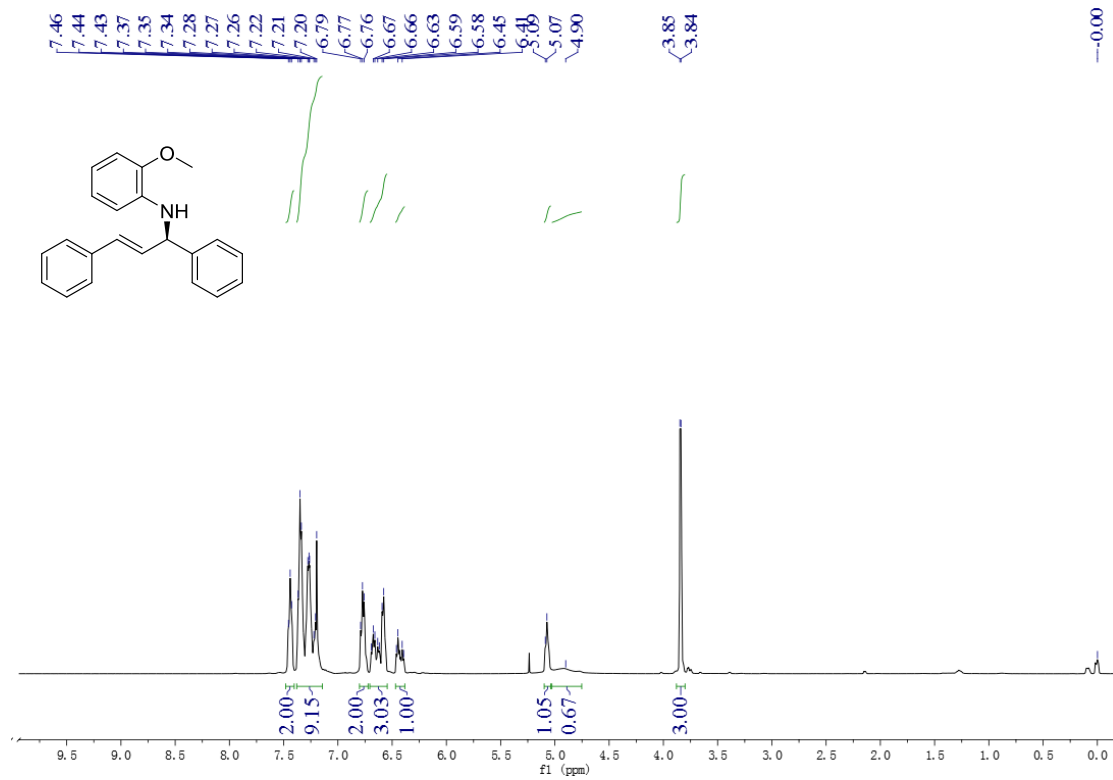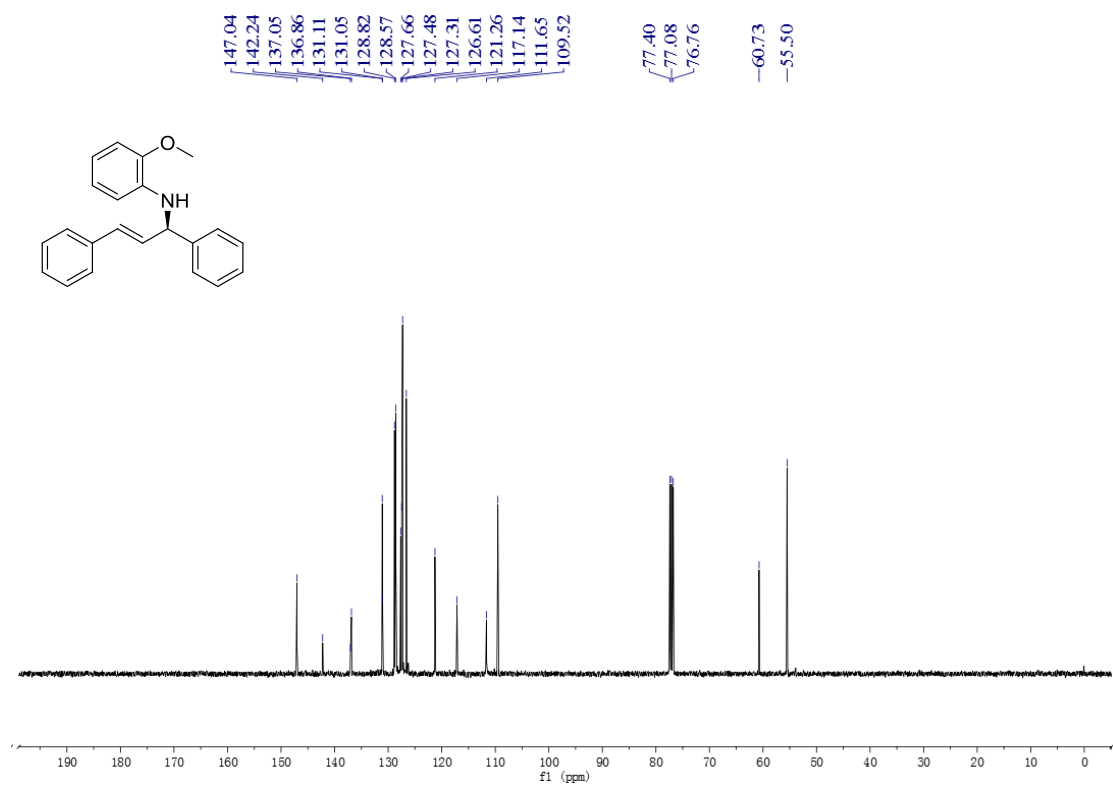

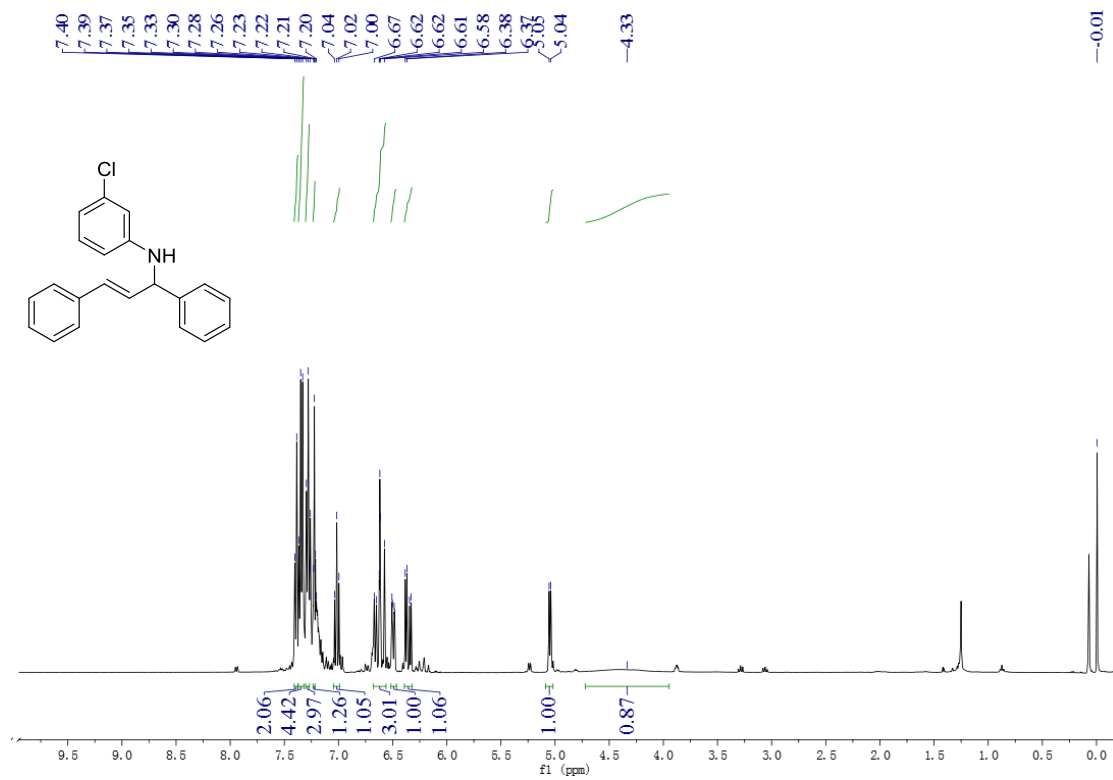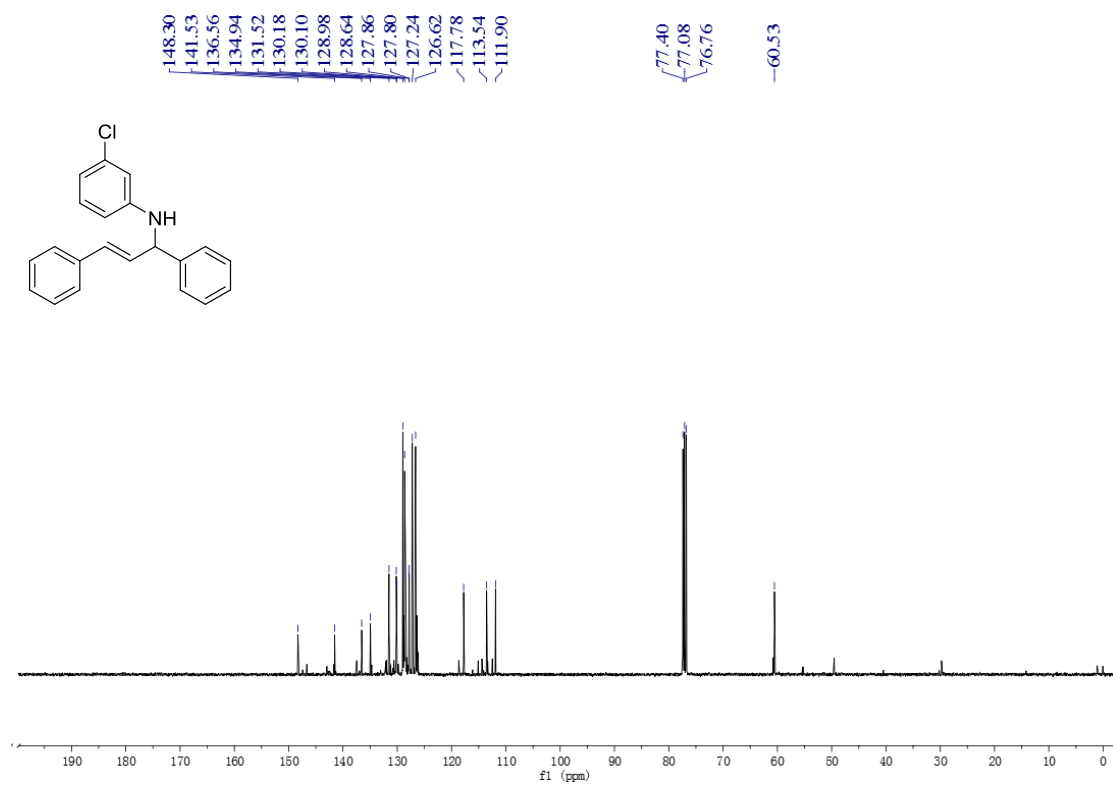

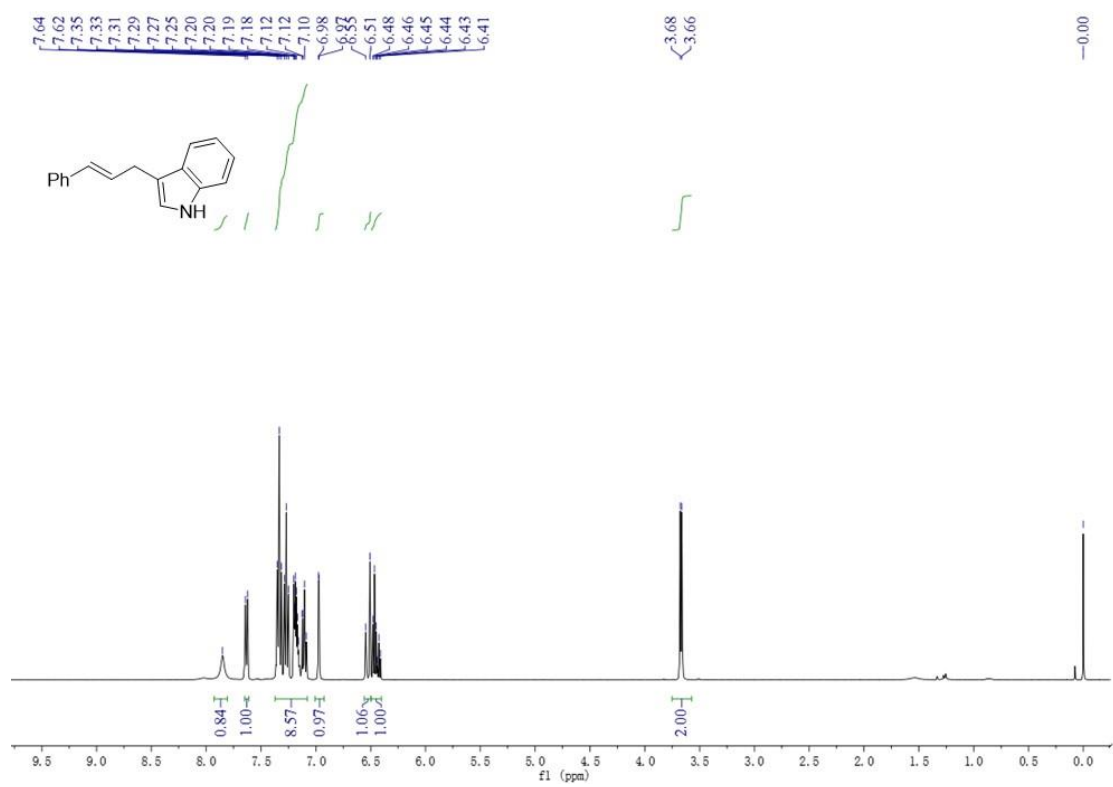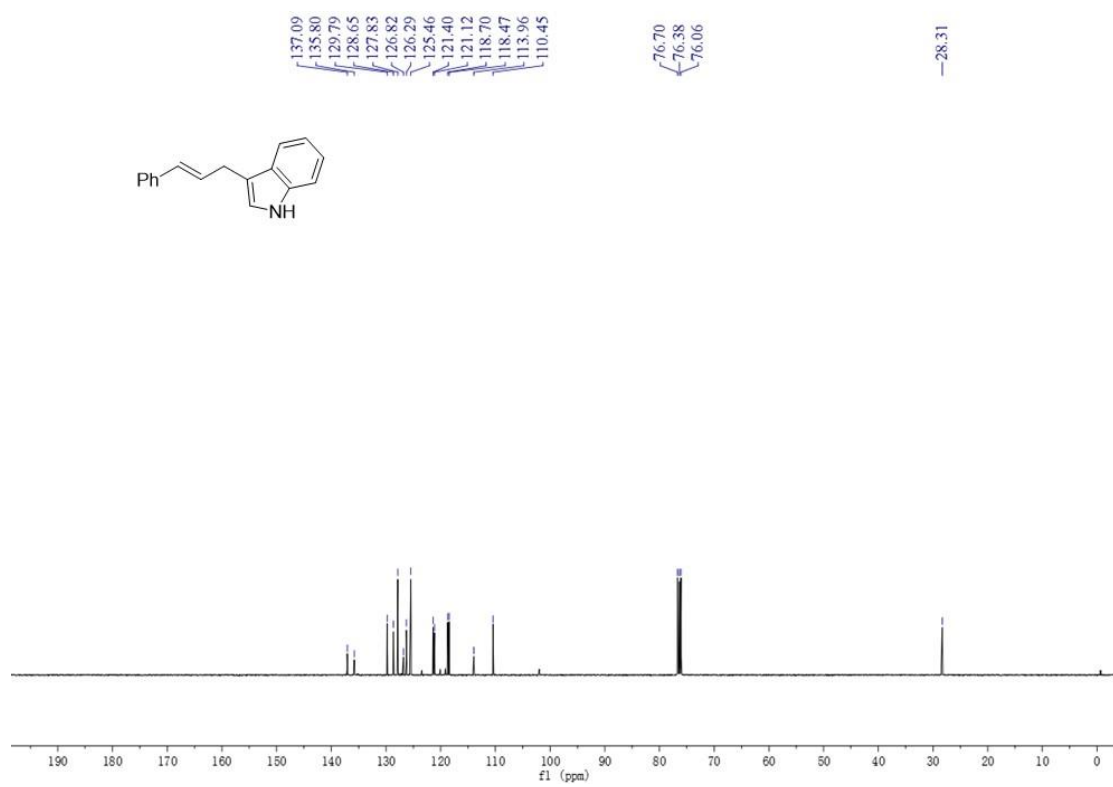

## 5. HPLC Spectra of products: Determination of *ee* values

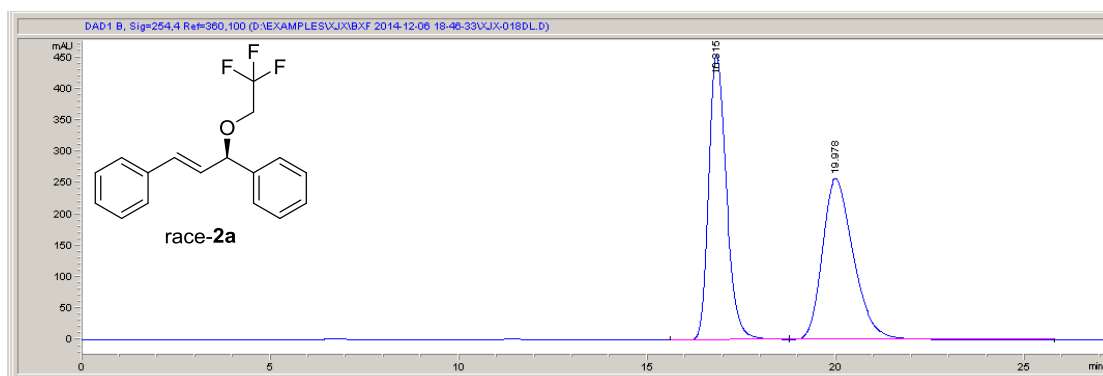

| # | Time   | Area    | Height | Width  | Symmetry | Area % |
|---|--------|---------|--------|--------|----------|--------|
| 1 | 16.815 | 14710.1 | 453.7  | 0.4982 | 0.701    | 49.929 |
| 2 | 19.978 | 14752   | 257    | 0.8816 | 0.695    | 50.071 |

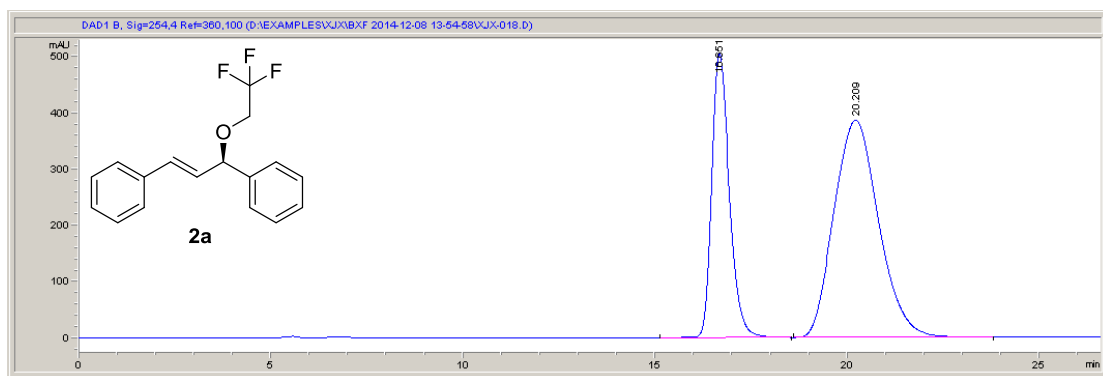

| # | Time   | Area    | Height | Width  | Symmetry | Area % |
|---|--------|---------|--------|--------|----------|--------|
| 1 | 16.651 | 16473.9 | 505.1  | 0.5045 | 0.693    | 34.648 |
| 2 | 20.209 | 31072.4 | 386.4  | 1.2661 | 0.893    | 65.352 |

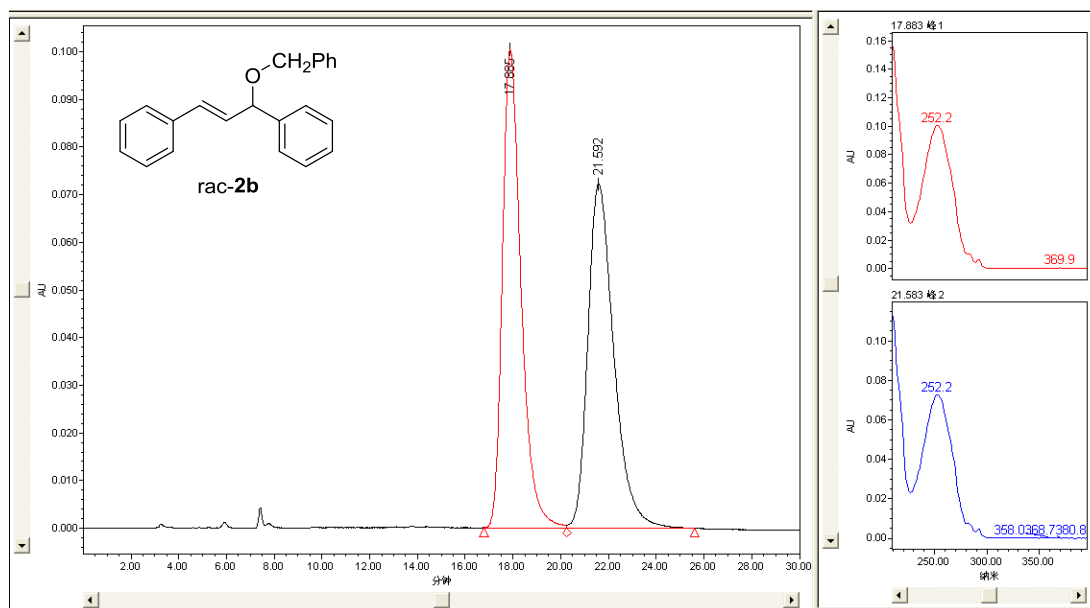

| # | Time   | Area    | Height | Area % |
|---|--------|---------|--------|--------|
| 1 | 17.885 | 5450629 | 100303 | 49.95  |
| 2 | 21.592 | 5461961 | 72293  | 50.05  |

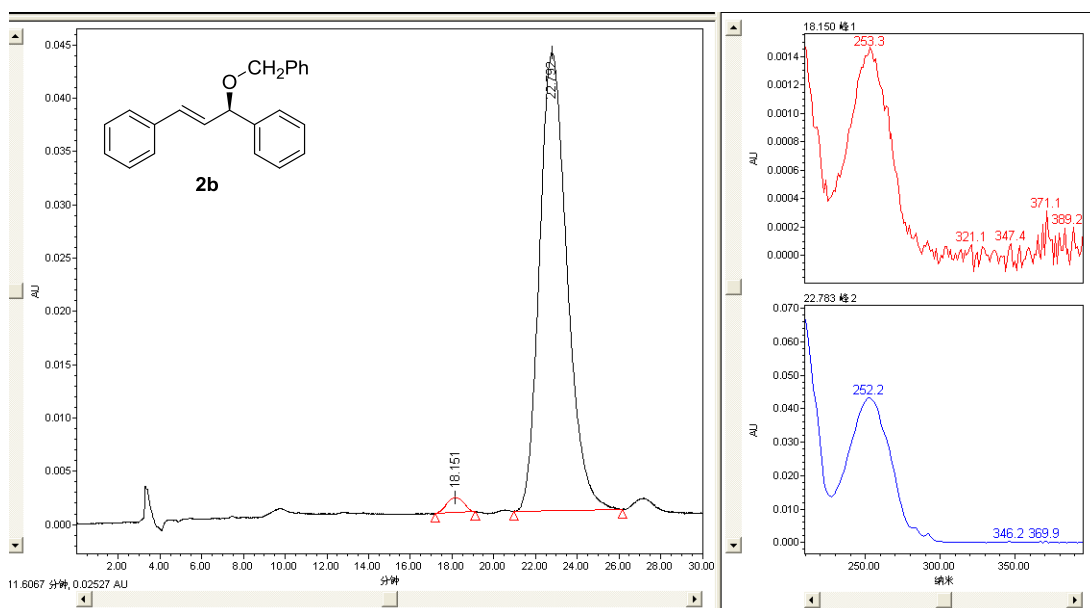

| # | Time   | Area    | Height | Area % |
|---|--------|---------|--------|--------|
| 1 | 18.151 | 81168   | 1448   | 2.02   |
| 2 | 22.792 | 3945386 | 42966  | 97.98  |

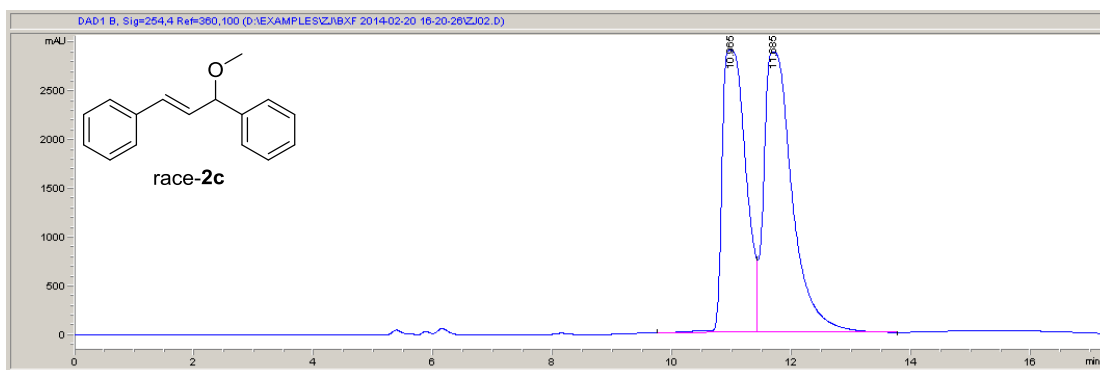

| # | Time   | Area    | Height | Width  | Symmetry | Area % |
|---|--------|---------|--------|--------|----------|--------|
| 1 | 10.965 | 79209   | 2902.3 | 0.4264 | 0.506    | 45.491 |
| 2 | 11.685 | 94910.4 | 2881.7 | 0.4962 | 0.461    | 54.509 |

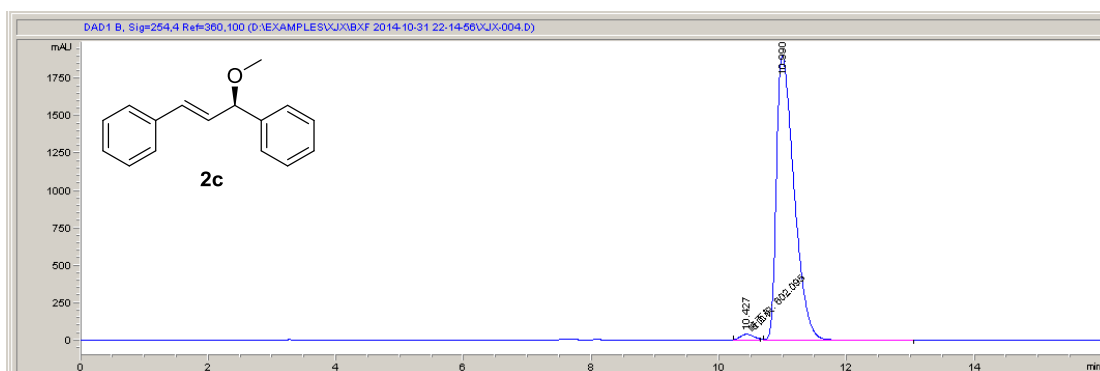

| # | Time   | Area    | Height | Width  | Symmetry | Area % |
|---|--------|---------|--------|--------|----------|--------|
| 1 | 10.427 | 602.1   | 39.7   | 0.2526 | 0.885    | 1.613  |
| 2 | 10.99  | 36731.4 | 1900.7 | 0.2975 | 0.496    | 98.387 |

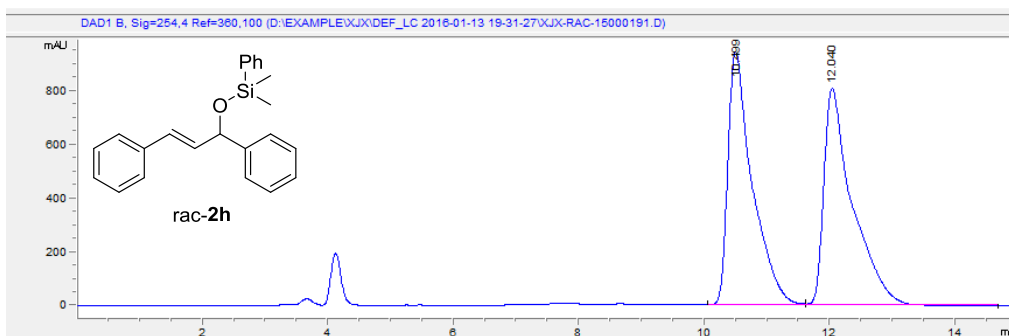

| # | Time   | Area    | Height | Width  | Symmetry | Area % |
|---|--------|---------|--------|--------|----------|--------|
| 1 | 10.499 | 25380.1 | 942    | 0.3863 | 0.426    | 49.895 |
| 2 | 12.04  | 25486.7 | 807.8  | 0.4441 | 0.378    | 50.105 |



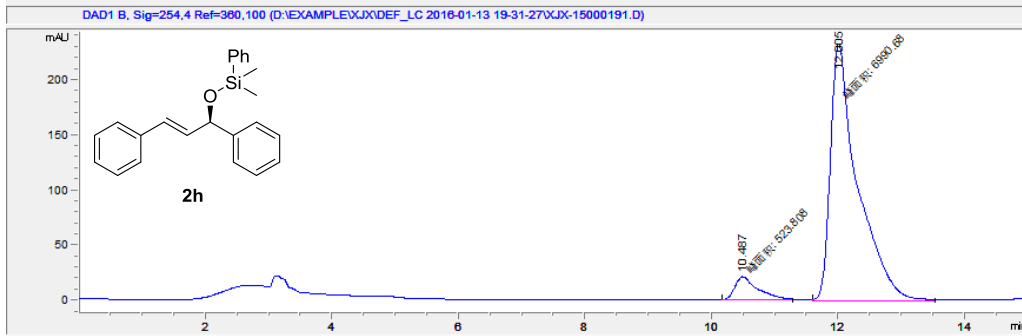

| # | Time   | Area   | Height | Width  | Symmetry | Area % |
|---|--------|--------|--------|--------|----------|--------|
| 1 | 10.487 | 523.8  | 20.8   | 0.4188 | 0.491    | 6.917  |
| 2 | 12.005 | 6990.7 | 233    | 0.5    | 0.419    | 93.029 |

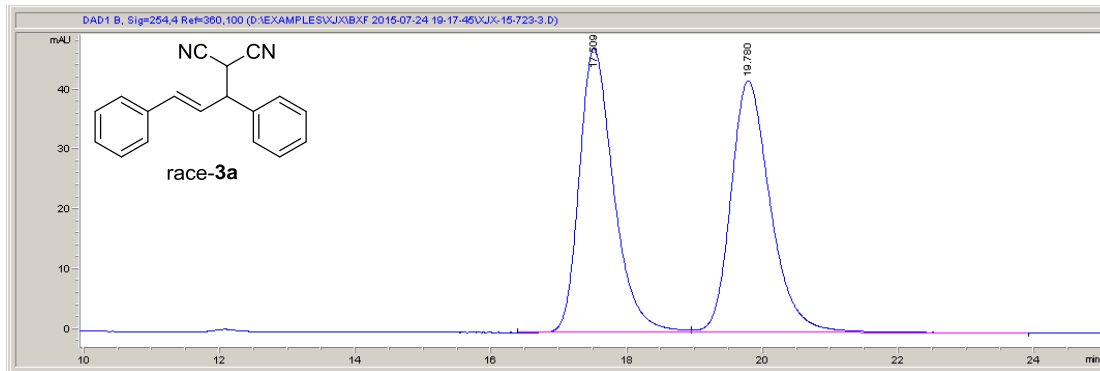

| # | Time   | Area   | Height | Width  | Symmetry | Area % |
|---|--------|--------|--------|--------|----------|--------|
| 1 | 17.509 | 1671.4 | 47.4   | 0.5353 | 0.694    | 49.420 |
| 2 | 19.78  | 1710.6 | 42.1   | 0.6182 | 0.718    | 50.580 |

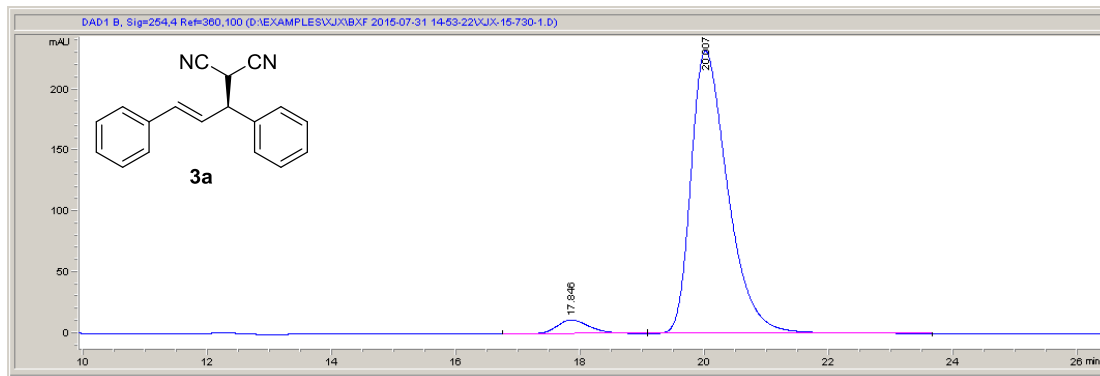

| # | Time   | Area | Height | Width | Symmetry | Area % |
|---|--------|------|--------|-------|----------|--------|
| 1 | 17.846 |      |        |       |          |        |
| 2 | 20.067 |      |        |       |          |        |

|   |        |        |       |        |       |        |
|---|--------|--------|-------|--------|-------|--------|
| 1 | 17.846 | 421.3  | 11.4  | 0.5688 | 0.725 | 4.215  |
| 2 | 20.007 | 9573.3 | 232.2 | 0.629  | 0.613 | 95.785 |

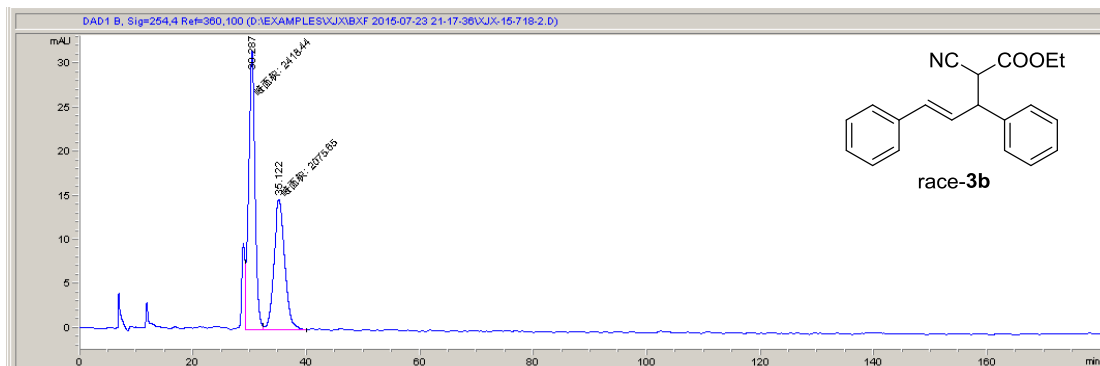

| # | Time   | Area   | Height | Width  | Symmetry | Area % |
|---|--------|--------|--------|--------|----------|--------|
| 1 | 30.287 | 2418.4 | 31.8   | 1.2681 | 1.03     | 53.814 |
| 2 | 35.122 | 2075.6 | 14.9   | 2.329  | 0.878    | 46.186 |

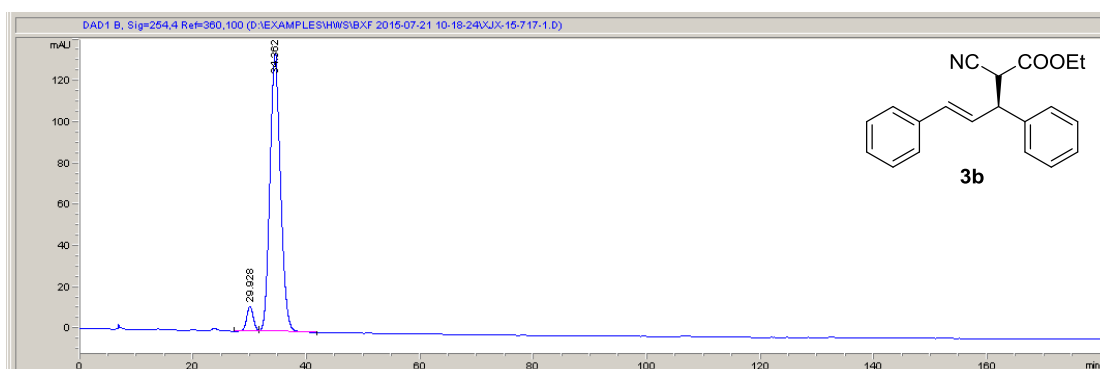

| # | Time   | Area   | Height | Width  | Symmetry | Area % |
|---|--------|--------|--------|--------|----------|--------|
| 1 | 29.928 | 1010.6 | 12.2   | 1.2664 | 0.922    | 5.140  |
| 2 | 34.362 | 18650  | 134.8  | 2.1739 | 0.856    | 94.860 |

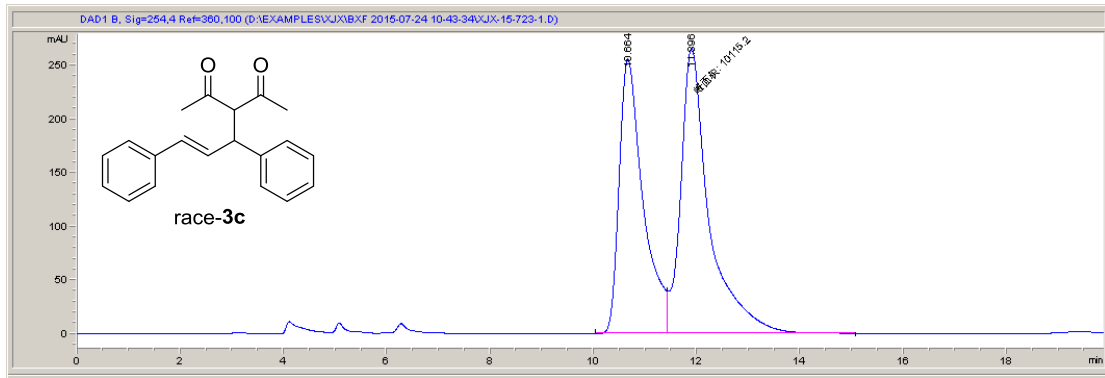

| # | Time   | Area    | Height | Width  | Symmetry | Area % |
|---|--------|---------|--------|--------|----------|--------|
| 1 | 10.664 | 8330.3  | 255.8  | 0.4799 | 0.531    | 45.162 |
| 2 | 11.896 | 10115.2 | 266.1  | 0.6335 | 0.57     | 54.838 |

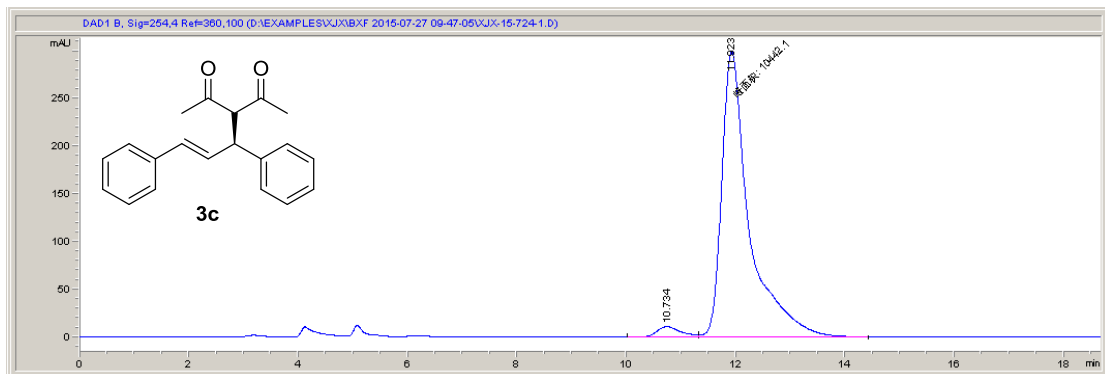

| # | Time   | Area    | Height | Width  | Symmetry | Area % |
|---|--------|---------|--------|--------|----------|--------|
| 1 | 10.734 | 327.1   | 10.8   | 0.4545 | 0.634    | 3.037  |
| 2 | 11.923 | 10442.1 | 299.3  | 0.5814 | 0.544    | 96.963 |

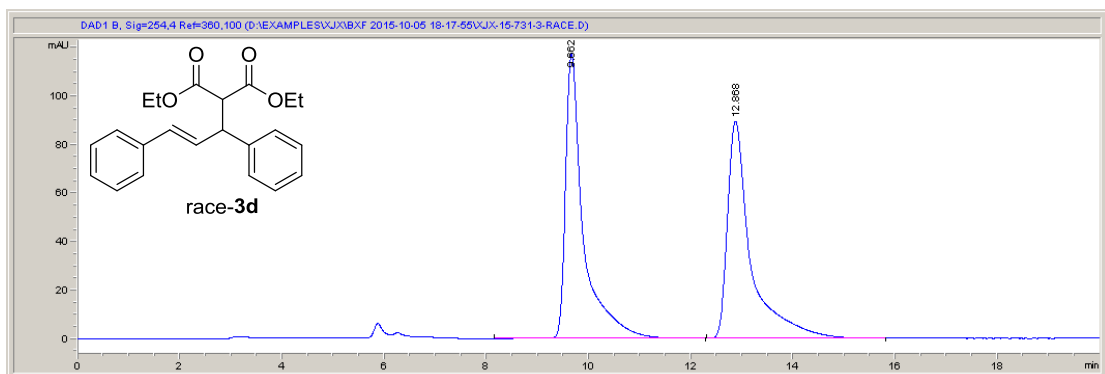

| # | Time   | Area   | Height | Width  | Symmetry | Area % |
|---|--------|--------|--------|--------|----------|--------|
| 1 | 9.662  | 2856.1 | 117.1  | 0.3525 | 0.46     | 50.236 |
| 2 | 12.866 | 2856.1 | 117.1  | 0.3525 | 0.46     | 50.236 |

|   |        |        |      |        |       |        |
|---|--------|--------|------|--------|-------|--------|
| 2 | 12.868 | 2829.2 | 89.3 | 0.4575 | 0.453 | 49.764 |
|---|--------|--------|------|--------|-------|--------|

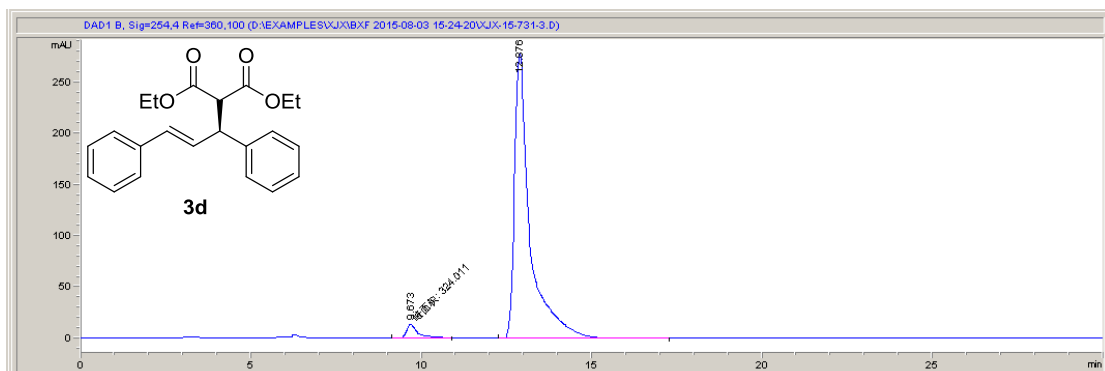

| # | Time   | Area   | Height | Width  | Symmetry | Area % |
|---|--------|--------|--------|--------|----------|--------|
| 1 | 9.673  | 324    | 13.8   | 0.3913 | 0.477    | 3.586  |
| 2 | 12.876 | 8711.3 | 278    | 0.4496 | 0.439    | 96.414 |

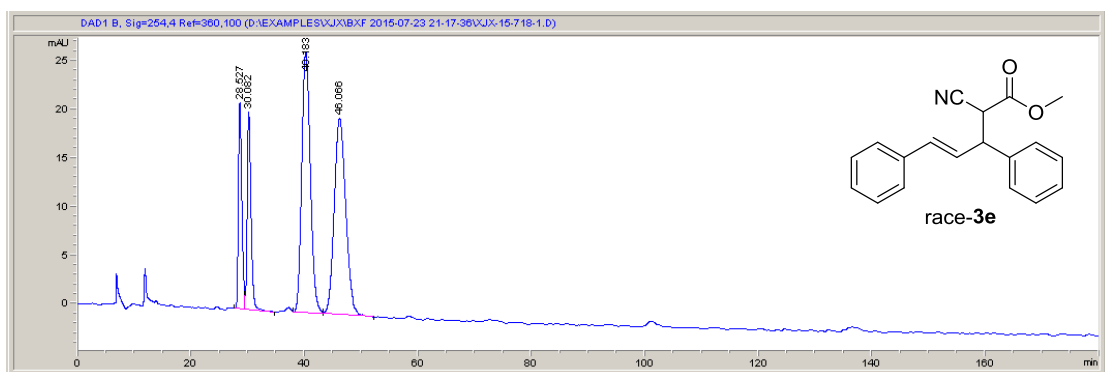

| # | Time   | Area   | Height | Width  | Symmetry | Area % |
|---|--------|--------|--------|--------|----------|--------|
| 1 | 28.527 | 882.5  | 21.1   | 0.6477 | 0.647    | 11.818 |
| 2 | 30.082 | 924.5  | 20.3   | 0.6954 | 0.623    | 12.380 |
| 3 | 40.183 | 2803.2 | 26.9   | 1.6245 | 0.825    | 37.538 |
| 4 | 46.066 | 2857.4 | 20.2   | 2.0445 | 0.819    | 38.264 |

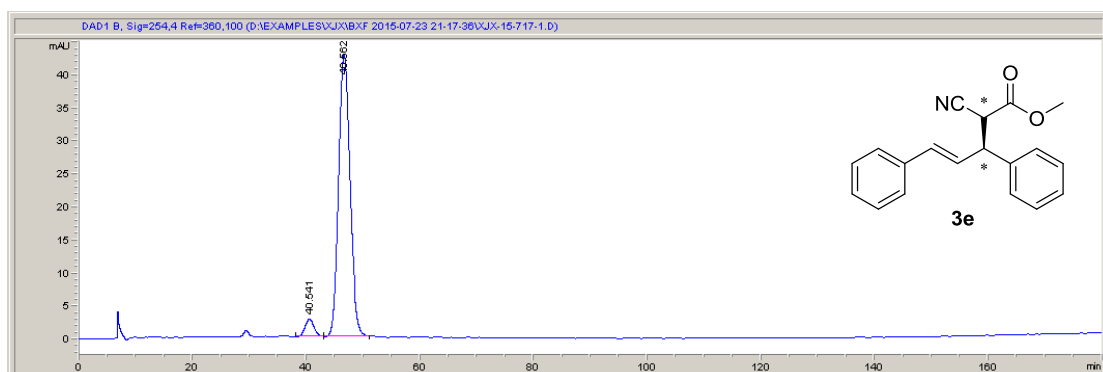

| # | Time   | Area   | Height | Width  | Symmetry | Area % |
|---|--------|--------|--------|--------|----------|--------|
| 1 | 40.541 | 285.3  | 2.7    | 1.2941 | 0.937    | 4.551  |
| 2 | 46.562 | 5983.6 | 42.6   | 2.1459 | 0.856    | 95.449 |

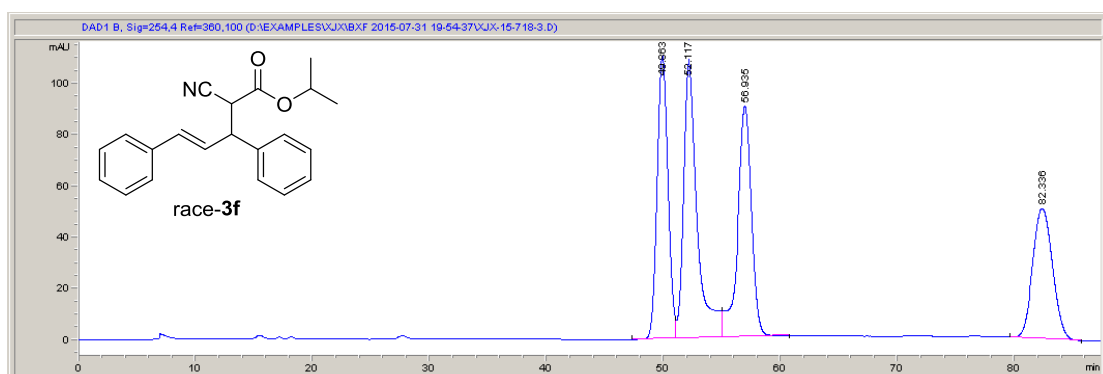

| # | Time   | Area   | Height | Width  | Symmetry | Area % |
|---|--------|--------|--------|--------|----------|--------|
| 1 | 49.863 | 7015.2 | 110.3  | 0.9939 | 0.904    | 23.784 |
| 2 | 52.117 | 9072.2 | 108.5  | 1.2512 | 0.577    | 30.758 |
| 3 | 56.935 | 7449.9 | 89.8   | 1.2596 | 1.139    | 25.258 |
| 4 | 82.336 | 5958.2 | 50.8   | 1.8368 | 0.906    | 20.200 |

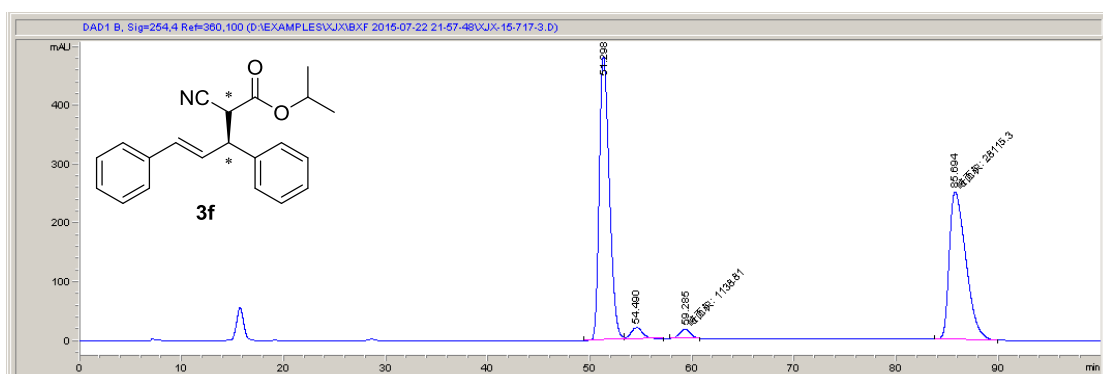

| # | Time   | Area | Height | Width | Symmetry | Area %  |
|---|--------|------|--------|-------|----------|---------|
| 1 | 51.838 | 400  | 400    | 1.000 | 1.000    | 100.000 |
| 2 | 88.604 | 250  | 250    | 1.000 | 1.000    | 25.000  |

|   |        |         |       |        |       |        |
|---|--------|---------|-------|--------|-------|--------|
| 1 | 51.298 | 32740.8 | 483.5 | 1.0541 | 0.668 | 51.467 |
| 2 | 54.49  | 1620.6  | 19.9  | 1.2445 | 0.858 | 2.547  |
| 3 | 59.285 | 1138.8  | 15.4  | 1.2315 | 1.012 | 1.790  |
| 4 | 85.694 | 28115.3 | 251.4 | 1.8639 | 0.529 | 44.196 |

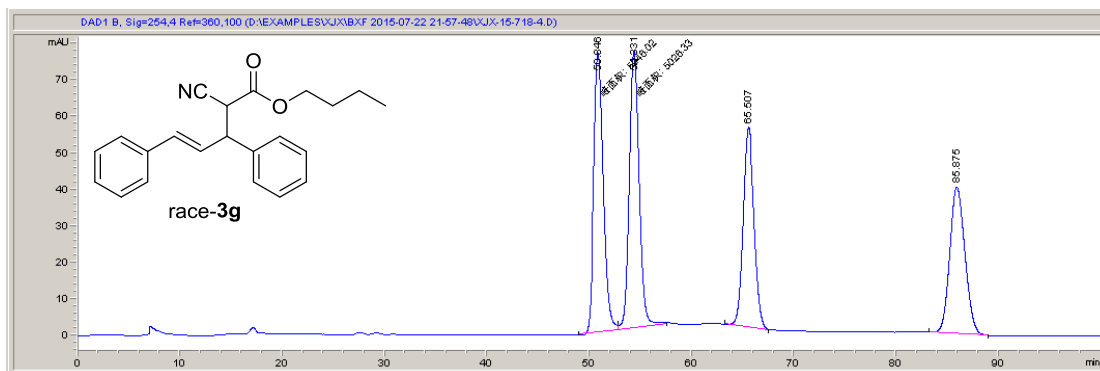

| # | Time   | Area   | Height | Width  | Symmetry | Area % |
|---|--------|--------|--------|--------|----------|--------|
| 1 | 50.846 | 5046   | 76.3   | 1.1019 | 0.775    | 27.490 |
| 2 | 54.331 | 5026.3 | 75.8   | 1.1048 | 0.862    | 27.382 |
| 3 | 65.507 | 4211.1 | 54.7   | 1.2027 | 0.883    | 22.941 |
| 4 | 85.875 | 4072.6 | 40.1   | 1.5839 | 0.832    | 22.187 |

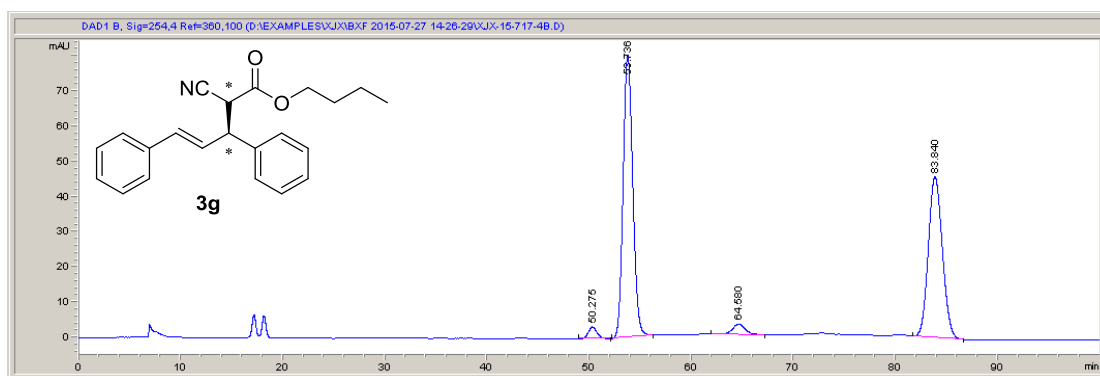

| # | Time   | Area   | Height | Width  | Symmetry | Area % |
|---|--------|--------|--------|--------|----------|--------|
| 1 | 50.275 | 211.3  | 3.4    | 0.9328 | 0.914    | 2.119  |
| 2 | 53.736 | 5189.1 | 80.2   | 1.0105 | 0.846    | 52.039 |
| 3 | 64.58  | 266.6  | 2.9    | 1.3002 | 1.018    | 2.637  |
| 4 | 83.84  | 4304.6 | 45.6   | 1.4802 | 0.864    | 43.169 |

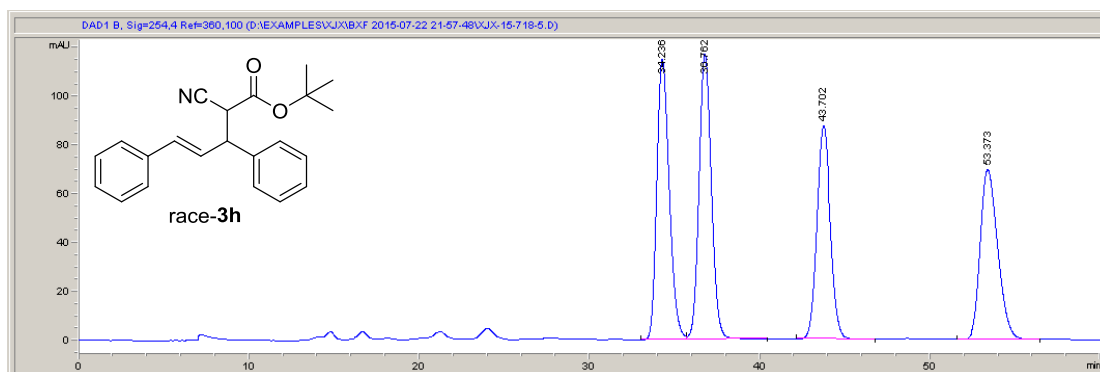

| # | Time   | Area   | Height | Width  | Symmetry | Area % |
|---|--------|--------|--------|--------|----------|--------|
| 1 | 34.236 | 5759.9 | 114.8  | 0.7771 | 0.738    | 26.920 |
| 2 | 36.762 | 5825.5 | 117    | 0.773  | 0.856    | 27.227 |
| 3 | 43.702 | 4920   | 87.5   | 0.8802 | 0.887    | 22.995 |
| 4 | 53.373 | 4890.9 | 69.6   | 1.0835 | 0.718    | 22.858 |

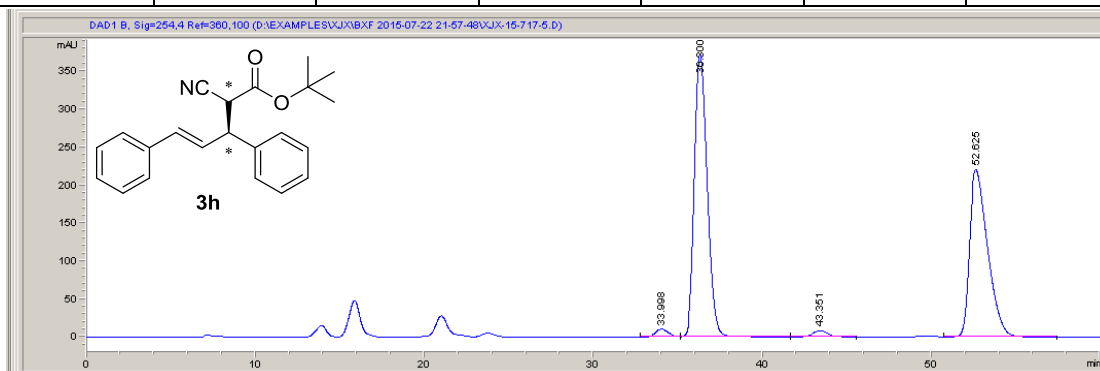

| # | Time   | Area    | Height | Width  | Symmetry | Area % |
|---|--------|---------|--------|--------|----------|--------|
| 1 | 33.998 | 562.6   | 10.6   | 0.8221 | 0.877    | 1.509  |
| 2 | 36.3   | 19594.5 | 373.2  | 0.8205 | 0.758    | 52.563 |
| 3 | 43.351 | 479.4   | 8.1    | 0.9251 | 0.894    | 1.286  |
| 4 | 52.625 | 16641.4 | 220.4  | 1.161  | 0.55     | 44.641 |

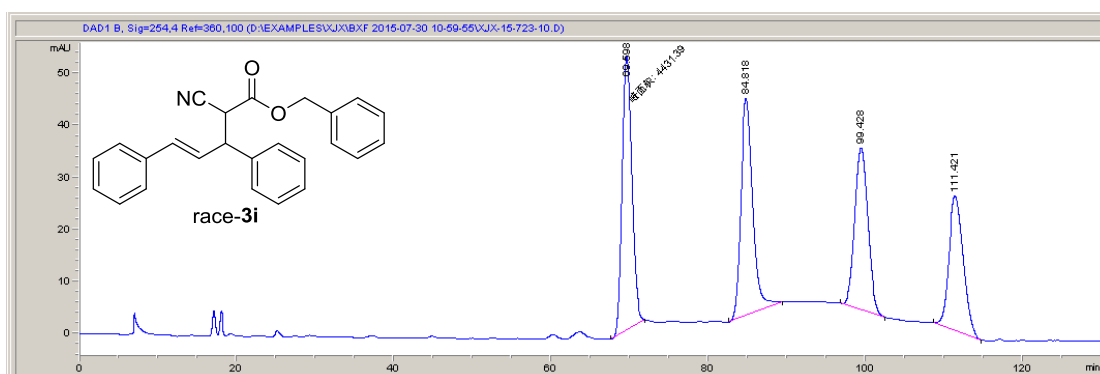

| # | Time    | Area   | Height | Width  | Symmetry | Area % |
|---|---------|--------|--------|--------|----------|--------|
| 1 | 69.598  | 4431.4 | 52.6   | 1.4045 | 0.822    | 28.203 |
| 2 | 84.818  | 4416.8 | 41.7   | 1.6389 | 0.772    | 28.110 |
| 3 | 99.428  | 3577.3 | 31     | 1.7643 | 0.885    | 22.768 |
| 4 | 111.421 | 3286.9 | 25.8   | 1.9693 | 0.773    | 20.919 |

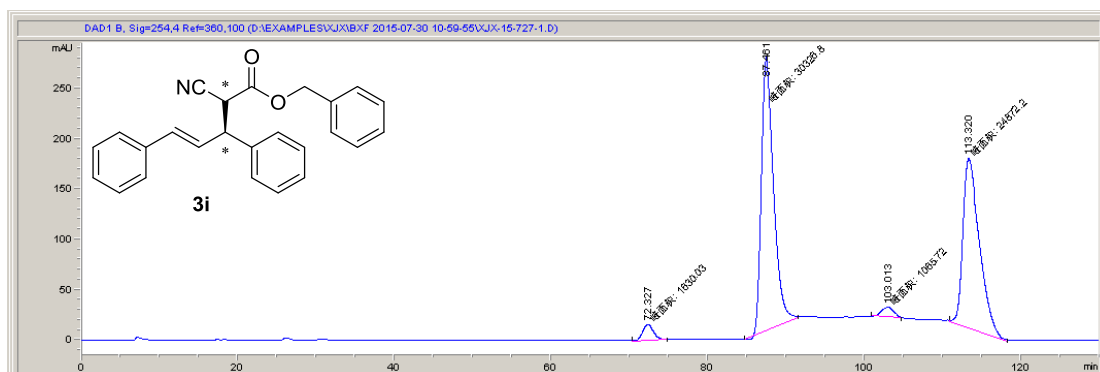

| # | Time    | Area    | Height | Width  | Symmetry | Area % |
|---|---------|---------|--------|--------|----------|--------|
| 1 | 72.327  | 1630    | 16.5   | 1.6492 | 0.795    | 2.816  |
| 2 | 87.461  | 30326.8 | 272.6  | 1.8538 | 0.65     | 52.383 |
| 3 | 103.013 | 1065.7  | 9.8    | 1.8215 | 0.765    | 1.841  |
| 4 | 113.32  | 24872.2 | 168.2  | 2.4648 | 0.503    | 42.961 |

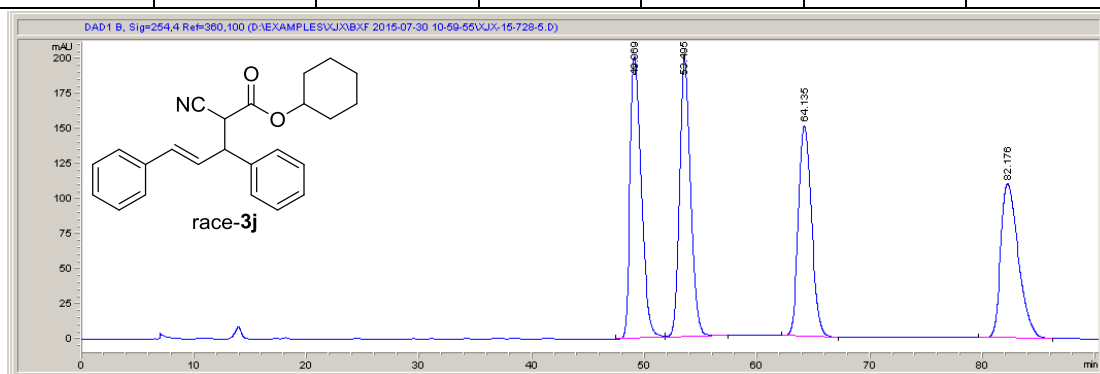

| # | Time   | Area    | Height | Width  | Symmetry | Area % |
|---|--------|---------|--------|--------|----------|--------|
| 1 | 49.069 | 13881.3 | 200.9  | 1.066  | 0.632    | 26.851 |
| 2 | 53.495 | 13847   | 200.6  | 1.0732 | 0.787    | 26.785 |
| 3 | 64.135 | 12049   | 150    | 1.2491 | 0.791    | 23.307 |
| 4 | 82.176 | 11920.1 | 110    | 1.6608 | 0.604    | 23.057 |



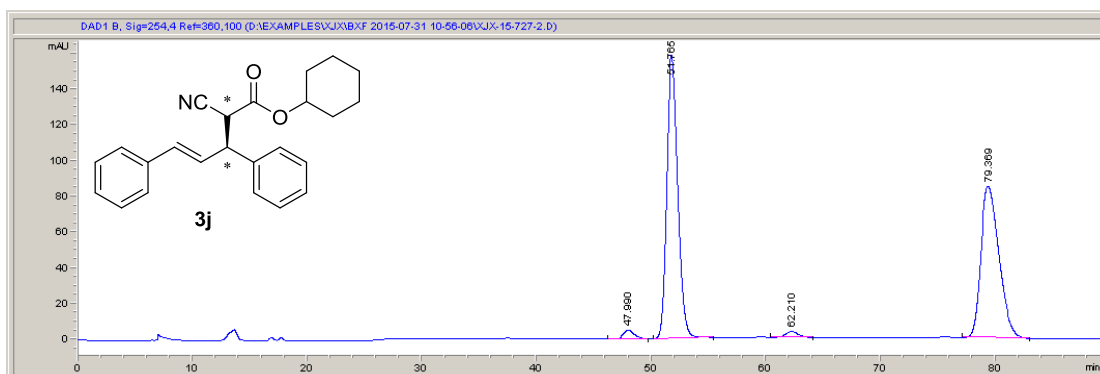

| # | Time   | Area    | Height | Width  | Symmetry | Area % |
|---|--------|---------|--------|--------|----------|--------|
| 1 | 47.99  | 319.3   | 4.9    | 1.0188 | 0.84     | 1.550  |
| 2 | 51.765 | 10728.2 | 158.5  | 1.0535 | 0.789    | 52.069 |
| 3 | 62.21  | 263.8   | 3.4    | 1.1171 | 0.938    | 1.280  |
| 4 | 79.369 | 9292.7  | 85     | 1.6917 | 0.661    | 45.101 |

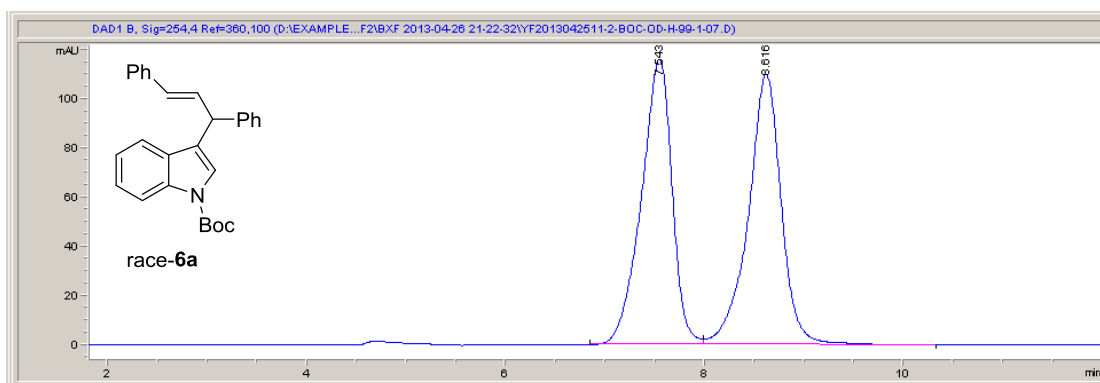

| # | Time  | Area   | Height | Width  | Symmetry | Area % |
|---|-------|--------|--------|--------|----------|--------|
| 1 | 7.543 | 2493.5 | 116    | 0.3227 | 1.395    | 49.567 |
| 2 | 8.616 | 2537.1 | 110    | 0.3432 | 1.151    | 50.433 |

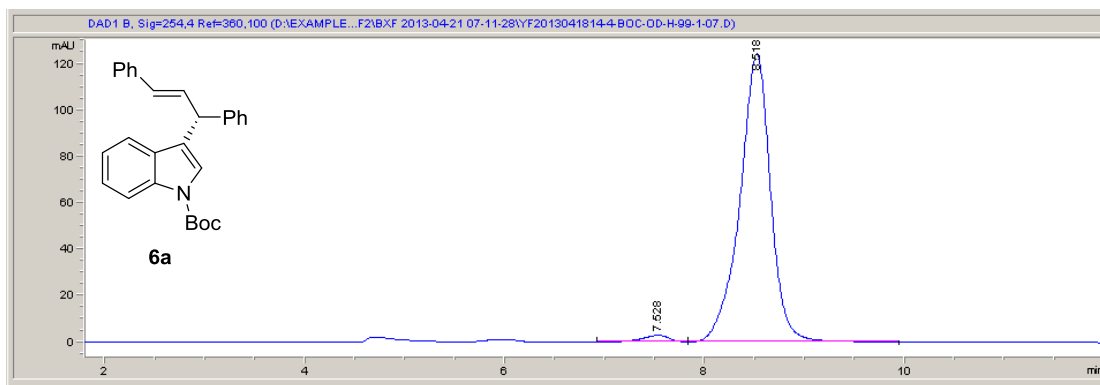

| # | Time  | Area   | Height | Width  | Symmetry | Area % |
|---|-------|--------|--------|--------|----------|--------|
| 1 | 7.528 | 55.3   | 2.9    | 0.2751 | 1.433    | 2.040  |
| 2 | 8.518 | 2657.1 | 124.2  | 0.3196 | 1.175    | 97.960 |

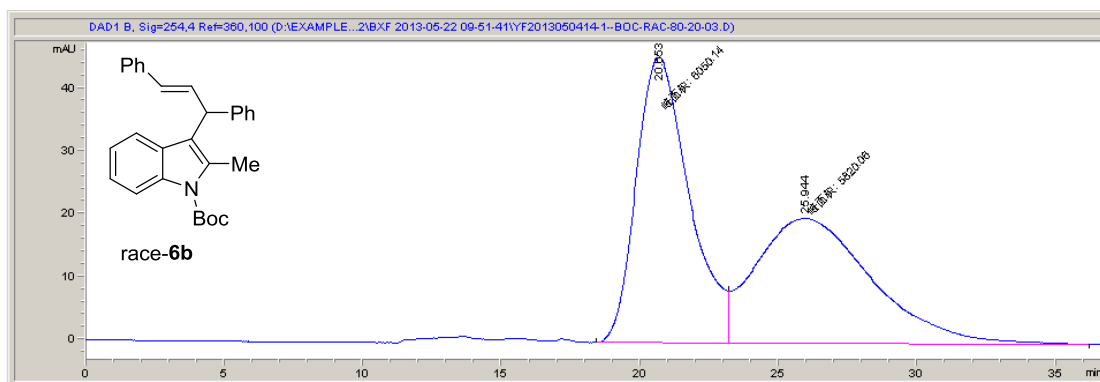

| # | Time   | Area   | Height | Width  | Symmetry | Area % |
|---|--------|--------|--------|--------|----------|--------|
| 1 | 20.653 | 6050.1 | 45.4   | 2.219  | 0.698    | 50.969 |
| 2 | 25.944 | 5820.1 | 19.9   | 4.8682 | 0.704    | 49.031 |

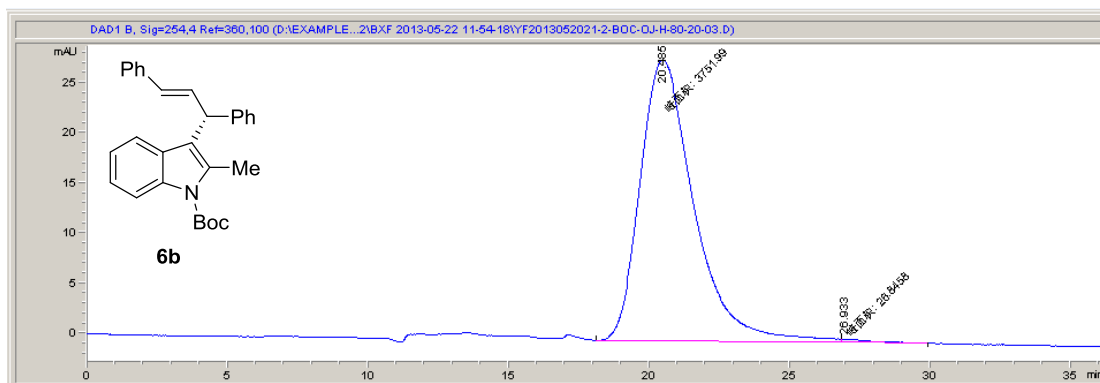

| # | Time   | Area    | Height | Width | Symmetry | Area % |
|---|--------|---------|--------|-------|----------|--------|
| 1 | 20.980 | 3751.99 |        |       |          |        |
| 2 | 26.633 | 23.9438 |        |       |          |        |

|   |        |      |        |        |         |        |
|---|--------|------|--------|--------|---------|--------|
| 1 | 20.485 | 3752 | 28.1   | 2.2246 | 0       | 99.290 |
| 2 | 26.933 | 26.8 | 3.7E-1 | 1.2048 | 6.02E-2 | 0.710  |

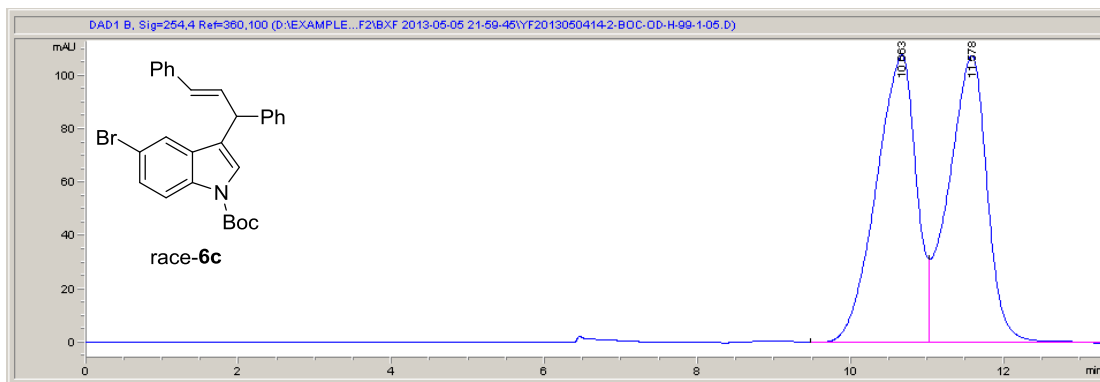

| # | Time   | Area   | Height | Width  | Symmetry | Area % |
|---|--------|--------|--------|--------|----------|--------|
| 1 | 10.663 | 3921.2 | 107.7  | 0.5667 | 1.671    | 51.046 |
| 2 | 11.578 | 3760.5 | 107.6  | 0.5359 | 1.392    | 48.954 |

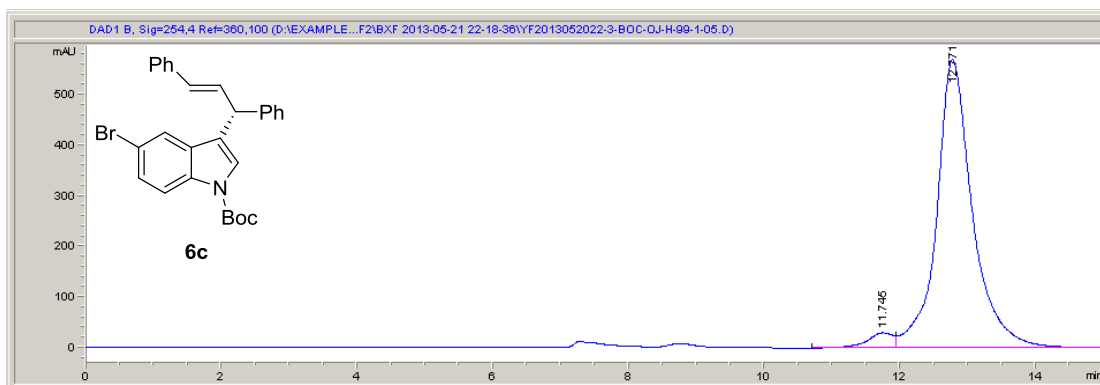

| # | Time   | Area    | Height | Width  | Symmetry | Area % |
|---|--------|---------|--------|--------|----------|--------|
| 1 | 11.745 | 807.5   | 29.6   | 0.3999 | 1.546    | 3.728  |
| 2 | 12.771 | 20849.8 | 568.8  | 0.5377 | 0.765    | 96.272 |

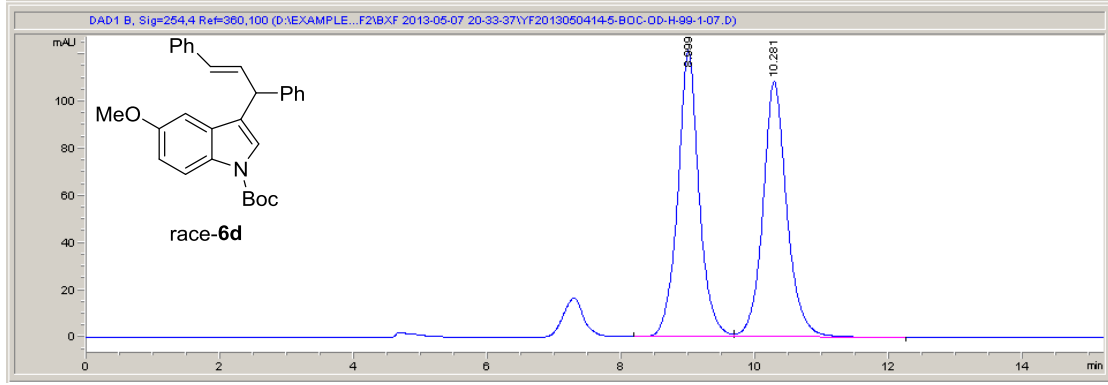

| # | Time   | Area   | Height | Width  | Symmetry | Area % |
|---|--------|--------|--------|--------|----------|--------|
| 1 | 8.999  | 2686.3 | 121.3  | 0.3244 | 0.945    | 49.899 |
| 2 | 10.281 | 2697.2 | 108.3  | 0.3686 | 0.842    | 50.101 |

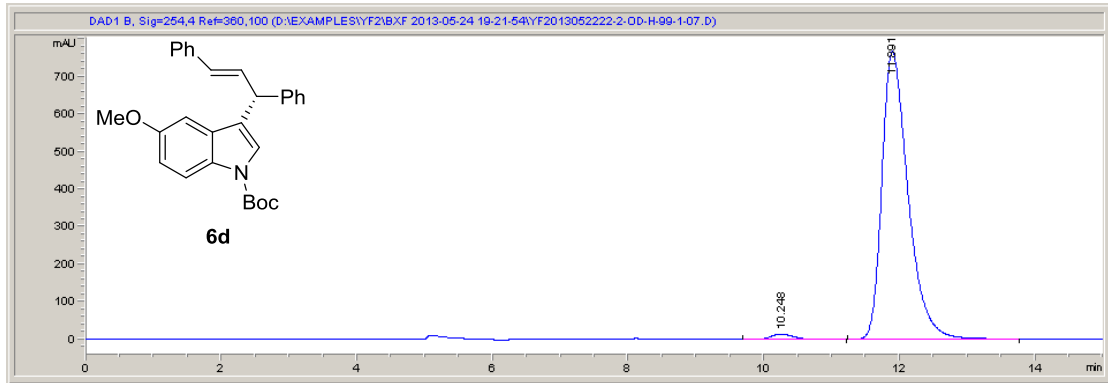

| # | Time   | Area    | Height | Width | Symmetry | Area % |
|---|--------|---------|--------|-------|----------|--------|
| 1 | 10.248 | 344.2   | 14.7   | 0.359 | 0.76     | 1.644  |
| 2 | 11.891 | 20595.3 | 767.6  | 0.409 | 0.623    | 98.356 |

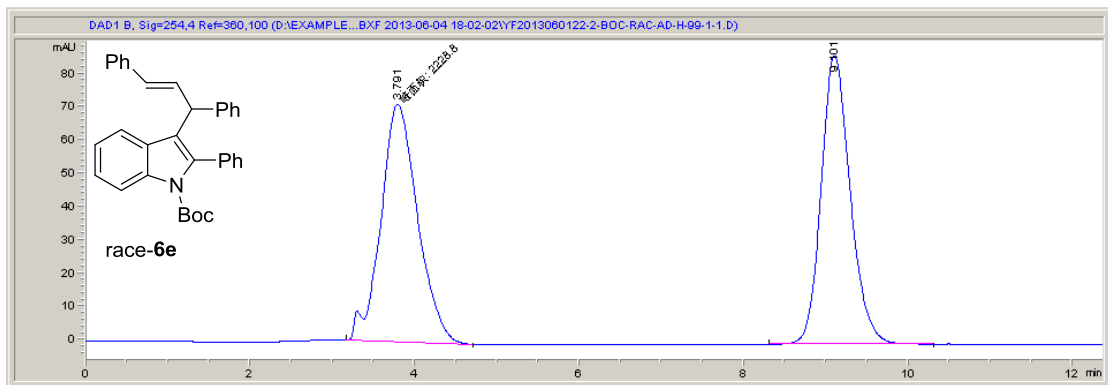

| # | Time  | Area | Height | Width | Symmetry | Area % |
|---|-------|------|--------|-------|----------|--------|
| 1 | 3.701 |      |        |       |          |        |
| 2 | 9.101 |      |        |       |          |        |

|   |       |        |      |        |       |        |
|---|-------|--------|------|--------|-------|--------|
| 1 | 3.791 | 2228.8 | 71.5 | 0.5193 | 0.831 | 51.102 |
| 2 | 9.101 | 2132.6 | 86.7 | 0.3769 | 0.806 | 48.898 |

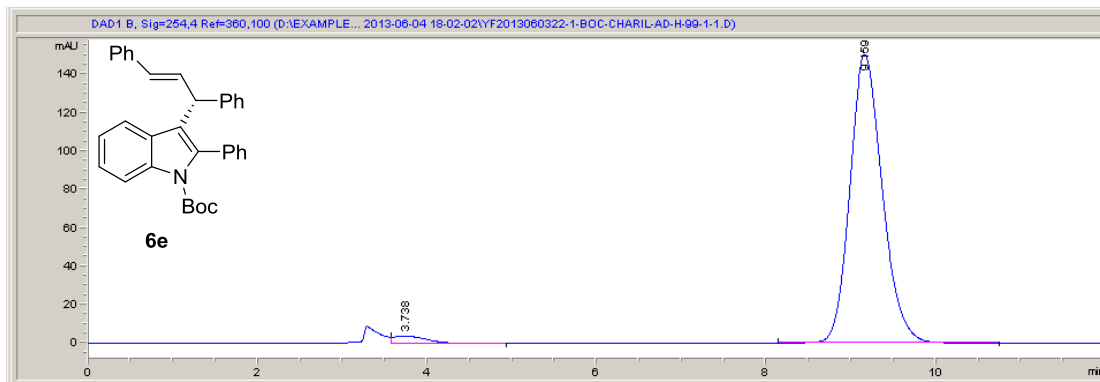

| # | Time  | Area   | Height | Width  | Symmetry | Area % |
|---|-------|--------|--------|--------|----------|--------|
| 1 | 3.738 | 108.2  | 3.9    | 0.4009 | 0.465    | 2.636  |
| 2 | 9.159 | 3998.9 | 150.5  | 0.406  | 0.808    | 97.364 |

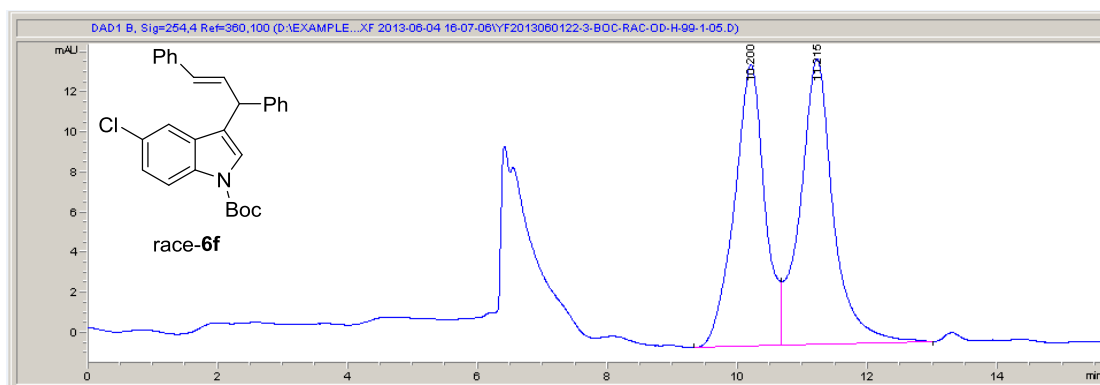

| # | Time   | Area  | Height | Width  | Symmetry | Area % |
|---|--------|-------|--------|--------|----------|--------|
| 1 | 10.2   | 457.2 | 14.1   | 0.471  | 1.168    | 49.324 |
| 2 | 11.215 | 508.9 | 14.3   | 0.5096 | 0.939    | 50.676 |

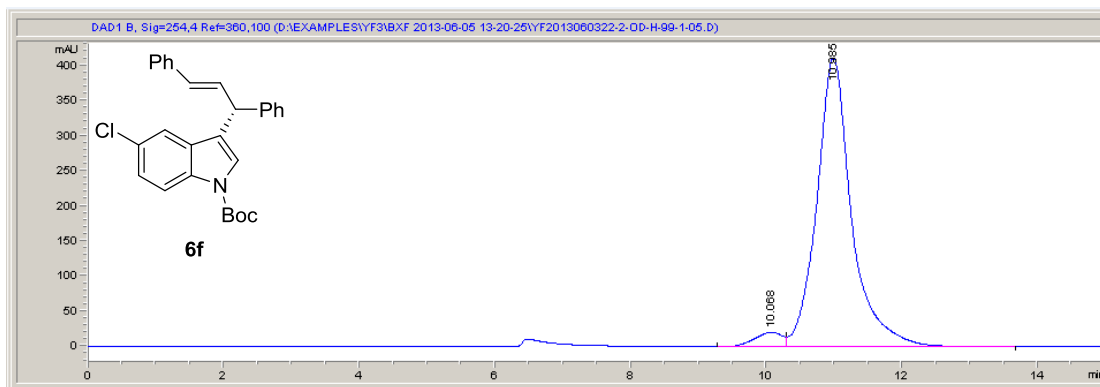

| # | Time   | Area    | Height | Width  | Symmetry | Area % |
|---|--------|---------|--------|--------|----------|--------|
| 1 | 10.068 | 601.4   | 20.8   | 0.434  | 1.594    | 3.932  |
| 2 | 10.985 | 14693.7 | 411.6  | 0.5185 | 0.845    | 96.068 |

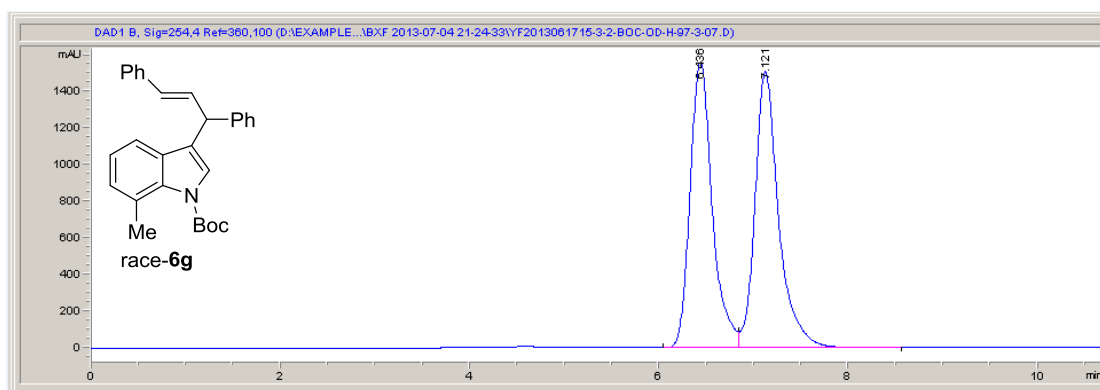

| # | Time  | Area    | Height | Width | Symmetry | Area % |
|---|-------|---------|--------|-------|----------|--------|
| 1 | 6.436 | 25382   | 1558.6 | 0.25  | 0.828    | 49.285 |
| 2 | 7.121 | 26118.9 | 1508.7 | 0.258 | 0.719    | 50.715 |

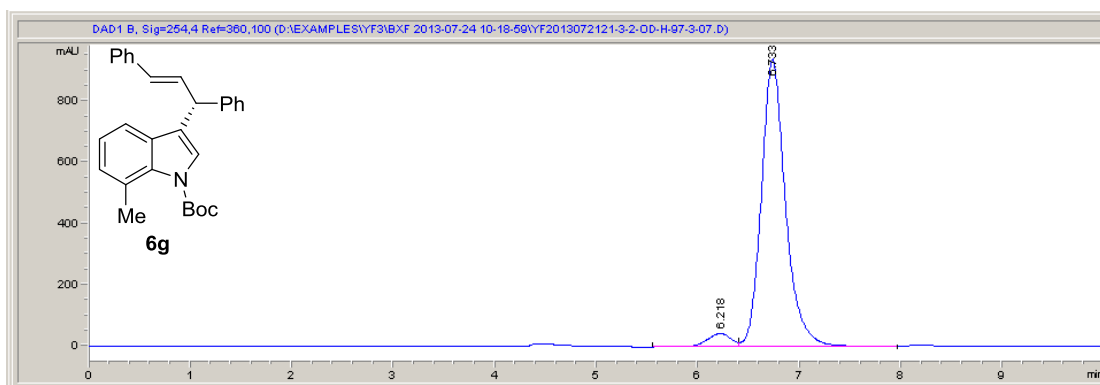

| # | Time  | Area | Height | Width | Symmetry | Area % |
|---|-------|------|--------|-------|----------|--------|
| 1 | 6.216 |      |        |       |          |        |
| 2 | 6.933 |      |        |       |          |        |

|   |       |         |       |        |       |        |
|---|-------|---------|-------|--------|-------|--------|
| 1 | 6.218 | 708.8   | 43.5  | 0.2481 | 1.242 | 4.376  |
| 2 | 6.733 | 15490.6 | 937.1 | 0.2469 | 0.807 | 95.624 |

(R, E)-N-(1,3-diphenylallyl)aniline (**8a**)

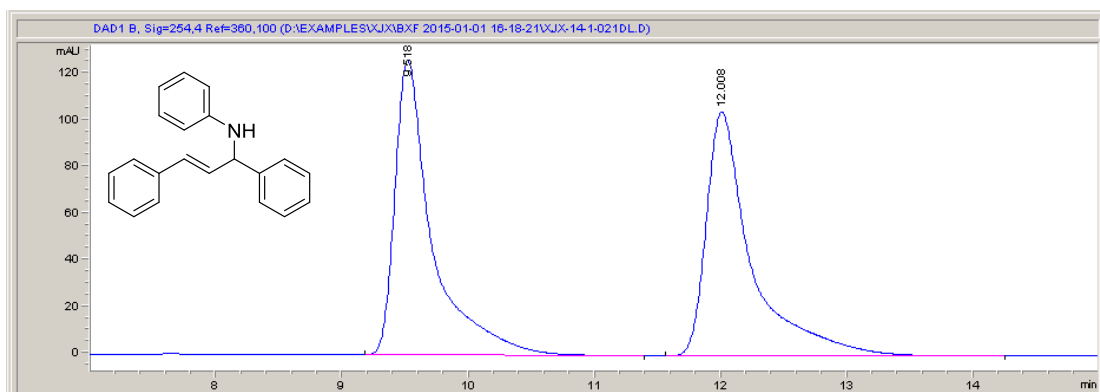

| # | Time   | Area   | Height | Width  | Symmetry | Area % |
|---|--------|--------|--------|--------|----------|--------|
| 1 | 9.518  | 2598.1 | 126.5  | 0.2957 | 0.465    | 49.946 |
| 2 | 12.008 | 2603.7 | 104.7  | 0.3582 | 0.466    | 50.054 |

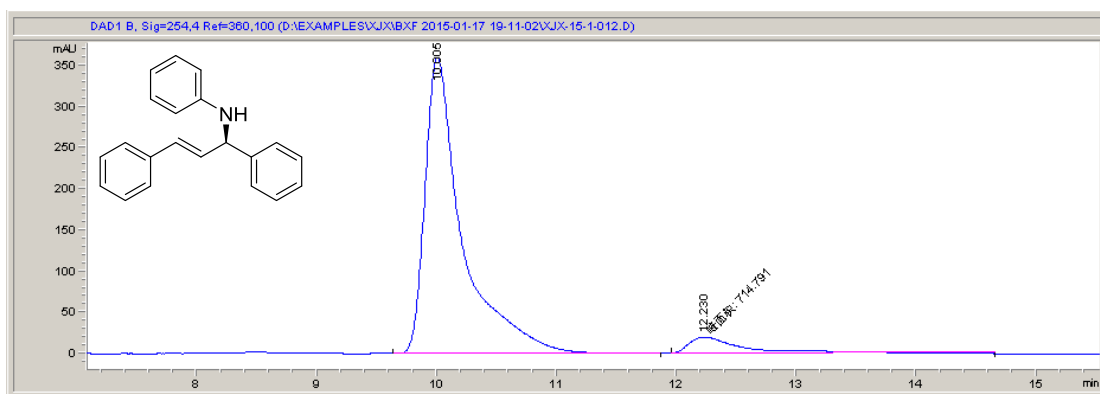

| # | Time   | Area   | Height | Width  | Symmetry | Area % |
|---|--------|--------|--------|--------|----------|--------|
| 1 | 10.005 | 7796.2 | 359.9  | 0.3127 | 0.444    | 91.602 |
| 2 | 12.23  | 714.8  | 20.7   | 0.5753 | 0.357    | 8.398  |

8b:

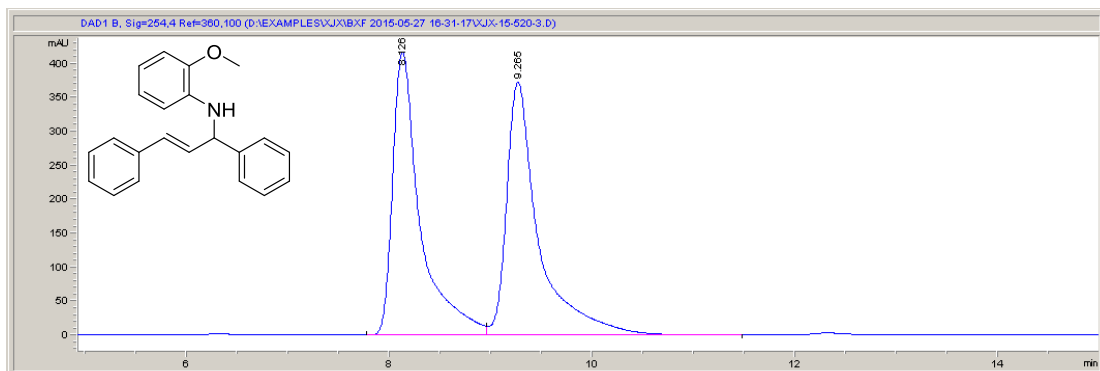

| # | Time  | Area   | Height | Width  | Symmetry | Area % |
|---|-------|--------|--------|--------|----------|--------|
| 1 | 8.126 | 7857.8 | 416.9  | 0.2759 | 0.496    | 49.046 |
| 2 | 9.265 | 8163.4 | 372.1  | 0.32   | 0.483    | 50.954 |

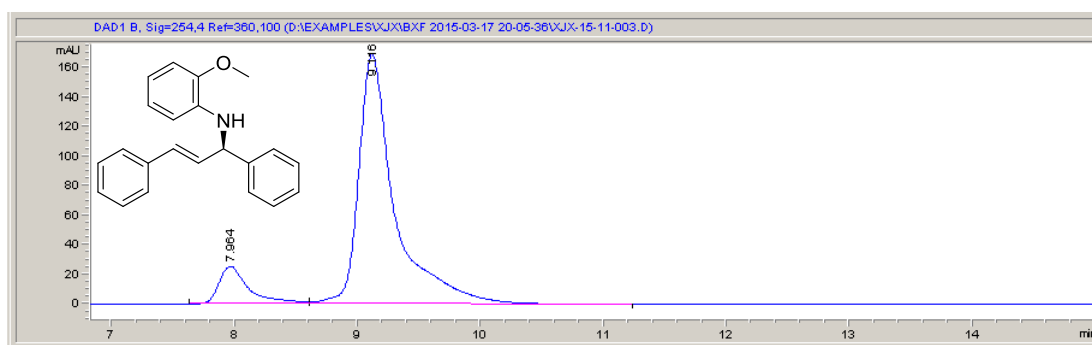

| # | Time  | Area  | Height | Width  | Symmetry | Area % |
|---|-------|-------|--------|--------|----------|--------|
| 1 | 7.964 | 435.7 | 25.5   | 0.2494 | 0.537    | 11.153 |
| 2 | 9.116 | 3471  | 169.1  | 0.2975 | 0.526    | 88.847 |



8c:

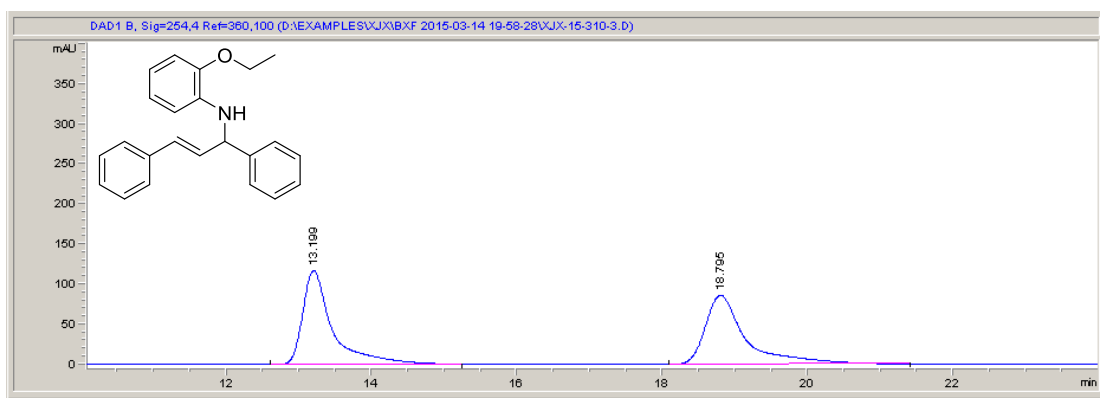

| # | Time   | Area   | Height | Width  | Symmetry | Area % |
|---|--------|--------|--------|--------|----------|--------|
| 1 | 13.199 | 3327.7 | 117    | 0.414  | 0.515    | 49.813 |
| 2 | 18.795 | 3352.6 | 86.2   | 0.5619 | 0.529    | 50.187 |

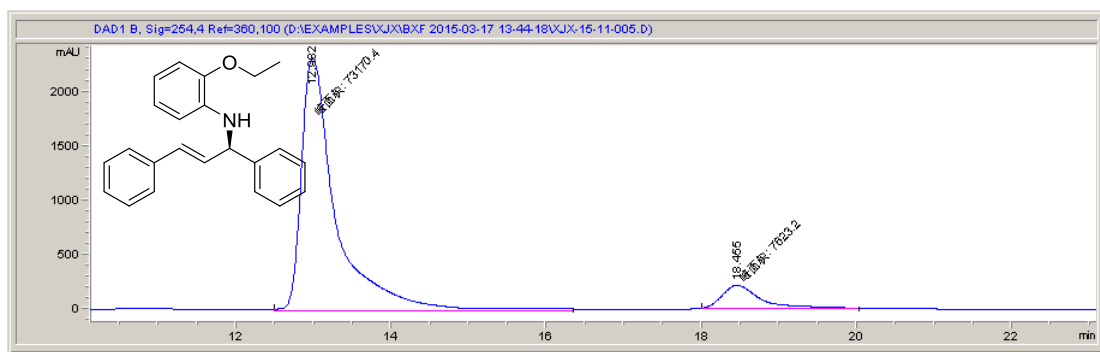

| # | Time   | Area    | Height | Width  | Symmetry | Area % |
|---|--------|---------|--------|--------|----------|--------|
| 1 | 12.982 | 73170.4 | 2322.5 | 0.5251 | 0.45     | 90.565 |
| 2 | 18.455 | 7623.2  | 214    | 0.5936 | 0.6      | 9.435  |

8d:

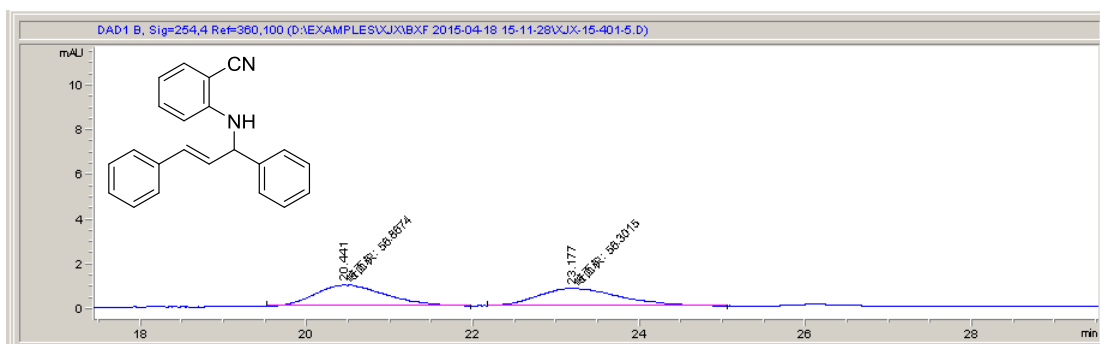

| # | Time   | Area | Height | Width  | Symmetry | Area % |
|---|--------|------|--------|--------|----------|--------|
| 1 | 20.441 | 56.9 | 0.95   | 1.0009 | 0.68     | 50.250 |
| 2 | 23.177 | 56.3 | 0.79   | 1.1862 | 0.668    | 49.750 |

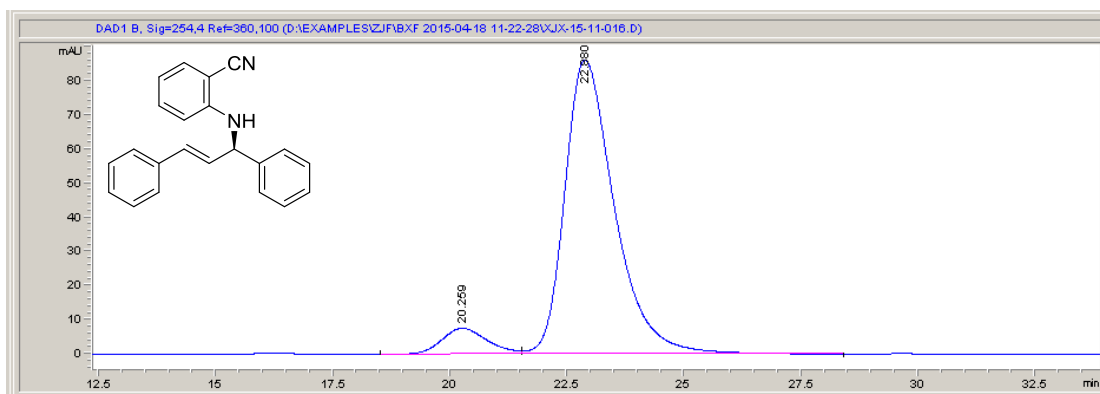

| # | Time   | Area  | Height | Width  | Symmetry | Area % |
|---|--------|-------|--------|--------|----------|--------|
| 1 | 20.259 | 520.5 | 7.6    | 1.0133 | 0.794    | 7.529  |
| 2 | 22.288 | 6393  | 86.4   | 1.1245 | 0.636    | 92.471 |

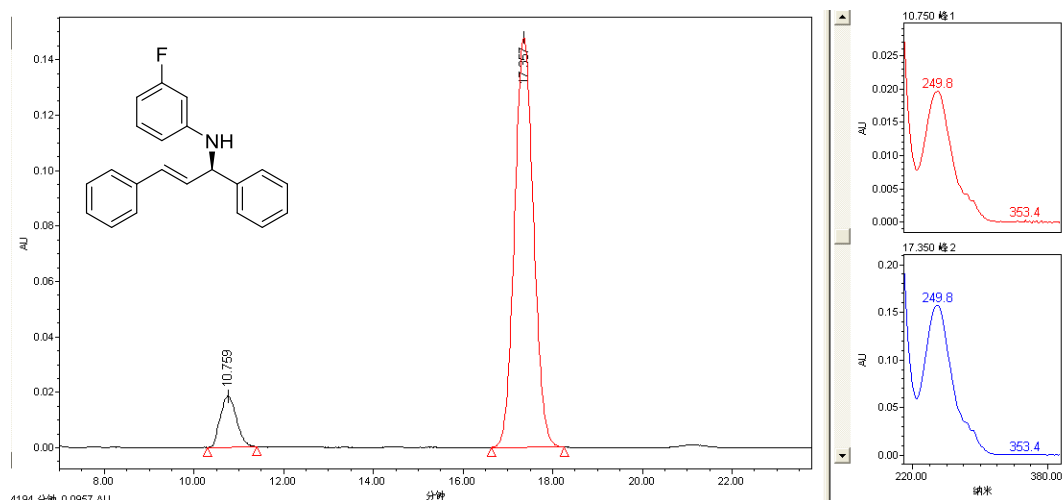

| # | Time   | Area    | Height | Area % |
|---|--------|---------|--------|--------|
| 1 | 10.759 | 461148  | 18458  | 9.60   |
| 2 | 17.357 | 4341330 | 147794 | 90.40  |

8e:

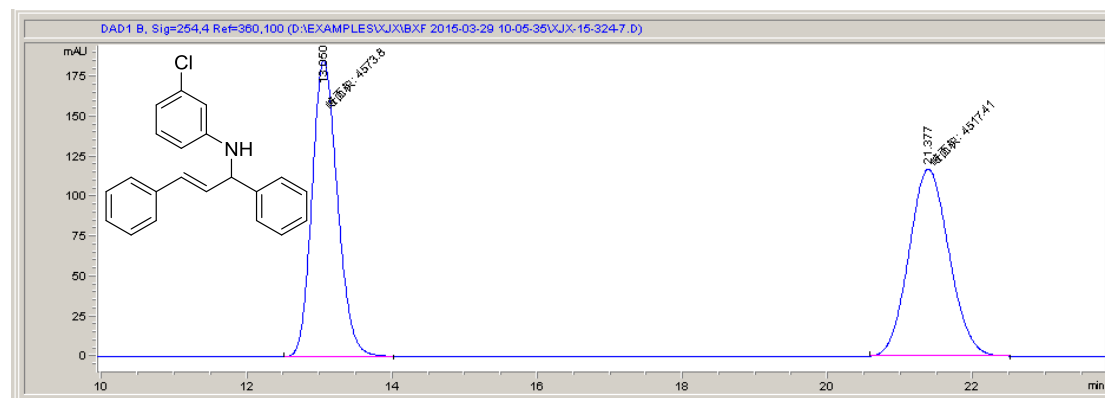

| # | Time   | Area   | Height | Width  | Symmetry | Area % |
|---|--------|--------|--------|--------|----------|--------|
| 1 | 13.05  | 4573.8 | 186.5  | 0.4088 | 0.803    | 50.310 |
| 2 | 21.377 | 4517.4 | 117.4  | 0.6414 | 0.912    | 49.690 |

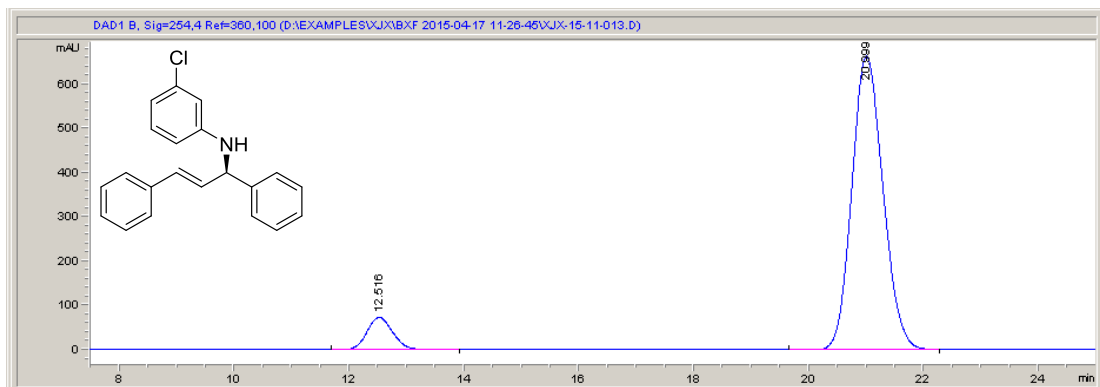

| # | Time   | Area    | Height | Width  | Symmetry | Area % |
|---|--------|---------|--------|--------|----------|--------|
| 1 | 12.516 | 2261.3  | 72.9   | 0.4819 | 0.86     | 8.326  |
| 2 | 20.999 | 24896.3 | 662.1  | 0.5867 | 0.841    | 91.674 |

8f:

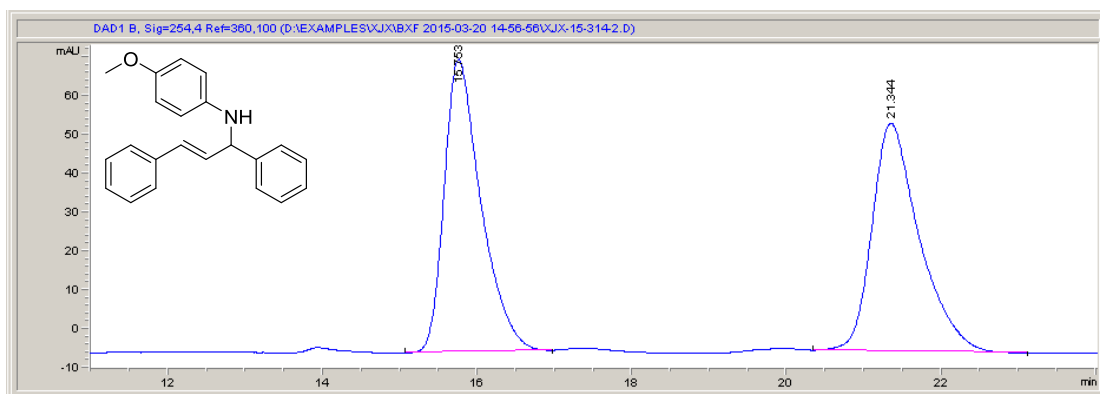

| # | Time   | Area   | Height | Width  | Symmetry | Area % |
|---|--------|--------|--------|--------|----------|--------|
| 1 | 15.753 | 2490.1 | 75.3   | 0.4878 | 0.607    | 49.819 |
| 2 | 21.344 | 2508.3 | 58.7   | 0.6204 | 0.633    | 50.181 |

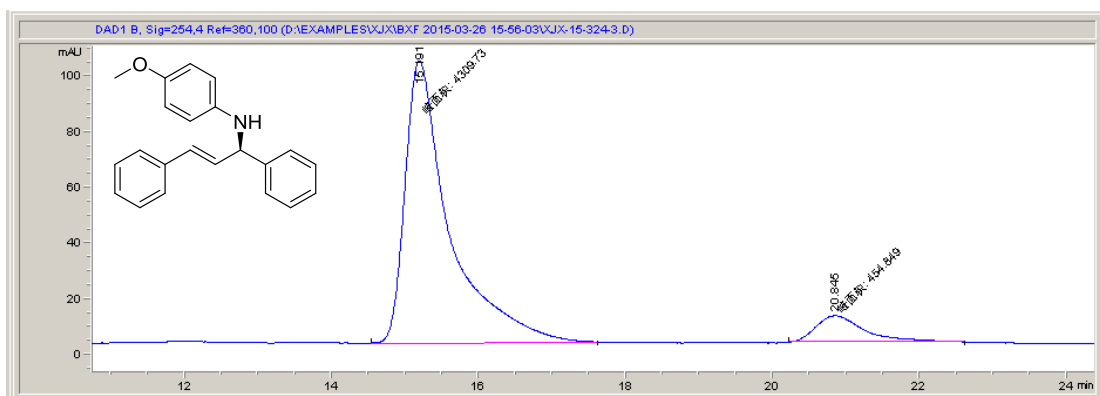

| # | Time   | Area   | Height | Width  | Symmetry | Area % |
|---|--------|--------|--------|--------|----------|--------|
| 1 | 15.191 | 4309.7 | 101.9  | 0.705  | 0.461    | 90.454 |
| 2 | 20.845 | 454.8  | 9.5    | 0.7961 | 0.596    | 9.546  |

(R,E)-N-(1,3-Diphenylallyl)-4-nitroaniline (**8g**)

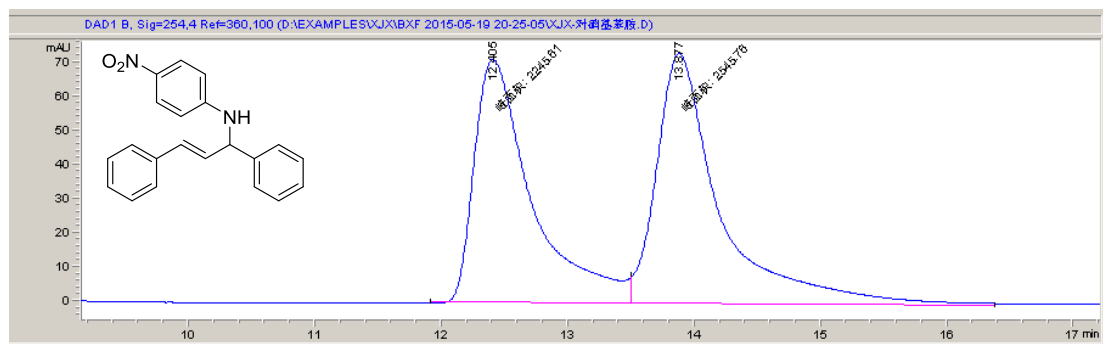

| # | Time   | Area   | Height | Width  | Symmetry | Area % |
|---|--------|--------|--------|--------|----------|--------|
| 1 | 12.405 | 2245.6 | 71.1   | 0.5264 | 0        | 46.868 |
| 2 | 13.877 | 2545.8 | 73     | 0.581  | 0.528    | 53.132 |

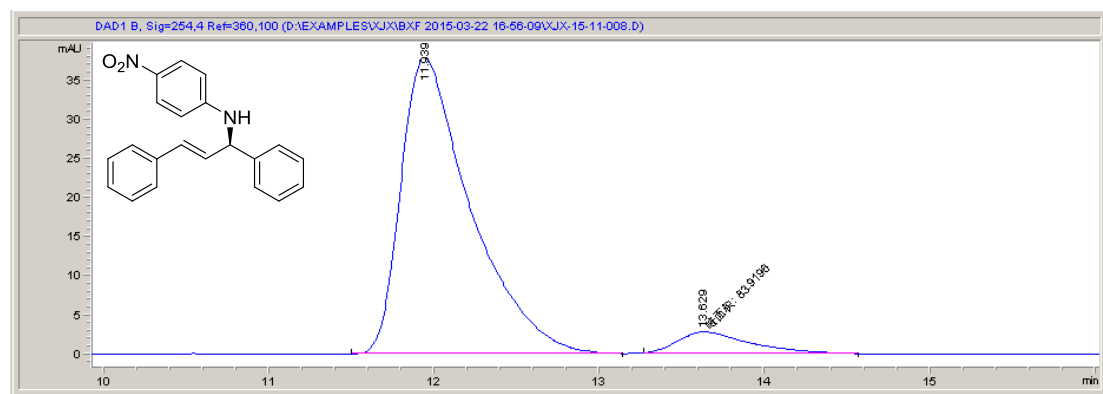

| # | Time   | Area   | Height | Width  | Symmetry | Area % |
|---|--------|--------|--------|--------|----------|--------|
| 1 | 11.939 | 1113.5 | 37.9   | 0.4348 | 0.473    | 92.991 |
| 2 | 13.629 | 83.9   | 2.8    | 0.5085 | 0.524    | 7.009  |

8h:

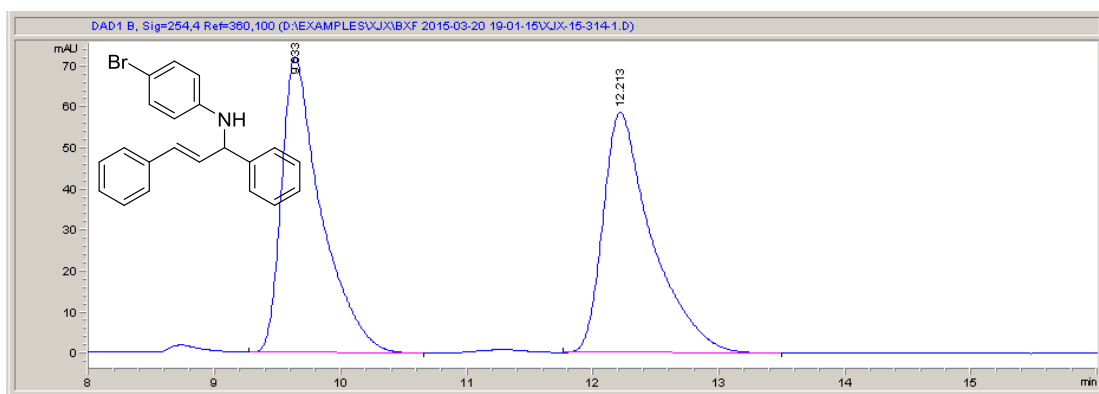

| # | Time   | Area   | Height | Width  | Symmetry | Area % |
|---|--------|--------|--------|--------|----------|--------|
| 1 | 9.633  | 1573.6 | 71.9   | 0.3152 | 0.484    | 49.877 |
| 2 | 12.213 | 1581.4 | 58.6   | 0.3888 | 0.507    | 50.123 |

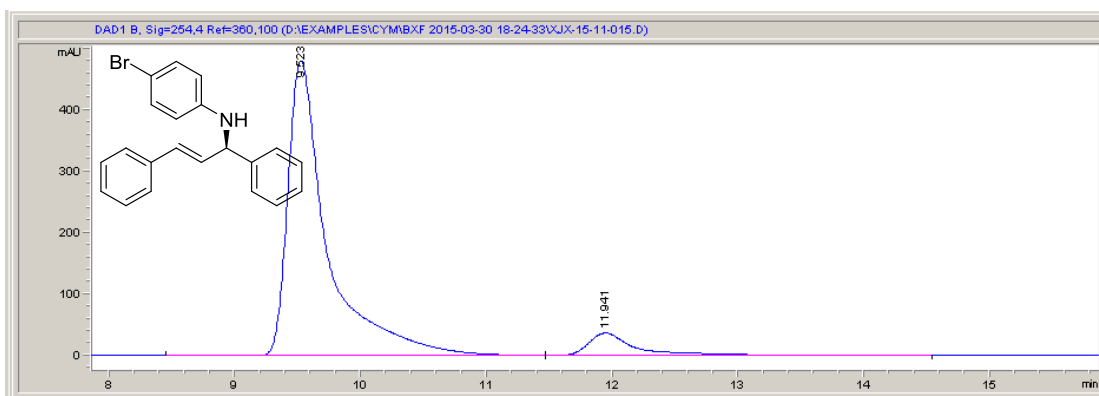

| # | Time   | Area    | Height | Width  | Symmetry | Area % |
|---|--------|---------|--------|--------|----------|--------|
| 1 | 9.523  | 10522.8 | 480.1  | 0.3157 | 0.435    | 91.376 |
| 2 | 11.941 | 993.1   | 36.7   | 0.3919 | 0.465    | 8.624  |

8i:

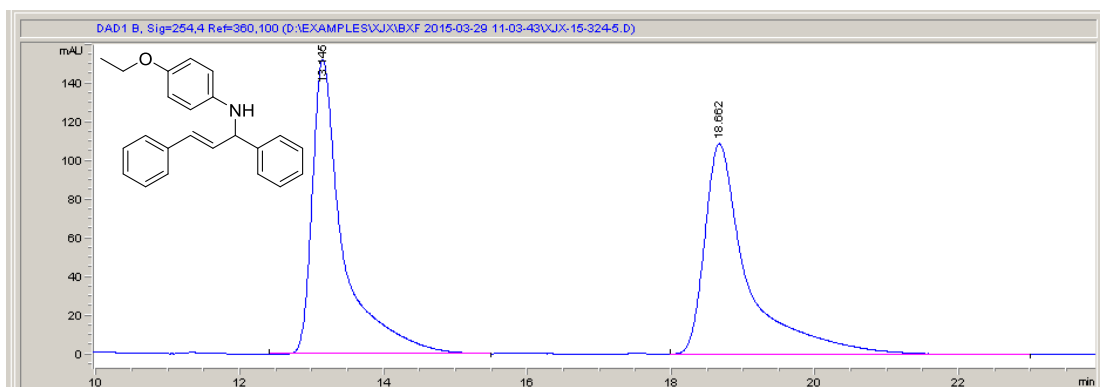

| # | Time   | Area   | Height | Width  | Symmetry | Area % |
|---|--------|--------|--------|--------|----------|--------|
| 1 | 13.145 | 4508.6 | 152.2  | 0.4257 | 0.457    | 49.712 |
| 2 | 18.662 | 4560.8 | 108.8  | 0.6009 | 0.457    | 50.288 |

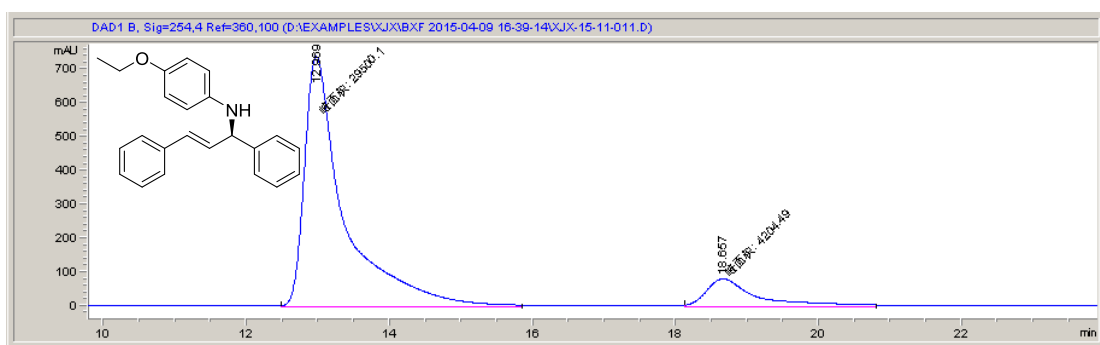

| # | Time   | Area    | Height | Width | Symmetry | Area % |
|---|--------|---------|--------|-------|----------|--------|
| 1 | 12.969 | 29500.1 | 743.8  | 0.661 | 0.392    | 87.525 |
| 2 | 18.657 | 4204.5  | 82.3   | 0.851 | 0.456    | 12.475 |
